# Supplementary material for: Human subtelomeric duplicon structure and organization
Source: PubMed Central journal article supplement (PMC2323237; doi:10.1186/gb-2007-8-7-r151), 2007-07-30
Supplement: gb-2007-8-7-r151-S1.pdf [file gb-2007-8-7-r151-S1.pdf]

Additional Data File 1. Hybrid Genome Coordinates

| <b>chr</b> | <b>p - cut</b> | <b>q - cut</b> |
|------------|----------------|----------------|
| chr1       | 1062370        | 244977446      |
| chr2       | 500175         | 242315013      |
| chr3       | 508216         | 198951071      |
| chr4       | 500000         | 190901334      |
| chr5       | 570131         | 180341779      |
| chr6       | 505000         | 170472700      |
| chr7       | 513631         | 158128301      |
| chr8       | 536613         | 145775593      |
| chr9       | 499099         | 137929465      |
| chr10      | 550000         | 134913691      |
| chr11      | 551333         | 133950513      |
| chr12      | 515901         | 131889851      |
| chr13      | 0              | 113632083      |
| chr14      | 0              | 105851506      |
| chr15      | 0              | 99838916       |
| chr16      | 500000         | 88320853       |
| chr17      | 465509         | 78294648       |
| chr18      | 499161         | 75621849       |
| chr19      | 510078         | 63310821       |
| chr20      | 507039         | 61935965       |
| chr21      | 0              | 46445316       |
| chr22      | 0              | 48997402       |
| chrX       | 637491         | 154324169      |
| chrY       | 637491         | 57158604       |
