# Supplementary material for: Human subtelomeric duplicon structure and organization
Source: PubMed Central journal article supplement (PMC2323237; doi:10.1186/gb-2007-8-7-r151), 2007-07-30
Supplement: gb-2007-8-7-r151-S3.pdf [file gb-2007-8-7-r151-S3.pdf]

| module | query sequence |        |        | length | aligned sequences                                                                                                                                                            | %ID <sub>each</sub>                                | %ID <sub>avg</sub> | intra |
|--------|----------------|--------|--------|--------|------------------------------------------------------------------------------------------------------------------------------------------------------------------------------|----------------------------------------------------|--------------------|-------|
| 1      | 1p             | 1      | 25292  | 25292  | 17q: 43948 - 19570                                                                                                                                                           | 98.01                                              | 98.01              | 0     |
| 2      | 1p             | 1      | 43068  | 43068  | 5q: 58545 - 15084                                                                                                                                                            | 98.93                                              | 98.93              | 0     |
| 3      | 1p             | 1      | 127509 | 127509 | 6q: 133267 - 9260                                                                                                                                                            | 98.65                                              | 98.65              | 0     |
| 4      | 1p             | 26953  | 29950  | 2998   | chr1: 239479432 - 239482412                                                                                                                                                  | 97.27                                              | 97.27              | 1     |
| 5      | 1p             | 26953  | 43068  | 16116  | chr4: 119705181 - 119722680                                                                                                                                                  | 97.44                                              | 97.44              | 0     |
| 6      | 1p             | 26953  | 62722  | 35770  | chrY: 25807359 - 25838662<br>chrY: 24800028 - 24831337                                                                                                                       | 96.83<br>96.83                                     | 96.83              | 0     |
| 7      | 1p             | 26996  | 134371 | 107376 | 8p: 1 - 103892                                                                                                                                                               | 98.69                                              | 98.69              | 0     |
| 8      | 1p             | 28586  | 29950  | 1365   | chr1: 220383273 - 220384637                                                                                                                                                  | 98.14                                              | 98.14              | 1     |
| 9      | 1p             | 30974  | 43068  | 12095  | chr1: 220385665 - 220399178<br>chr1: 239483436 - 239496859                                                                                                                   | 97.21<br>97.36                                     | 97.28              | 1     |
| 10     | 1p             | 44765  | 45785  | 1021   | chr14: 32023058 - 32024075                                                                                                                                                   | 93                                                 | 93                 | 0     |
| 11     | 1p             | 48942  | 58649  | 9708   | chr4: 119695468 - 119705181                                                                                                                                                  | 97.33                                              | 97.33              | 0     |
| 12     | 1p             | 48942  | 62722  | 13781  | chr1: 220399178 - 220412991<br>chr1: 239496859 - 239510646                                                                                                                   | 97.61<br>97.38                                     | 97.5               | 1     |
| 13     | 1p             | 48942  | 147924 | 98983  | 5q: 158314 - 58545                                                                                                                                                           | 98.84                                              | 98.84              | 0     |
| 14     | 1p             | 52507  | 62722  | 10216  | 16q: 23961 - 13817                                                                                                                                                           | 97.58                                              | 97.58              | 0     |
| 15     | 1p             | 54485  | 62722  | 8238   | 2q: 8258 - 107                                                                                                                                                               | 97.46                                              | 97.46              | 0     |
| 16     | 1p             | 58653  | 62722  | 4070   | chr4: 119944731 - 119948842                                                                                                                                                  | 97.51                                              | 97.51              | 0     |
| 17     | 1p             | 70481  | 145957 | 75477  | 6p: 16681 - 87328                                                                                                                                                            | 98.17                                              | 98.17              | 0     |
| 18     | 1p             | 70481  | 147924 | 77444  | 19p: 68278 - 145776                                                                                                                                                          | 98.72                                              | 98.72              | 0     |
| 19     | 1p             | 70845  | 112213 | 41369  | 15q: 116787 - 75007                                                                                                                                                          | 98                                                 | 98                 | 0     |
| 20     | 1p             | 71832  | 147924 | 76093  | 11p: 1 - 75496                                                                                                                                                               | 98.67                                              | 98.67              | 0     |
| 21     | 1p             | 115941 | 141190 | 25250  | chrY: 25847059 - 25878360<br>chrY: 24760333 - 24791629                                                                                                                       | 95.87<br>95.89                                     | 95.88              | 0     |
| 22     | 1p             | 115941 | 144518 | 28578  | 7p: 2360 - 32053                                                                                                                                                             | 98.39                                              | 98.39              | 0     |
| 23     | 1p             | 115941 | 146624 | 30684  | 20q: 46227 - 21029<br>chr10: 38769794 - 38800932<br>chr4: 119904851 - 119936314<br>chr1: 239518849 - 239549639                                                               | 97.41<br>96.56<br>96.47<br>97.06                   | 96.88              | 1     |
| 24     | 1p             | 116486 | 130948 | 14463  | chr4: 165542477 - 165556842                                                                                                                                                  | 95.61                                              | 95.61              | 0     |
| 25     | 1p             | 116486 | 136356 | 19871  | 2q: 37420 - 17207                                                                                                                                                            | 96.97                                              | 96.97              | 0     |
| 26     | 1p             | 116486 | 139987 | 23502  | chr1: 220421937 - 220445916                                                                                                                                                  | 97.25                                              | 97.25              | 1     |
| 27     | 1p             | 116486 | 147924 | 31439  | 16q: 66298 - 32910                                                                                                                                                           | 98.35                                              | 98.35              | 0     |
| 28     | 1p             | 126107 | 128002 | 1896   | chr1: 224457879 - 224459772                                                                                                                                                  | 97.23                                              | 97.23              | 1     |
| 29     | 1p             | 126808 | 147924 | 21117  | 3q: 21199 - 1                                                                                                                                                                | 98.99                                              | 98.99              | 0     |
| 30     | 1p             | 128449 | 141190 | 12742  | chr1: 224467506 - 224480262                                                                                                                                                  | 96.89                                              | 96.89              | 1     |
| 31     | 1p             | 131997 | 140893 | 8897   | chr7: 55985248 - 55994150                                                                                                                                                    | 94.68                                              | 94.68              | 0     |
| 32     | 1p             | 132000 | 134020 | 2021   | chr7: 61805021 - 61806480<br>chr1: 193837523 - 193839718<br>chr7: 55420846 - 55423188                                                                                        | 92.69<br>92.72<br>92.81                            | 92.74              | 1     |
| 33     | 1p             | 132020 | 138740 | 6721   | chr7: 45414266 - 45420987                                                                                                                                                    | 94.61                                              | 94.61              | 0     |
| 34     | 1p             | 135982 | 146847 | 10866  | chr7: 127667204 - 127677946                                                                                                                                                  | 96.65                                              | 96.65              | 0     |
| 35     | 1p             | 136001 | 138740 | 2740   | chr7: 51009103 - 51011866<br>chr7: 55363599 - 55366358<br>chr7: 56432157 - 56434907<br>chr7: 39393644 - 39396387<br>chr7: 62457999 - 62460749<br>chr1: 219029846 - 219032485 | 93.00<br>94.00<br>94.00<br>93.00<br>94.00<br>97.00 | 94.17              | 1     |
| 36     | 1p             | 137311 | 146847 | 9537   | chr4: 120680507 - 120690600<br>chr7: 56434997 - 56436149                                                                                                                     | 95.39<br>94.56                                     | 95.39              | 0     |
| 37     | 1p             | 138830 | 140589 | 1760   | chr1: 219032574 - 219033728<br>chr7: 55366448 - 55368463<br>chr7: 62455575 - 62457909<br>chr7: 51011956 - 51014002<br>chr7: 39391514 - 39393554                              | 96.97<br>94.72<br>94.37<br>94.85<br>95.38          | 95.14              | 1     |
| 38     | 1p             | 138830 | 145546 | 6717   | chr7: 45403637 - 45414176                                                                                                                                                    | 95.05                                              | 95.05              | 0     |
| 39     | 1p             | 140895 | 145546 | 4652   | chr1: 224460233 - 224466670                                                                                                                                                  | 94.41                                              | 94.41              | 1     |
| 40     | 1p             | 144251 | 145546 | 1296   | chr7: 51020104 - 51021398                                                                                                                                                    | 95.75                                              | 95.75              | 0     |

|    |    |        |        |       |                                                                                                                                                                                                                                                                                                             |                                                                                        |       |   |
|----|----|--------|--------|-------|-------------------------------------------------------------------------------------------------------------------------------------------------------------------------------------------------------------------------------------------------------------------------------------------------------------|----------------------------------------------------------------------------------------|-------|---|
| 41 | 1p | 144252 | 146847 | 2596  | chr7: 55375429 - 55378337<br>chr7: 56005902 - 56008498<br>chr7: 39386597 - 39389187<br>chr1: 219039323 - 219041921<br>chr1: 220447184 - 220449733                                                                                                                                                           | 96.62<br>96.56<br>95.95<br>96.63<br>98.06                                              | 96.76 | 1 |
| 42 | 1p | 144957 | 147924 | 2968  | 7p: 32493 - 35468                                                                                                                                                                                                                                                                                           | 97.72                                                                                  | 97.72 | 0 |
| 43 | 1p | 147657 | 148954 | 1298  | chr7: 45403637 - 45404932<br>chr1: 224460233 - 224461546                                                                                                                                                                                                                                                    | 96.38<br>95.07                                                                         | 95.72 | 1 |
| 44 | 1p | 147728 | 150225 | 2498  | chr7: 55375429 - 55378283<br>chr7: 56005902 - 56008474<br>chr7: 39386621 - 39389187<br>chr7: 127667228 - 127669796<br>chr10: 38769818 - 38772390<br>chr4: 120688005 - 120690576<br>chr4: 119904875 - 119907443<br>chr1: 219039323 - 219041897<br>chr1: 239547046 - 239549615<br>chr1: 220447854 - 220449709 | 96.48<br>95.95<br>95.26<br>97.58<br>95.83<br>95.67<br>95.36<br>96.03<br>97.33<br>97.81 | 96.33 | 1 |
| 45 | 1p | 147895 | 151331 | 3437  | 11p: 71805 - 75496<br>5q: 158314 - 154639<br>3q: 21199 - 17517<br>16q: 66298 - 62611<br>7p: 32499 - 35468<br>19p: 142809 - 145776                                                                                                                                                                           | 97.75<br>98.91<br>98.03<br>97.95<br>97.41<br>98.03                                     | 98.01 | 0 |
| 46 | 1p | 151063 | 152515 | 1453  | chr7: 45403637 - 45404932<br>chr10: 38771094 - 38772390<br>chr4: 119906144 - 119907443<br>chr1: 224460233 - 224461546<br>chr7: 39387491 - 39389187<br>chr7: 127668095 - 127669796<br>5q: 156343 - 154639<br>chr7: 51020104 - 51021398                                                                       | 96.00<br>95.59<br>95.57<br>94.70<br>95.44<br>97.99<br>98.58<br>94.95                   | 96.1  | 1 |
| 47 | 1p | 151063 | 191186 | 40124 | 7p: 31783 - 71832<br>11p: 71805 - 111964<br>19p: 142094 - 182218                                                                                                                                                                                                                                            | 98.30<br>98.43<br>98.37                                                                | 98.37 | 0 |
| 48 | 1p | 151065 | 153642 | 2578  | chr7: 55375429 - 55378283<br>16q: 65198 - 62611<br>chr7: 56005902 - 56008476<br>3q: 20099 - 17517<br>chr4: 120688005 - 120690578<br>chr1: 219039323 - 219041899<br>chr1: 239547046 - 239549617<br>chr1: 220447184 - 220449711                                                                               | 96.28<br>97.48<br>95.93<br>98.01<br>95.84<br>96.12<br>97.13<br>97.77                   | 96.82 | 1 |
| 49 | 1p | 153070 | 185365 | 32296 | 5q: 189359 - 156637                                                                                                                                                                                                                                                                                         | 98.4                                                                                   | 98.4  | 0 |
| 50 | 1p | 154479 | 171037 | 16559 | chr7: 56005902 - 56027313                                                                                                                                                                                                                                                                                   | 92.97                                                                                  | 92.97 | 0 |
| 51 | 1p | 154479 | 188802 | 34324 | chr1: 219039323 - 219081989                                                                                                                                                                                                                                                                                 | 97.3                                                                                   | 97.3  | 1 |
| 52 | 1p | 154479 | 191186 | 36708 | 3q: 57717 - 20931<br>16q: 102624 - 66030                                                                                                                                                                                                                                                                    | 98.44<br>98.38                                                                         | 98.41 | 0 |
| 53 | 1p | 154479 | 192623 | 38145 | chr1: 239547046 - 239591053                                                                                                                                                                                                                                                                                 | 97.3                                                                                   | 97.3  | 1 |
| 54 | 1p | 154479 | 198083 | 43605 | chr4: 120688005 - 120742610                                                                                                                                                                                                                                                                                 | 96.55                                                                                  | 96.55 | 0 |
| 55 | 1p | 154526 | 157234 | 2709  | chr7: 55375429 - 55383906<br>chr7: 56015725 - 56026447                                                                                                                                                                                                                                                      | 93.85<br>90.67                                                                         | 92.26 | 0 |
| 56 | 1p | 156853 | 197632 | 40780 | chr10: 38723054 - 38764372                                                                                                                                                                                                                                                                                  | 96.98                                                                                  | 96.98 | 0 |
| 57 | 1p | 156858 | 173095 | 16238 | chr7: 127645453 - 127661758                                                                                                                                                                                                                                                                                 | 96.14                                                                                  | 96.14 | 0 |
| 58 | 1p | 156858 | 178230 | 21373 | chr7: 39360178 - 39381110                                                                                                                                                                                                                                                                                   | 93                                                                                     | 93    | 0 |
| 59 | 1p | 156858 | 182943 | 26086 | chr1: 220455168 - 220481396                                                                                                                                                                                                                                                                                 | 97.88                                                                                  | 97.88 | 1 |
| 60 | 1p | 156858 | 192623 | 35766 | chr4: 119869229 - 119899413                                                                                                                                                                                                                                                                                 | 97.49                                                                                  | 97.49 | 0 |
| 61 | 1p | 156882 | 161096 | 4215  | chr7: 45392682 - 45396890                                                                                                                                                                                                                                                                                   | 96.06                                                                                  | 96.06 | 0 |
| 62 | 1p | 158227 | 163866 | 5640  | chr11: 49997861 - 50003428<br>chr7: 56475714 - 56481294<br>chr7: 62412186 - 62417768<br>chr7: 64516409 - 64521893<br>chr7: 51029490 - 51036010                                                                                                                                                              | 90.00<br>90.88<br>90.88<br>91.16<br>92.62                                              | 91.11 | 0 |
| 63 | 1p | 158357 | 161096 | 2740  | chr7: 55385504 - 55388239                                                                                                                                                                                                                                                                                   | 94.41                                                                                  | 94.41 | 0 |
| 64 | 1p | 160844 | 170174 | 9331  | chr7: 65587537 - 65593232                                                                                                                                                                                                                                                                                   | 91.45                                                                                  | 91.45 | 0 |

|    |    |        |        |       |                                                                                                                                                                                                                                                                                                                                                                                                                                                     |                                                                                                                                                                                  |       |   |
|----|----|--------|--------|-------|-----------------------------------------------------------------------------------------------------------------------------------------------------------------------------------------------------------------------------------------------------------------------------------------------------------------------------------------------------------------------------------------------------------------------------------------------------|----------------------------------------------------------------------------------------------------------------------------------------------------------------------------------|-------|---|
| 65 | 1p | 164330 | 169875 | 5546  | chr7: 64511343 - 64515807                                                                                                                                                                                                                                                                                                                                                                                                                           | 91.43                                                                                                                                                                            | 91.43 | 0 |
| 66 | 1p | 169656 | 191186 | 21531 | 9q: 22260 - 834                                                                                                                                                                                                                                                                                                                                                                                                                                     | 98.29                                                                                                                                                                            | 98.29 | 0 |
| 67 | 1p | 169940 | 198083 | 28144 | chr7: 45352592 - 45389874                                                                                                                                                                                                                                                                                                                                                                                                                           | 96.19                                                                                                                                                                            | 96.19 | 0 |
| 68 | 1p | 172348 | 173830 | 1483  | chr7: 64507178 - 64508843                                                                                                                                                                                                                                                                                                                                                                                                                           | 92.35                                                                                                                                                                            | 92.35 | 0 |
| 69 | 1p | 172832 | 178286 | 5455  | chr7: 56029594 - 56035175                                                                                                                                                                                                                                                                                                                                                                                                                           | 93.01                                                                                                                                                                            | 93.01 | 0 |
| 70 | 1p | 179165 | 180280 | 1116  | chr7: 56036051 - 56037182                                                                                                                                                                                                                                                                                                                                                                                                                           | 92.82                                                                                                                                                                            | 92.82 | 0 |
| 71 | 1p | 180241 | 188802 | 8562  | chr7: 127636388 - 127644996                                                                                                                                                                                                                                                                                                                                                                                                                         | 95.34                                                                                                                                                                            | 95.34 | 0 |
| 72 | 1p | 182809 | 184294 | 1486  | chr7: 75222310 - 75223815<br>chr7: 65540948 - 65542445                                                                                                                                                                                                                                                                                                                                                                                              | 92.76<br>94.07                                                                                                                                                                   | 93.41 | 0 |
| 73 | 1p | 185854 | 187122 | 1269  | chr7: 64469009 - 64470133<br>chr7: 63774859 - 63776045                                                                                                                                                                                                                                                                                                                                                                                              | 90.32<br>90.41                                                                                                                                                                   | 90.36 | 0 |
| 74 | 1p | 187408 | 198083 | 10676 | chr1: 220481705 - 220501430                                                                                                                                                                                                                                                                                                                                                                                                                         | 97.38                                                                                                                                                                            | 97.38 | 1 |
| 75 | 1p | 190744 | 196652 | 5909  | chr11: 50204185 - 50210330                                                                                                                                                                                                                                                                                                                                                                                                                          | 92.36                                                                                                                                                                            | 92.36 | 0 |
| 76 | 1p | 194962 | 197534 | 2573  | chr7: 62184405 - 62186779<br>chr7: 56736665 - 56739034<br>chr7: 61936467 - 61938837<br>chr7: 35460461 - 35474160                                                                                                                                                                                                                                                                                                                                    | 92.15<br>92.15<br>92.11<br>91.99                                                                                                                                                 | 92.1  | 0 |
| 77 | 1p | 205659 | 213212 | 7554  | chr1: 220510992 - 220518541                                                                                                                                                                                                                                                                                                                                                                                                                         | 97.91                                                                                                                                                                            | 97.91 | 1 |
| 78 | 1p | 205679 | 229635 | 23957 | 8p: 329082 - 353117                                                                                                                                                                                                                                                                                                                                                                                                                                 | 96.52                                                                                                                                                                            | 96.52 | 0 |
| 79 | 1p | 213342 | 229635 | 16294 | chr1: 220518672 - 220534939                                                                                                                                                                                                                                                                                                                                                                                                                         | 97.99                                                                                                                                                                            | 97.99 | 1 |
| 80 | 1p | 218996 | 229635 | 10640 | 2q: 48198 - 37437                                                                                                                                                                                                                                                                                                                                                                                                                                   | 97.96                                                                                                                                                                            | 97.96 | 0 |
| 81 | 1p | 231380 | 233742 | 2363  | 8p: 279211 - 281570                                                                                                                                                                                                                                                                                                                                                                                                                                 | 97.7                                                                                                                                                                             | 97.7  | 0 |
| 82 | 1p | 238096 | 242735 | 4640  | 8p: 134360 - 138988                                                                                                                                                                                                                                                                                                                                                                                                                                 | 98.07                                                                                                                                                                            | 98.07 | 0 |
| 83 | 1p | 241682 | 242735 | 1054  | 6q: 134337 - 133279                                                                                                                                                                                                                                                                                                                                                                                                                                 | 98.36                                                                                                                                                                            | 98.36 | 0 |
| 84 | 1p | 245037 | 280290 | 35254 | 8p: 194471 - 231807                                                                                                                                                                                                                                                                                                                                                                                                                                 | 97.08                                                                                                                                                                            | 97.08 | 0 |
| 85 | 1p | 281460 | 283440 | 1981  | 21q: 19448 - 17848<br>18p: 91016 - 93277<br>10q: 19834 - 17578<br>22q: 18168 - 15901<br>4p: 14074 - 15591<br>4q: 7234 - 5717<br>19q: 15185 - 12919<br>16q: 6877 - 4620<br>chr2: 114093391 - 114095655<br>6p: 91533 - 93673<br>1q: 11022 - 8975<br>7p: 71845 - 73566<br>11p: 111977 - 113702<br>3q: 59455 - 57730<br>9q: 23994 - 22273<br>19p: 182231 - 183954<br>16q: 104358 - 102637<br>8p: 105117 - 106839<br>2p: 2251 - 5049<br>18p: 1669 - 6845 | 95.00<br>95.18<br>94.52<br>95.67<br>93.36<br>93.26<br>96.00<br>95.78<br>95.93<br>92.75<br>93.70<br>96.51<br>97.19<br>97.19<br>96.51<br>97.10<br>96.51<br>96.78<br>96.72<br>93.41 | 95.25 | 1 |
| 86 | 1p | 284104 | 286515 | 2412  | chr1: 224030580 - 224037287<br>10p: 125 - 2430<br>chr2: 132394854 - 132397167<br>chr22: 14844304 - 14846620<br>chr14: 18425318 - 18427632<br>chr12: 34147807 - 34150020                                                                                                                                                                                                                                                                             | 91.12<br>93.81<br>93.77<br>93.77<br>93.86<br>91.88                                                                                                                               | 93.09 | 1 |
| 87 | 1p | 287192 | 293392 | 6201  | 4q: 127186 - 121253                                                                                                                                                                                                                                                                                                                                                                                                                                 | 93.17                                                                                                                                                                            | 93.17 | 0 |
| 88 | 1p | 287195 | 288715 | 1521  | 16q: 133323 - 131398<br>chr12: 36874324 - 36875442                                                                                                                                                                                                                                                                                                                                                                                                  | 93.18<br>90.00                                                                                                                                                                   | 91.59 | 0 |
| 89 | 1p | 287201 | 301425 | 14225 | 18p: 17567 - 38559<br>10p: 13173 - 34166<br>9q: 82885 - 65244<br>3q: 115912 - 100958                                                                                                                                                                                                                                                                                                                                                                | 93.46<br>93.46<br>93.78<br>93.84                                                                                                                                                 | 93.64 | 0 |
| 90 | 1p | 288354 | 296670 | 8317  | chr12: 34182787 - 34200623                                                                                                                                                                                                                                                                                                                                                                                                                          | 90.42                                                                                                                                                                            | 90.42 | 0 |
| 91 | 1p | 293260 | 295734 | 2475  | chr1: 238554207 - 238558412                                                                                                                                                                                                                                                                                                                                                                                                                         | 91.14                                                                                                                                                                            | 91.14 | 1 |
| 92 | 1p | 293274 | 304945 | 11672 | chrY: 10561453 - 10577074                                                                                                                                                                                                                                                                                                                                                                                                                           | 92.96                                                                                                                                                                            | 92.96 | 0 |
| 93 | 1p | 295513 | 296696 | 1184  | chrY: 18946969 - 18958077<br>chrY: 18047953 - 18059059                                                                                                                                                                                                                                                                                                                                                                                              | 91.00<br>91.00                                                                                                                                                                   | 91    | 0 |
| 94 | 1p | 301880 | 304623 | 2744  | chr1: 5649685 - 5661440                                                                                                                                                                                                                                                                                                                                                                                                                             | 93.19                                                                                                                                                                            | 93.19 | 1 |
| 95 | 1p | 305118 | 309301 | 4184  | chr3: 75933584 - 75937820                                                                                                                                                                                                                                                                                                                                                                                                                           | 95.04                                                                                                                                                                            | 95.04 | 0 |

|     |    |        |        |       |                                                                                                                                                                                                                                                                                  |                                                                                                          |       |   |
|-----|----|--------|--------|-------|----------------------------------------------------------------------------------------------------------------------------------------------------------------------------------------------------------------------------------------------------------------------------------|----------------------------------------------------------------------------------------------------------|-------|---|
| 96  | 1p | 357462 | 373002 | 15541 | chr2: 130701507 - 130704726                                                                                                                                                                                                                                                      | 94.88                                                                                                    | 94.88 | 0 |
| 97  | 1p | 357462 | 373273 | 15812 | chr2: 132032476 - 132035943                                                                                                                                                                                                                                                      | 93.73                                                                                                    | 93.73 | 0 |
| 98  | 1q | 1764   | 12469  | 10706 | 10q: 21274 - 8629<br>22q: 19698 - 6932<br>chr2: 114084410 - 114097183<br>19q: 16715 - 3954                                                                                                                                                                                       | 93.99<br>94.40<br>94.47<br>94.69                                                                         | 94.39 | 0 |
| 99  | 1q | 1764   | 10576  | 8813  | 21q: 19448 - 8673                                                                                                                                                                                                                                                                | 95.16                                                                                                    | 95.16 | 0 |
| 100 | 1q | 1764   | 4813   | 3050  | chr3: 75756447 - 75760281                                                                                                                                                                                                                                                        | 94.34                                                                                                    | 94.34 | 0 |
| 101 | 1q | 1786   | 8975   | 7190  | 5q: 11967 - 5746<br>17q: 16452 - 8455<br>8p: 116333 - 122565<br>6q: 6141 - 1                                                                                                                                                                                                     | 94.87<br>94.81<br>93.30<br>95.01                                                                         | 94.5  | 0 |
| 102 | 1q | 4691   | 9184   | 4494  | 19p: 193602 - 199397                                                                                                                                                                                                                                                             | 94.71                                                                                                    | 94.71 | 0 |
| 103 | 1q | 4691   | 7881   | 3191  | 6q: 147506 - 145675                                                                                                                                                                                                                                                              | 90.83                                                                                                    | 90.83 | 0 |
| 104 | 1q | 4692   | 15422  | 10731 | 4p: 7723 - 22772<br>13q: 5935 - 1401                                                                                                                                                                                                                                             | 92.86<br>91.64                                                                                           | 92.25 | 0 |
| 105 | 1q | 7033   | 15422  | 8390  | 5p: 617 - 8075<br>4q: 11634 - 2781                                                                                                                                                                                                                                               | 93.67<br>92.09                                                                                           | 92.88 | 0 |
| 106 | 1q | 7394   | 12244  | 4851  | 16q: 7774 - 1705<br>18p: 88797 - 95146                                                                                                                                                                                                                                           | 93.09<br>92.65                                                                                           | 92.87 | 0 |
| 107 | 1q | 8975   | 28891  | 19917 | 6p: 91611 - 105620                                                                                                                                                                                                                                                               | 94.06                                                                                                    | 94.06 | 0 |
| 108 | 1q | 9143   | 11119  | 1977  | 1p: 281407 - 283465<br>16q: 104535 - 102637                                                                                                                                                                                                                                      | 93.50<br>93.47                                                                                           | 93.48 | 1 |
| 109 | 1q | 9311   | 12434  | 3124  | 19p: 182231 - 185064<br>11p: 111977 - 115229<br>7p: 71845 - 75097<br>9q: 25525 - 22273<br>3q: 60982 - 57730<br>8p: 105117 - 107957                                                                                                                                               | 93.68<br>93.08<br>93.29<br>93.19<br>93.25<br>93.49                                                       | 93.33 | 0 |
| 110 | 1q | 9569   | 15422  | 5854  | 2p: 3280 - 10453                                                                                                                                                                                                                                                                 | 91.63                                                                                                    | 91.63 | 0 |
| 111 | 1q | 165119 | 167249 | 2131  | chr8: 95806410 - 95869973                                                                                                                                                                                                                                                        | 91.24                                                                                                    | 91.24 | 0 |
| 112 | 1q | 283789 | 318216 | 34428 | chr1: 244914453 - 244949099                                                                                                                                                                                                                                                      | 97.7                                                                                                     | 97.7  | 1 |
| 113 | 2p | 2614   | 23214  | 20601 | 13q: 15153 - 1374                                                                                                                                                                                                                                                                | 91.5                                                                                                     | 91.5  | 0 |
| 114 | 2p | 2615   | 7987   | 5373  | 4p: 7699 - 18608                                                                                                                                                                                                                                                                 | 91.93                                                                                                    | 91.93 | 0 |
| 115 | 2p | 2635   | 17320  | 14686 | 21q: 20521 - 12379                                                                                                                                                                                                                                                               | 93.36                                                                                                    | 93.36 | 0 |
| 116 | 2p | 2945   | 10453  | 7509  | 1q: 15422 - 4691<br>6p: 92174 - 98867                                                                                                                                                                                                                                            | 91.72<br>91.39                                                                                           | 91.56 | 0 |
| 117 | 2p | 3123   | 6333   | 3211  | 10q: 21274 - 12303<br>19q: 16715 - 7670<br>22q: 19698 - 10660<br>16q: 104535 - 102867<br>19p: 182461 - 185064<br>8p: 105346 - 107957<br>11p: 112207 - 115229<br>3q: 60982 - 57960<br>9q: 25525 - 22503<br>7p: 72075 - 75097<br>18p: 91812 - 94731<br>chr2: 114094473 - 114097183 | 92.82<br>92.07<br>92.30<br>91.43<br>91.91<br>92.54<br>92.08<br>92.08<br>91.70<br>91.70<br>92.23<br>91.75 | 92.05 | 1 |
| 118 | 2p | 3689   | 5486   | 1798  | 1p: 281971 - 283465<br>16q: 7770 - 5957                                                                                                                                                                                                                                          | 91.20<br>92.01                                                                                           | 91.61 | 0 |
| 119 | 2p | 4878   | 6584   | 1707  | 4q: 8797 - 7063                                                                                                                                                                                                                                                                  | 92.03                                                                                                    | 92.03 | 0 |
| 120 | 2p | 6456   | 17877  | 11422 | 5p: 2293 - 16944                                                                                                                                                                                                                                                                 | 91.64                                                                                                    | 91.64 | 0 |
| 121 | 2p | 9594   | 11886  | 2293  | 4q: 13056 - 10778                                                                                                                                                                                                                                                                | 90.51                                                                                                    | 90.51 | 0 |
| 122 | 2p | 9594   | 14710  | 5117  | 4p: 21916 - 27322                                                                                                                                                                                                                                                                | 91.16                                                                                                    | 91.16 | 0 |
| 123 | 2p | 89266  | 91971  | 2706  | 21q: 26137 - 23656                                                                                                                                                                                                                                                               | 92.95                                                                                                    | 92.95 | 0 |
| 124 | 2p | 155328 | 164148 | 8821  | chr3: 197233860 - 197243557                                                                                                                                                                                                                                                      | 93.02                                                                                                    | 93.02 | 0 |
| 125 | 2p | 155328 | 168204 | 12877 | 5p: 18771 - 31689                                                                                                                                                                                                                                                                | 92.68                                                                                                    | 92.68 | 0 |
| 126 | 2p | 266803 | 268101 | 1299  | chr1: 230277578 - 230278744                                                                                                                                                                                                                                                      | 93.72                                                                                                    | 93.72 | 0 |
| 127 | 2q | 79     | 37420  | 37342 | 16q: 52766 - 15778<br>chrY: 25830407 - 25873515<br>chrY: 24765178 - 24808289                                                                                                                                                                                                     | 97.75<br>96.29<br>96.31                                                                                  | 96.78 | 0 |
| 128 | 2q | 107    | 14732  | 14626 | chr1: 239502401 - 239517107                                                                                                                                                                                                                                                      | 96.81                                                                                                    | 96.81 | 0 |

|     |    |        |        |       |                                                                                                                                     |                                           |       |   |
|-----|----|--------|--------|-------|-------------------------------------------------------------------------------------------------------------------------------------|-------------------------------------------|-------|---|
| 129 | 2q | 107    | 8258   | 8152  | 5q: 72329 - 64090<br>1p: 54485 - 62722<br>chr1: 220404716 - 220412991<br>6q: 64494 - 56258<br>8p: 21631 - 29862                     | 97.81<br>97.60<br>97.80<br>97.81<br>97.74 | 97.75 | 0 |
| 130 | 2q | 107    | 4174   | 4068  | chr4: 119695468 - 119699622                                                                                                         | 97.41                                     | 97.41 | 0 |
| 131 | 2q | 4178   | 37417  | 33240 | chr4: 119915974 - 119948842                                                                                                         | 97.12                                     | 97.12 | 0 |
| 132 | 2q | 9926   | 37420  | 27495 | chr10: 38780554 - 38807668                                                                                                          | 96.91                                     | 96.91 | 0 |
| 133 | 2q | 10787  | 20769  | 9983  | chr1: 220415524 - 220425497                                                                                                         | 97.78                                     | 97.78 | 0 |
| 134 | 2q | 11804  | 31737  | 19934 | chr4: 165537042 - 165556804                                                                                                         | 95.95                                     | 95.95 | 0 |
| 135 | 2q | 14584  | 37420  | 22837 | 7p: 91 - 22770<br>20q: 41420 - 18783<br>chr1: 239517108 - 239539374                                                                 | 97.58<br>97.61<br>97.38                   | 97.52 | 0 |
| 136 | 2q | 17207  | 37420  | 20214 | 11p: 43725 - 63564<br>5q: 146656 - 126807<br>19p: 113350 - 133490<br>6p: 62675 - 82522                                              | 97.62<br>97.53<br>97.46<br>97.23          | 97.46 | 0 |
| 137 | 2q | 17207  | 35177  | 17971 | 8p: 86034 - 103892                                                                                                                  | 97.23                                     | 97.23 | 0 |
| 138 | 2q | 17207  | 28265  | 11059 | 6q: 133270 - 122211                                                                                                                 | 97.75                                     | 97.75 | 0 |
| 139 | 2q | 17207  | 20769  | 3563  | 1p: 116486 - 120046                                                                                                                 | 97.72                                     | 97.72 | 0 |
| 140 | 2q | 20913  | 37420  | 16508 | chr1: 220425641 - 220442288                                                                                                         | 97.24                                     | 97.24 | 0 |
| 141 | 2q | 20913  | 22092  | 1180  | 1p: 120190 - 121369                                                                                                                 | 98.67                                     | 98.67 | 0 |
| 142 | 2q | 25664  | 37420  | 11757 | 1p: 124946 - 136356                                                                                                                 | 97.06                                     | 97.06 | 0 |
| 143 | 2q | 26855  | 28809  | 1955  | chr1: 224457827 - 224459772                                                                                                         | 96.88                                     | 96.88 | 0 |
| 144 | 2q | 27564  | 37420  | 9857  | 3q: 9502 - 1                                                                                                                        | 97.47                                     | 97.47 | 0 |
| 145 | 2q | 29178  | 37420  | 8243  | chr1: 224472349 - 224480262                                                                                                         | 97.08                                     | 97.08 | 0 |
| 146 | 2q | 32817  | 34583  | 1767  | chr7: 61805021 - 61806470<br>chr1: 193837523 - 193838976<br>chr7: 55420846 - 55423188                                               | 92.52<br>92.35<br>92.75                   | 92.54 | 0 |
| 147 | 2q | 32825  | 37420  | 4596  | chr7: 55985248 - 55989644<br>chr7: 45416639 - 45420987                                                                              | 95.89<br>96.77                            | 96.33 | 0 |
| 148 | 2q | 37437  | 48245  | 10809 | 1p: 218996 - 229635<br>chr1: 220524327 - 220535034                                                                                  | 98.27<br>97.74                            | 98    | 0 |
| 149 | 2q | 37438  | 91777  | 54340 | 8p: 290588 - 339694                                                                                                                 | 96.28                                     | 96.28 | 0 |
| 150 | 2q | 113376 | 130689 | 17314 | chr8: 70400743 - 70415059                                                                                                           | 91.27                                     | 91.27 | 0 |
| 151 | 2q | 123778 | 130109 | 6332  | chr5: 1658875 - 1664417<br>5p: 274416 - 281490                                                                                      | 91.30<br>92.02                            | 91.66 | 0 |
| 152 | 2q | 127244 | 130638 | 3395  | chr3: 196868578 - 196872736                                                                                                         | 92.6                                      | 92.6  | 0 |
| 153 | 2q | 127253 | 129369 | 2117  | chr3: 197206782 - 197208724                                                                                                         | 92.28                                     | 92.28 | 0 |
| 154 | 2q | 127259 | 137427 | 10169 | chr3: 198844371 - 198861538                                                                                                         | 92.86                                     | 92.86 | 0 |
| 155 | 2q | 129544 | 130680 | 1137  | chr9: 136942169 - 136943924                                                                                                         | 92.33                                     | 92.33 | 0 |
| 156 | 2q | 130470 | 138715 | 8246  | 5p: 262223 - 274318<br>chr5: 1665247 - 1678396                                                                                      | 92.81<br>94.03                            | 93.42 | 0 |
| 157 | 2q | 130535 | 139193 | 8659  | chr3: 197151348 - 197162783                                                                                                         | 92.22                                     | 92.22 | 0 |
| 158 | 3p | 25836  | 27430  | 1595  | chr3: 75358906 - 75362529                                                                                                           | 95.58                                     | 95.58 | 1 |
| 159 | 3p | 27552  | 30982  | 3431  | chr3: 75362651 - 75370581                                                                                                           | 93.46                                     | 93.46 | 1 |
| 160 | 3p | 31906  | 33277  | 1372  | chr3: 75371501 - 75372877                                                                                                           | 96.22                                     | 96.22 | 1 |
| 161 | 3p | 33334  | 36566  | 3233  | chr3: 75372933 - 75376158                                                                                                           | 95.02                                     | 95.02 | 1 |
| 162 | 3p | 37417  | 66238  | 28822 | chr3: 75377008 - 75411740                                                                                                           | 95.3                                      | 95.3  | 1 |
| 163 | 3q | 1      | 87720  | 87720 | 16q: 131364 - 43247<br>7p: 13255 - 102116                                                                                           | 98.41<br>98.45                            | 98.43 | 0 |
| 164 | 3q | 1      | 75708  | 75708 | 11p: 54057 - 128459                                                                                                                 | 98.67                                     | 98.67 | 0 |
| 165 | 3q | 1      | 60961  | 60961 | 19p: 123991 - 185461                                                                                                                | 98.73                                     | 98.73 | 0 |
| 166 | 3q | 1      | 51879  | 51879 | 5q: 189359 - 137159                                                                                                                 | 98.61                                     | 98.61 | 0 |
| 167 | 3q | 1      | 21199  | 21199 | 1p: 126808 - 147924                                                                                                                 | 98.99                                     | 98.99 | 0 |
| 168 | 3q | 1      | 19763  | 19763 | 6p: 72998 - 87328<br>20q: 46227 - 31895<br>chr1: 239529853 - 239549639<br>chr10: 38769794 - 38790071<br>chr4: 119904851 - 119925461 | 97.91<br>97.84<br>97.19<br>96.82<br>97.02 | 97.36 | 0 |
| 169 | 3q | 1      | 14339  | 14339 | chrY: 24760333 - 24774734<br>chrY: 25863958 - 25878360                                                                              | 95.96<br>95.94                            | 95.95 | 0 |
| 170 | 3q | 1      | 13137  | 13137 | chr1: 220432757 - 220445916                                                                                                         | 97.49                                     | 97.49 | 0 |
| 171 | 3q | 1      | 9502   | 9502  | 2q: 37420 - 27564                                                                                                                   | 97.1                                      | 97.1  | 0 |
| 172 | 3q | 1      | 7525   | 7525  | 8p: 96353 - 103892                                                                                                                  | 98.57                                     | 98.57 | 0 |

|     |    |       |        |       |                                                                                                                                                                              |                                                    |       |   |
|-----|----|-------|--------|-------|------------------------------------------------------------------------------------------------------------------------------------------------------------------------------|----------------------------------------------------|-------|---|
| 173 | 3q | 1     | 1249   | 1249  | chr1: 224457827 - 224459071                                                                                                                                                  | 98                                                 | 98    | 0 |
| 174 | 3q | 4     | 3716   | 3713  | chr4: 165552704 - 165556462                                                                                                                                                  | 95.58                                              | 95.58 | 0 |
| 175 | 3q | 1594  | 14339  | 12746 | chr1: 224467506 - 224480262                                                                                                                                                  | 96.85                                              | 96.85 | 0 |
| 176 | 3q | 5148  | 14042  | 8895  | chr7: 55985248 - 55994150                                                                                                                                                    | 94.51                                              | 94.51 | 0 |
| 177 | 3q | 5151  | 7171   | 2021  | chr7: 61805021 - 61806472<br>chr1: 193837523 - 193839718<br>chr7: 55420846 - 55423188                                                                                        | 91.84<br>92.63<br>92.44                            | 92.3  | 0 |
| 178 | 3q | 5171  | 11886  | 6716  | chr7: 45414266 - 45420987                                                                                                                                                    | 94.61                                              | 94.61 | 0 |
| 179 | 3q | 9134  | 20121  | 10988 | chr7: 127667204 - 127677946                                                                                                                                                  | 96.68                                              | 96.68 | 0 |
| 180 | 3q | 9153  | 11886  | 2734  | chr7: 51009103 - 51011866<br>chr7: 39393644 - 39396387<br>chr7: 62457999 - 62460749<br>chr7: 55363599 - 55366358<br>chr7: 56432157 - 56434907<br>chr1: 219029846 - 219032485 | 93.00<br>93.00<br>94.00<br>94.00<br>94.00<br>97.00 | 94.17 | 0 |
| 181 | 3q | 10457 | 20121  | 9665  | chr4: 120680507 - 120690600                                                                                                                                                  | 94.96                                              | 94.96 | 0 |
| 182 | 3q | 11976 | 18815  | 6840  | chr7: 45403637 - 45414176                                                                                                                                                    | 95.23                                              | 95.23 | 0 |
| 183 | 3q | 11976 | 13736  | 1761  | chr1: 219032574 - 219033728<br>chr7: 56434997 - 56436149<br>chr7: 62455590 - 62457909<br>chr7: 55366448 - 55368463<br>chr7: 39391514 - 39393554<br>chr7: 51011956 - 51014002 | 96.86<br>94.15<br>94.45<br>94.36<br>94.91<br>94.13 | 94.81 | 0 |
| 184 | 3q | 14044 | 18815  | 4772  | chr1: 224460233 - 224466670                                                                                                                                                  | 94.42                                              | 94.42 | 0 |
| 185 | 3q | 17517 | 25043  | 7527  | 1p: 151063 - 158591                                                                                                                                                          | 98.72                                              | 98.72 | 0 |
| 186 | 3q | 17517 | 21199  | 3683  | 1p: 147657 - 151331                                                                                                                                                          | 98.39                                              | 98.39 | 0 |
| 187 | 3q | 17520 | 18815  | 1296  | chr7: 51020104 - 51021398                                                                                                                                                    | 95.53                                              | 95.53 | 0 |
| 188 | 3q | 17521 | 20121  | 2601  | chr1: 219039323 - 219041921<br>chr7: 39386597 - 39389187<br>chr7: 55375429 - 55378337<br>chr7: 56005902 - 56008498<br>chr1: 220447184 - 220449733                            | 96.72<br>96.16<br>96.61<br>96.65<br>98.20          | 96.87 | 0 |
| 189 | 3q | 20931 | 57717  | 36787 | chr1: 239547046 - 239589627<br>chr4: 120688005 - 120730560                                                                                                                   | 97.29<br>96.44                                     | 96.87 | 0 |
| 190 | 3q | 20931 | 55324  | 34394 | chr1: 219039323 - 219081989                                                                                                                                                  | 97.25                                              | 97.25 | 0 |
| 191 | 3q | 20931 | 37501  | 16571 | chr7: 56005902 - 56027313                                                                                                                                                    | 92.93                                              | 92.93 | 0 |
| 192 | 3q | 20978 | 23681  | 2704  | chr7: 55375429 - 55383896<br>chr7: 56015725 - 56026447                                                                                                                       | 94.49<br>90.68                                     | 92.59 | 0 |
| 193 | 3q | 23307 | 57717  | 34411 | chr10: 38729667 - 38764372<br>chr4: 119870679 - 119899413                                                                                                                    | 97.09<br>97.41                                     | 97.25 | 0 |
| 194 | 3q | 23310 | 49429  | 26120 | chr1: 220455168 - 220481396                                                                                                                                                  | 97.65                                              | 97.65 | 0 |
| 195 | 3q | 23310 | 44682  | 21373 | chr7: 39360178 - 39381110                                                                                                                                                    | 92.94                                              | 92.94 | 0 |
| 196 | 3q | 23310 | 39561  | 16252 | chr7: 127645453 - 127661758                                                                                                                                                  | 95.71                                              | 95.71 | 0 |
| 197 | 3q | 23334 | 27562  | 4229  | chr7: 45392682 - 45396890                                                                                                                                                    | 95.91                                              | 95.91 | 0 |
| 198 | 3q | 23597 | 30181  | 6585  | chr7: 62412186 - 62418873                                                                                                                                                    | 91.35                                              | 91.35 | 0 |
| 199 | 3q | 24680 | 30560  | 5881  | chr7: 56475714 - 56481294<br>chr7: 51029490 - 51036010                                                                                                                       | 91.43<br>93.18                                     | 92.31 | 0 |
| 200 | 3q | 24809 | 27562  | 2754  | chr7: 55385504 - 55388239                                                                                                                                                    | 93.96                                              | 93.96 | 0 |
| 201 | 3q | 26086 | 27562  | 1477  | chr11: 49999260 - 50000805                                                                                                                                                   | 91.6                                               | 91.6  | 0 |
| 202 | 3q | 27310 | 57717  | 30408 | 1p: 160844 - 191186                                                                                                                                                          | 98.37                                              | 98.37 | 0 |
| 203 | 3q | 27310 | 36336  | 9027  | chr7: 64511343 - 64519292                                                                                                                                                    | 91.14                                              | 91.14 | 0 |
| 204 | 3q | 27310 | 30650  | 3341  | chr7: 65590242 - 65593232                                                                                                                                                    | 90.87                                              | 90.87 | 0 |
| 205 | 3q | 36117 | 119439 | 83323 | 9q: 88449 - 834                                                                                                                                                              | 97.8                                               | 97.8  | 0 |
| 206 | 3q | 36123 | 57717  | 21595 | chr7: 45368447 - 45390152                                                                                                                                                    | 96.2                                               | 96.2  | 0 |
| 207 | 3q | 38814 | 40276  | 1463  | chr7: 64507178 - 64508843                                                                                                                                                    | 92.35                                              | 92.35 | 0 |
| 208 | 3q | 39298 | 44738  | 5441  | chr7: 56029594 - 56035175                                                                                                                                                    | 92.72                                              | 92.72 | 0 |
| 209 | 3q | 45629 | 46769  | 1141  | chr7: 56036051 - 56037182                                                                                                                                                    | 92.73                                              | 92.73 | 0 |
| 210 | 3q | 46730 | 55324  | 8595  | chr7: 127636388 - 127644996                                                                                                                                                  | 95.24                                              | 95.24 | 0 |
| 211 | 3q | 49295 | 50780  | 1486  | chr7: 75222310 - 75223815<br>chr7: 65540950 - 65542445                                                                                                                       | 92.68<br>94.03                                     | 93.36 | 0 |
| 212 | 3q | 51708 | 57717  | 6010  | chr11: 50209890 - 50211058                                                                                                                                                   | 90                                                 | 90    | 0 |
| 213 | 3q | 52275 | 53636  | 1362  | chr7: 63774859 - 63776250<br>chr7: 64469009 - 64470133                                                                                                                       | 90.56<br>90.32                                     | 90.44 | 0 |
| 214 | 3q | 53922 | 57717  | 3796  | chr1: 220481705 - 220485566                                                                                                                                                  | 97.32                                              | 97.32 | 0 |

|     |    |        |        |       |                                                                                                                                                                                                                                                |                                                                                                 |       |   |
|-----|----|--------|--------|-------|------------------------------------------------------------------------------------------------------------------------------------------------------------------------------------------------------------------------------------------------|-------------------------------------------------------------------------------------------------|-------|---|
| 215 | 3q | 57706  | 60967  | 3262  | 8p: 104622 - 108356<br>10q: 21671 - 18113<br>6p: 91944 - 95168<br>22q: 19684 - 16443<br>1q: 12559 - 9311<br>18p: 91554 - 95132<br>19q: 16701 - 13461<br>chr2: 114093933 - 114097169<br>4q: 8783 - 6261<br>4p: 14618 - 17140<br>2p: 3251 - 6570 | 97.39<br>93.48<br>92.86<br>97.31<br>92.80<br>94.48<br>97.01<br>97.05<br>93.49<br>93.52<br>91.59 | 94.63 | 0 |
| 216 | 3q | 57730  | 59360  | 1631  | 1p: 281741 - 283465<br>16q: 7077 - 5156<br>21q: 19448 - 18188                                                                                                                                                                                  | 96.81<br>95.38<br>96.13                                                                         | 96.11 | 0 |
| 217 | 3q | 65850  | 73851  | 8002  | 17p: 727 - 18220                                                                                                                                                                                                                               | 96.81                                                                                           | 96.81 | 0 |
| 218 | 3q | 87850  | 99280  | 11431 | 7p: 130045 - 141501                                                                                                                                                                                                                            | 97.89                                                                                           | 97.89 | 0 |
| 219 | 3q | 99386  | 119228 | 19843 | 10p: 10952 - 39687<br>18p: 15346 - 44090<br>chr12: 34168714 - 34210423                                                                                                                                                                         | 95.14<br>95.27<br>91.27                                                                         | 93.89 | 0 |
| 220 | 3q | 100958 | 115912 | 14955 | 1p: 287230 - 301429                                                                                                                                                                                                                            | 94.14                                                                                           | 94.14 | 0 |
| 221 | 3q | 105654 | 118792 | 13139 | chrY: 18047953 - 18076360                                                                                                                                                                                                                      | 91.18                                                                                           | 91.18 | 0 |
| 222 | 3q | 105657 | 106765 | 1109  | chr1: 243986733 - 243996864<br>chrY: 10567257 - 10568441                                                                                                                                                                                       | 90.65<br>93.00                                                                                  | 91.83 | 0 |
| 223 | 3q | 110861 | 119065 | 8205  | 4q: 126874 - 109517<br>chrY: 18929676 - 18942635                                                                                                                                                                                               | 93.92<br>91.05                                                                                  | 92.48 | 0 |
| 224 | 3q | 114461 | 119437 | 4977  | 16q: 138855 - 131467<br>chr12: 36865089 - 36875442                                                                                                                                                                                             | 94.72<br>90.77                                                                                  | 92.75 | 0 |
| 225 | 3q | 117716 | 119438 | 1723  | chr3: 75834770 - 75837024<br>chrY: 10552604 - 10553871                                                                                                                                                                                         | 91.97<br>90.65                                                                                  | 91.31 | 1 |
| 226 | 3q | 124163 | 126679 | 2517  | 10q: 85668 - 83221<br>4q: 78877 - 76430                                                                                                                                                                                                        | 91.20<br>90.87                                                                                  | 91.03 | 0 |
| 227 | 3q | 124173 | 125380 | 1208  | chr3: 75796196 - 75797387                                                                                                                                                                                                                      | 91.68                                                                                           | 91.68 | 1 |
| 228 | 3q | 127585 | 140222 | 12638 | chr5: 84158536 - 84166018                                                                                                                                                                                                                      | 92.06                                                                                           | 92.06 | 0 |
| 229 | 3q | 140414 | 141426 | 1013  | chr5: 84204349 - 84205411                                                                                                                                                                                                                      | 91.68                                                                                           | 91.68 | 0 |
| 230 | 3q | 143348 | 146483 | 3136  | chr5: 84253750 - 84256617                                                                                                                                                                                                                      | 92.22                                                                                           | 92.22 | 0 |
| 231 | 3q | 155105 | 173470 | 18366 | chr8: 43220224 - 43226455                                                                                                                                                                                                                      | 91.37                                                                                           | 91.37 | 0 |
| 232 | 3q | 155996 | 183239 | 27244 | chr21: 14220320 - 14273129                                                                                                                                                                                                                     | 91.67                                                                                           | 91.67 | 0 |
| 233 | 3q | 155996 | 157246 | 1251  | chr18: 14170148 - 14171404                                                                                                                                                                                                                     | 91.3                                                                                            | 91.3  | 0 |
| 234 | 3q | 156747 | 159024 | 2278  | chr9: 33512095 - 33515657<br>chr9: 38601554 - 38605067                                                                                                                                                                                         | 91.47<br>90.48                                                                                  | 90.97 | 0 |
| 235 | 3q | 158691 | 167637 | 8947  | chr9: 92652033 - 92662431                                                                                                                                                                                                                      | 91.47                                                                                           | 91.47 | 0 |
| 236 | 3q | 158691 | 164706 | 6016  | chr9: 97030524 - 97042993                                                                                                                                                                                                                      | 91.02                                                                                           | 91.02 | 0 |
| 237 | 3q | 161678 | 163399 | 1722  | chr9: 38595799 - 38598726<br>chr9: 33518744 - 33521425                                                                                                                                                                                         | 90.77<br>90.84                                                                                  | 90.81 | 0 |
| 238 | 3q | 164741 | 170471 | 5731  | chr9: 38588238 - 38594721<br>chr9: 97025319 - 97030101                                                                                                                                                                                         | 91.44<br>91.89                                                                                  | 91.66 | 0 |
| 239 | 3q | 167479 | 178921 | 11443 | chr9: 33525081 - 33536584                                                                                                                                                                                                                      | 92.62                                                                                           | 92.62 | 0 |
| 240 | 3q | 170746 | 183256 | 12511 | chr9: 97009645 - 97024576                                                                                                                                                                                                                      | 91.26                                                                                           | 91.26 | 0 |
| 241 | 3q | 177510 | 179229 | 1720  | chr9: 38579888 - 38581288                                                                                                                                                                                                                      | 90.7                                                                                            | 90.7  | 0 |
| 242 | 3q | 179254 | 183237 | 3984  | chr13: 18299772 - 18305947<br>chr2: 94893857 - 94900008<br>chr18: 14220855 - 14223626                                                                                                                                                          | 91.94<br>90.79<br>92.65                                                                         | 91.79 | 0 |
| 243 | 3q | 180892 | 183256 | 2365  | chr9: 38573399 - 38575161<br>chr9: 33541649 - 33543410                                                                                                                                                                                         | 91.29<br>91.29                                                                                  | 91.29 | 0 |
| 244 | 3q | 216508 | 252173 | 35666 | chr9: 94333705 - 94366610<br>chr8: 122460261 - 122460556                                                                                                                                                                                       | 91.41<br>92.49                                                                                  | 91.41 | 0 |
| 245 | 3q | 281413 | 284402 | 2990  | chr12: 32898960 - 32899254<br>chr17: 24682666 - 24682959<br>chr16: 12874563 - 12874862<br>chr1: 200536390 - 200536689<br>chr12: 48534873 - 48535173<br>chr9: 71430302 - 71430601<br>chr22: 42677817 - 42678104                                 | 90.00<br>91.51<br>93.52<br>91.51<br>91.04<br>91.52<br>93.22                                     | 91.85 | 0 |
| 246 | 3q | 281435 | 284404 | 2970  | chr16: 67060724 - 67061002                                                                                                                                                                                                                     | 91.56                                                                                           | 91.56 | 0 |
| 247 | 4p | 7699   | 12004  | 4306  | 6q: 147519 - 145651                                                                                                                                                                                                                            | 90.58                                                                                           | 90.58 | 0 |

|     |    |        |        |       |                                                                                                                                                            |                                                             |       |   |
|-----|----|--------|--------|-------|------------------------------------------------------------------------------------------------------------------------------------------------------------|-------------------------------------------------------------|-------|---|
| 248 | 4p | 7699   | 27342  | 19644 | 13q: 10484 - 1375                                                                                                                                          | 91.42                                                       | 91.42 | 0 |
| 249 | 4p | 7714   | 17154  | 9441  | 10q: 21689 - 12304<br>chr2: 114088128 - 114097183<br>19q: 16715 - 7670<br>22q: 19698 - 10660                                                               | 90.67<br>91.96<br>92.12<br>91.96                            | 91.68 | 0 |
| 250 | 4p | 7715   | 14458  | 6744  | 19p: 193578 - 199396<br>6q: 7195 - 1847<br>5q: 13021 - 7682<br>17q: 17506 - 12166<br>21q: 18851 - 12379                                                    | 91.27<br>91.98<br>91.49<br>91.49<br>91.13                   | 91.47 | 0 |
| 251 | 4p | 7723   | 22772  | 15050 | 1q: 15422 - 4691                                                                                                                                           | 92.54                                                       | 92.54 | 0 |
| 252 | 4p | 11125  | 24198  | 13074 | 4q: 13060 - 2763                                                                                                                                           | 98.46                                                       | 98.46 | 1 |
| 253 | 4p | 11143  | 13573  | 2431  | 8p: 120622 - 123046                                                                                                                                        | 91                                                          | 91    | 0 |
| 254 | 4p | 11143  | 27342  | 16200 | 5p: 622 - 13652                                                                                                                                            | 92.52                                                       | 92.52 | 0 |
| 255 | 4p | 11500  | 16821  | 5322  | 16q: 7774 - 1699<br>18p: 88797 - 95146                                                                                                                     | 91.88<br>92.65                                              | 92.27 | 0 |
| 256 | 4p | 14202  | 22772  | 8571  | 6p: 91533 - 98867                                                                                                                                          | 92.79                                                       | 92.79 | 0 |
| 257 | 4p | 14346  | 15689  | 1344  | 1p: 281205 - 283465<br>16q: 104535 - 102639                                                                                                                | 91.78<br>92.95                                              | 92.37 | 0 |
| 258 | 4p | 14618  | 17154  | 2537  | 9q: 25525 - 22275<br>7p: 71847 - 75097<br>8p: 105118 - 108370<br>11p: 111979 - 115229<br>3q: 60982 - 57732<br>19p: 182233 - 185482                         | 93.64<br>93.64<br>91.76<br>93.06<br>92.60<br>93.14          | 92.97 | 0 |
| 259 | 4p | 15154  | 27322  | 12169 | 2p: 3558 - 14710                                                                                                                                           | 91                                                          | 91    | 0 |
| 260 | 4p | 185032 | 188601 | 3570  | chr11: 9553495 - 9560690                                                                                                                                   | 91.54                                                       | 91.54 | 0 |
| 261 | 4p | 191448 | 203036 | 11589 | chr18: 14113043 - 14124512                                                                                                                                 | 91                                                          | 91    | 0 |
| 262 | 4p | 282780 | 294432 | 11653 | chr21: 14317809 - 14326816<br>chr18: 14117071 - 14124599                                                                                                   | 90.80<br>91.06                                              | 90.93 | 0 |
| 263 | 4p | 408846 | 411665 | 2820  | chr17: 64646851 - 64681546                                                                                                                                 | 93.19                                                       | 93.19 | 0 |
| 264 | 4q | 2771   | 13058  | 10288 | 4p: 11123 - 24198<br>5p: 622 - 9438                                                                                                                        | 98.46<br>91.91                                              | 95.19 | 1 |
| 265 | 4q | 2775   | 5760   | 2986  | 5q: 13021 - 10020<br>6q: 7195 - 4191<br>17q: 17506 - 14505<br>8p: 120622 - 123046<br>19p: 196024 - 199396                                                  | 91.26<br>91.79<br>91.26<br>91.36<br>91.44                   | 91.42 | 0 |
| 266 | 4q | 2776   | 7177   | 4402  | 16q: 7077 - 1699<br>21q: 18851 - 14729                                                                                                                     | 91.61<br>90.86                                              | 91.23 | 0 |
| 267 | 4q | 2781   | 36107  | 33327 | 10q: 46814 - 14674                                                                                                                                         | 97.27                                                       | 97.27 | 0 |
| 268 | 4q | 2781   | 11634  | 8854  | 1q: 15422 - 7036                                                                                                                                           | 91.7                                                        | 91.7  | 0 |
| 269 | 4q | 2781   | 8797   | 6017  | 22q: 19698 - 13010<br>19q: 16715 - 10020<br>chr2: 114090478 - 114097183                                                                                    | 91.36<br>92.12<br>91.86                                     | 91.78 | 0 |
| 270 | 4q | 3505   | 15653  | 12149 | 18p: 88797 - 102436                                                                                                                                        | 93.31                                                       | 93.31 | 0 |
| 271 | 4q | 5717   | 7234   | 1518  | 1p: 281205 - 283465                                                                                                                                        | 91.69                                                       | 91.69 | 0 |
| 272 | 4q | 5845   | 11634  | 5790  | 6p: 91533 - 98867                                                                                                                                          | 92.2                                                        | 92.2  | 0 |
| 273 | 4q | 6261   | 8797   | 2537  | 16q: 105889 - 102639<br>7p: 71847 - 75097<br>9q: 25525 - 22275<br>19p: 182233 - 185482<br>3q: 60982 - 57732<br>8p: 105118 - 108370<br>11p: 111979 - 115229 | 93.69<br>93.69<br>93.69<br>93.25<br>92.46<br>91.79<br>93.10 | 93.1  | 0 |
| 274 | 4q | 6797   | 13056  | 6260  | 2p: 3558 - 11886                                                                                                                                           | 90.96                                                       | 90.96 | 0 |
| 275 | 4q | 8663   | 11716  | 3054  | 13q: 6017 - 2102                                                                                                                                           | 92.49                                                       | 92.49 | 0 |
| 276 | 4q | 15442  | 32814  | 17373 | 10q: 46814 - 29390                                                                                                                                         | 98.99                                                       | 98.99 | 0 |
| 277 | 4q | 15442  | 29521  | 14080 | 10q: 46814 - 32700                                                                                                                                         | 98.96                                                       | 98.96 | 0 |
| 278 | 4q | 15442  | 26221  | 10780 | 10q: 46814 - 35999                                                                                                                                         | 99                                                          | 99    | 0 |
| 279 | 4q | 15442  | 22927  | 7486  | 10q: 46814 - 39308                                                                                                                                         | 98.93                                                       | 98.93 | 0 |
| 280 | 4q | 15442  | 19634  | 4193  | 10q: 46814 - 42618                                                                                                                                         | 98.8                                                        | 98.8  | 0 |
| 281 | 4q | 18742  | 39404  | 20663 | 10q: 46814 - 26091                                                                                                                                         | 98.95                                                       | 98.95 | 0 |
| 282 | 4q | 22035  | 39686  | 17652 | 10q: 43786 - 26091                                                                                                                                         | 98.93                                                       | 98.93 | 0 |
| 283 | 4q | 25335  | 39686  | 14352 | 10q: 40476 - 26091                                                                                                                                         | 98.9                                                        | 98.9  | 0 |



|                    |       |        |        |       |                             |       |       |   |
|--------------------|-------|--------|--------|-------|-----------------------------|-------|-------|---|
| 284                | 4q    | 28629  | 39682  | 11054 | 10q: 37163 - 26091          | 98.89 | 98.89 | 0 |
| 285                | 4q    | 31922  | 39686  | 7765  | 10q: 33868 - 26091          | 98.81 | 98.81 | 0 |
| 286                | 4q    | 35215  | 39686  | 4472  | 10q: 30558 - 26091          | 98.61 | 98.61 | 0 |
| 287                | 4q    | 38512  | 39686  | 1175  | 10q: 27259 - 26091          | 98.29 | 98.29 | 0 |
| 288                | 4q    | 39686  | 81906  | 42221 | 10q: 88677 - 46814          | 98.37 | 98.37 | 0 |
| 289                | 4q    | 43533  | 85810  | 42278 | chr3: 75761698 - 75804455   | 95.11 | 95.11 | 0 |
| 290                | 4q    | 82188  | 83378  | 1191  | chrY: 10602384 - 10605587   | 90.00 | 97.04 | 0 |
|                    |       |        |        |       | 10q: 44069 - 43013          | 98.29 |       |   |
|                    |       |        |        |       | 10q: 40759 - 39703          | 98.29 |       |   |
|                    |       |        |        |       | 10q: 37450 - 36394          | 97.86 |       |   |
|                    |       |        |        |       | 10q: 34151 - 33095          | 98.29 |       |   |
|                    |       |        |        |       | 10q: 30841 - 29785          | 98.29 |       |   |
| 10q: 27542 - 26486 | 98.29 |        |        |       |                             |       |       |   |
| 291                | 4q    | 84408  | 89657  | 5250  | chr9: 64132151 - 64135635   | 90.86 | 90.86 | 0 |
| 292                | 4q    | 88909  | 109738 | 20830 | chr3: 75803938 - 75835090   | 92.65 | 92.65 | 0 |
| 293                | 4q    | 100581 | 111447 | 10867 | chr12: 34209036 - 34230448  | 91.45 | 91.45 | 0 |
| 294                | 4q    | 109513 | 126874 | 17362 | 10p: 28824 - 39586          | 93.36 | 93.64 | 0 |
|                    |       |        |        |       | 18p: 33215 - 43990          | 93.53 |       |   |
|                    |       |        |        |       | 9q: 88348 - 77401           | 94.03 |       |   |
| 295                | 4q    | 109513 | 123167 | 13655 | 16q: 138755 - 131398        | 94.73 | 94.73 | 0 |
| 296                | 4q    | 109517 | 111410 | 1894  | chr12: 36865186 - 36867121  | 91.56 | 91.26 | 0 |
|                    |       |        |        |       | 3q: 119338 - 117506         | 90.98 |       |   |
|                    |       |        |        |       | chrY: 10552713 - 10554516   | 91.23 |       |   |
| 297                | 4q    | 121272 | 127030 | 5759  | 1p: 287192 - 293392         | 93.27 | 93.71 | 0 |
|                    |       |        |        |       | 3q: 115912 - 110514         | 94.15 |       |   |
| 298                | 4q    | 125569 | 127186 | 1618  | chr12: 34196193 - 34197802  | 91.18 | 91.18 | 0 |
| 299                | 4q    | 129786 | 203410 | 73625 | chr20: 28193700 - 28254858  | 93.54 | 93.54 | 0 |
| 300                | 4q    | 148465 | 228836 | 80372 | chr9: 66813927 - 66892012   | 93.61 | 93.6  | 0 |
|                    |       |        |        |       | chr9: 67052957 - 67131004   | 93.60 |       |   |
| 301                | 4q    | 389382 | 391241 | 1860  | chr16: 33865962 - 33867849  | 91.03 | 91.03 | 0 |
| 302                | 4q    | 389382 | 391239 | 1858  | chr2: 132840626 - 132842508 | 90.64 | 90.64 | 0 |
| 303                | 5p    | 617    | 4451   | 3835  | 1q: 13870 - 7031            | 94.43 | 94.43 | 0 |
| 304                | 5p    | 617    | 17258  | 16642 | 21q: 21380 - 14724          | 92.48 | 92.48 | 0 |
| 305                | 5p    | 622    | 9438   | 8817  | 4q: 13056 - 2781            | 92.51 | 92.51 | 0 |
| 306                | 5p    | 622    | 13652  | 13031 | 4p: 11143 - 27342           | 92.68 | 92.68 | 0 |
| 307                | 5p    | 683    | 2362   | 1680  | 19p: 196019 - 197721        | 93.86 | 93.63 | 1 |
|                    |       |        |        |       | 10q: 21689 - 14669          | 93.28 |       |   |
|                    |       |        |        |       | chr2: 114090473 - 114097185 | 93.36 |       |   |
|                    |       |        |        |       | 8p: 120617 - 123564         | 95.03 |       |   |
|                    |       |        |        |       | 19q: 16717 - 10015          | 93.63 |       |   |
|                    |       |        |        |       | 22q: 19700 - 13005          | 93.46 |       |   |
|                    |       |        |        |       | 6q: 5868 - 4197             | 94.70 |       |   |
|                    |       |        |        |       | 16q: 3379 - 1705            | 94.00 |       |   |
|                    |       |        |        |       | 5q: 11694 - 10026           | 93.30 |       |   |
|                    |       |        |        |       | 17q: 16179 - 14511          | 93.30 |       |   |
| 18p: 88797 - 95146 | 91.99 |        |        |       |                             |       |       |   |
| 308                | 5p    | 2293   | 8075   | 5783  | 6p: 95055 - 98867           | 93.71 | 93.71 | 0 |
| 309                | 5p    | 2293   | 14897  | 12605 | 13q: 11739 - 2108           | 91.61 | 91.61 | 0 |
| 310                | 5p    | 2293   | 16995  | 14703 | 2p: 6456 - 17928            | 91.78 | 91.78 | 0 |
| 311                | 5p    | 16125  | 27646  | 11522 | chr3: 197230504 - 197244078 | 93.45 | 93.45 | 0 |
| 312                | 5p    | 18771  | 31666  | 12896 | 2p: 155328 - 168181         | 92.29 | 92.29 | 0 |
| 313                | 5p    | 197391 | 246221 | 48831 | chr5: 1620762 - 1652265     | 96.44 | 96.44 | 1 |
| 314                | 5p    | 200769 | 251030 | 50262 | chr3: 196873665 - 196909300 | 93.42 | 93.42 | 0 |
| 315                | 5p    | 200769 | 269778 | 69010 | chr3: 197154630 - 197205838 | 93.59 | 93.59 | 0 |
| 316                | 5p    | 200777 | 211326 | 10550 | chr3: 198834782 - 198843420 | 93.61 | 93.61 | 0 |
| 317                | 5p    | 248964 | 262636 | 13673 | chr5: 1677980 - 1687907     | 95.57 | 94.73 | 1 |
|                    |       |        |        |       | chr3: 198862190 - 198872062 | 93.90 |       |   |
| 318                | 5p    | 262223 | 269778 | 7556  | chr3: 197214129 - 197221816 | 92.49 | 92.49 | 0 |
| 319                | 5p    | 262223 | 281457 | 19235 | 2q: 138714 - 123812         | 92.15 | 92.15 | 0 |
| 320                | 5p    | 263756 | 269778 | 6023  | chr3: 198851711 - 198861497 | 93.82 | 93.82 | 0 |
| 321                | 5p    | 269995 | 281194 | 11200 | chr8: 70399528 - 70407084   | 91.32 | 91.32 | 0 |
| 322                | 5p    | 270537 | 272685 | 2149  | chr3: 73195843 - 73198706   | 94.51 | 94.51 | 0 |
| 323                | 5p    | 270974 | 288231 | 17258 | chr5: 1653358 - 1668818     | 96.43 | 96.43 | 1 |

|     |    |        |        |        |                                                                                                                |                                  |       |   |
|-----|----|--------|--------|--------|----------------------------------------------------------------------------------------------------------------|----------------------------------|-------|---|
| 324 | 5p | 271310 | 273942 | 2633   | chr3: 197211300 - 197214109<br>chr3: 198848840 - 198851194<br>chr3: 197151399 - 197154125                      | 94.26<br>94.66<br>94.13          | 94.35 | 0 |
| 325 | 5p | 274733 | 278314 | 3582   | chr3: 196868822 - 196872795<br>chr3: 198844298 - 198848270                                                     | 93.39<br>93.82                   | 93.6  | 0 |
| 326 | 5p | 275691 | 278314 | 2624   | chr3: 197206715 - 197208720                                                                                    | 93.8                             | 93.8  | 0 |
| 327 | 5q | 1037   | 2646   | 1610   | 6q: 141080 - 139446                                                                                            | 91.83                            | 91.83 | 0 |
| 328 | 5q | 1038   | 12824  | 11787  | 19p: 189683 - 199081<br>chr2: 114079703 - 114093488<br>8p: 112649 - 123045                                     | 95.90<br>95.72<br>94.91          | 95.51 | 0 |
| 329 | 5q | 2247   | 41588  | 39342  | 17q: 43948 - 4319                                                                                              | 98.67                            | 98.67 | 0 |
| 330 | 5q | 2247   | 13019  | 10773  | 22q: 16000 - 3342<br>10q: 17677 - 5039<br>21q: 17747 - 5548<br>19q: 13018 - 639                                | 95.43<br>96.09<br>95.52<br>95.89 | 95.73 | 0 |
| 331 | 5q | 5746   | 11967  | 6222   | 1q: 8975 - 1764                                                                                                | 95.66                            | 95.66 | 0 |
| 332 | 5q | 5746   | 7808   | 2063   | chr3: 75756447 - 75760281                                                                                      | 93.52                            | 93.52 | 0 |
| 333 | 5q | 5836   | 137863 | 132028 | 6q: 133270 - 1                                                                                                 | 98.57                            | 98.57 | 0 |
| 334 | 5q | 7682   | 13021  | 5340   | 4p: 7719 - 14175                                                                                               | 92.28                            | 92.28 | 0 |
| 335 | 5q | 10026  | 15432  | 5407   | 16q: 13032 - 1705                                                                                              | 96.76                            | 96.76 | 0 |
| 336 | 5q | 10026  | 11694  | 1669   | 5p: 618 - 2291                                                                                                 | 94.7                             | 94.7  | 1 |
| 337 | 5q | 10390  | 13021  | 2632   | 4q: 5818 - 2781<br>18p: 88797 - 91117                                                                          | 92.10<br>93.44                   | 92.77 | 0 |
| 338 | 5q | 15084  | 130366 | 115283 | 1p: 1 - 120046                                                                                                 | 98.83                            | 98.83 | 0 |
| 339 | 5q | 42421  | 72329  | 29909  | chrY: 24800028 - 24831337<br>chrY: 25807359 - 25838662                                                         | 96.88<br>96.88                   | 96.88 | 0 |
| 340 | 5q | 42421  | 68260  | 25840  | chr4: 119695468 - 119722680                                                                                    | 97.48                            | 97.48 | 0 |
| 341 | 5q | 42421  | 45418  | 2998   | chr1: 239479432 - 239482412                                                                                    | 97.35                            | 97.35 | 0 |
| 342 | 5q | 42464  | 144676 | 102213 | 8p: 1 - 103892                                                                                                 | 98.77                            | 98.77 | 0 |
| 343 | 5q | 44054  | 45418  | 1365   | chr1: 220383273 - 220384637                                                                                    | 98.14                            | 98.14 | 0 |
| 344 | 5q | 46443  | 72329  | 25887  | chr1: 220385665 - 220412991<br>chr1: 239483436 - 239510646                                                     | 97.40<br>97.56                   | 97.48 | 0 |
| 345 | 5q | 62109  | 72329  | 10221  | 16q: 23961 - 13817                                                                                             | 97.62                            | 97.62 | 0 |
| 346 | 5q | 64090  | 72329  | 8240   | 2q: 8258 - 107                                                                                                 | 97.67                            | 97.67 | 0 |
| 347 | 5q | 68264  | 72329  | 4066   | chr4: 119944731 - 119948842                                                                                    | 97.98                            | 97.98 | 0 |
| 348 | 5q | 80102  | 189359 | 109258 | 19p: 68278 - 176313                                                                                            | 98.47                            | 98.47 | 0 |
| 349 | 5q | 80102  | 156343 | 76242  | 6p: 16681 - 87323                                                                                              | 98.08                            | 98.08 | 0 |
| 350 | 5q | 80764  | 122536 | 41773  | 15q: 116787 - 75307                                                                                            | 98.04                            | 98.04 | 0 |
| 351 | 5q | 81451  | 189359 | 107909 | 11p: 1 - 106130                                                                                                | 98.43                            | 98.43 | 0 |
| 352 | 5q | 126263 | 156996 | 30734  | 20q: 46222 - 21028<br>chr1: 239518848 - 239549617<br>chr10: 38769816 - 38800933<br>chr4: 119904873 - 119936314 | 97.56<br>97.15<br>96.55<br>96.88 | 97.03 | 0 |
| 353 | 5q | 126264 | 151484 | 25221  | chrY: 24760333 - 24791629<br>chrY: 25847059 - 25878360                                                         | 96.08<br>95.99                   | 96.03 | 0 |
| 354 | 5q | 126535 | 189359 | 62825  | 7p: 2359 - 66000<br>16q: 96795 - 32910                                                                         | 98.45<br>98.42                   | 98.44 | 0 |
| 355 | 5q | 126807 | 146656 | 19850  | 2q: 37420 - 17207                                                                                              | 97.3                             | 97.3  | 0 |
| 356 | 5q | 126807 | 140872 | 14066  | chr4: 165542477 - 165556462                                                                                    | 95.78                            | 95.78 | 0 |
| 357 | 5q | 126807 | 130366 | 3560   | chr1: 220421937 - 220425497                                                                                    | 97.59                            | 97.59 | 0 |
| 358 | 5q | 130510 | 150281 | 19772  | chr1: 220425641 - 220445916                                                                                    | 97.24                            | 97.24 | 0 |
| 359 | 5q | 130510 | 131688 | 1179   | 1p: 120190 - 121369                                                                                            | 98.33                            | 98.33 | 0 |
| 360 | 5q | 135265 | 158314 | 23050  | 1p: 124946 - 147924                                                                                            | 98.87                            | 98.87 | 0 |
| 361 | 5q | 136460 | 138396 | 1937   | chr1: 224457838 - 224459772                                                                                    | 97.25                            | 97.25 | 0 |
| 362 | 5q | 137159 | 189359 | 52201  | 3q: 51879 - 1                                                                                                  | 98.61                            | 98.61 | 0 |
| 363 | 5q | 138750 | 151484 | 12735  | chr1: 224467506 - 224480262                                                                                    | 96.84                            | 96.84 | 0 |
| 364 | 5q | 142300 | 151187 | 8888   | chr7: 55985248 - 55994150                                                                                      | 94.68                            | 94.68 | 0 |
| 365 | 5q | 142303 | 144322 | 2020   | chr7: 61805021 - 61806472<br>chr1: 193837523 - 193839718<br>chr7: 55420846 - 55423188                          | 92.28<br>92.72<br>92.77          | 92.59 | 0 |
| 366 | 5q | 142323 | 149040 | 6718   | chr7: 45414266 - 45420987                                                                                      | 95.29                            | 95.29 | 0 |
| 367 | 5q | 146288 | 157214 | 10927  | chr7: 127667226 - 127677946                                                                                    | 96.59                            | 96.59 | 0 |

|     |    |        |        |       |                                                                                                                                                                              |                                                    |       |   |
|-----|----|--------|--------|-------|------------------------------------------------------------------------------------------------------------------------------------------------------------------------------|----------------------------------------------------|-------|---|
| 368 | 5q | 146307 | 149040 | 2734  | chr7: 51009103 - 51011866<br>chr7: 39393644 - 39396387<br>chr7: 62457999 - 62460749<br>chr7: 55363599 - 55366358<br>chr7: 56432157 - 56434907<br>chr1: 219029846 - 219032485 | 93.00<br>93.00<br>94.00<br>94.00<br>94.00<br>97.00 | 94.17 | 0 |
| 369 | 5q | 147611 | 157214 | 9604  | chr4: 120680507 - 120690578                                                                                                                                                  | 95.28                                              | 95.28 | 0 |
| 370 | 5q | 149130 | 157214 | 8085  | chr7: 45402369 - 45414176                                                                                                                                                    | 94.95                                              | 94.95 | 0 |
| 371 | 5q | 149130 | 150883 | 1754  | chr7: 56434997 - 56436149<br>chr1: 219032574 - 219033728<br>chr7: 62455575 - 62457909<br>chr7: 55366448 - 55368463<br>chr7: 39391514 - 39393554<br>chr7: 51011956 - 51014002 | 94.56<br>96.98<br>94.37<br>94.85<br>95.26<br>94.72 | 95.12 | 0 |
| 372 | 5q | 151189 | 155937 | 4749  | chr1: 224460233 - 224466670                                                                                                                                                  | 94.41                                              | 94.41 | 0 |
| 373 | 5q | 154639 | 162158 | 7520  | 1p: 151063 - 158591                                                                                                                                                          | 98.78                                              | 98.78 | 0 |
| 374 | 5q | 154639 | 158314 | 3676  | 1p: 147657 - 151331                                                                                                                                                          | 98.91                                              | 98.91 | 0 |
| 375 | 5q | 154642 | 155937 | 1296  | chr7: 51020104 - 51021398                                                                                                                                                    | 95.32                                              | 95.32 | 0 |
| 376 | 5q | 154643 | 157207 | 2565  | chr7: 55375429 - 55378281<br>chr7: 39386619 - 39389187<br>chr7: 56005902 - 56008476<br>chr1: 219039323 - 219041899<br>chr1: 220447184 - 220449711                            | 96.40<br>95.18<br>96.06<br>95.95<br>97.75          | 96.27 | 0 |
| 377 | 5q | 158046 | 189359 | 31314 | chr1: 219039323 - 219078541<br>chr1: 239547046 - 239583712<br>chr4: 120688005 - 120724640                                                                                    | 97.44<br>97.40<br>96.70                            | 97.18 | 0 |
| 378 | 5q | 158046 | 174974 | 16929 | chr7: 56005902 - 56027313                                                                                                                                                    | 93.1                                               | 93.1  | 0 |
| 379 | 5q | 158093 | 160801 | 2709  | chr7: 55375429 - 55383906<br>chr7: 56015725 - 56026447                                                                                                                       | 93.85<br>90.67                                     | 92.26 | 0 |
| 380 | 5q | 160422 | 189359 | 28938 | chr10: 38735562 - 38764372<br>chr4: 119876270 - 119899413                                                                                                                    | 97.16<br>97.58                                     | 97.37 | 0 |
| 381 | 5q | 160425 | 186904 | 26480 | chr1: 220455168 - 220481396                                                                                                                                                  | 97.8                                               | 97.8  | 0 |
| 382 | 5q | 160425 | 182182 | 21758 | chr7: 39360178 - 39381110                                                                                                                                                    | 92.94                                              | 92.94 | 0 |
| 383 | 5q | 160425 | 177040 | 16616 | chr7: 127645453 - 127661758                                                                                                                                                  | 95.78                                              | 95.78 | 0 |
| 384 | 5q | 160449 | 164697 | 4249  | chr7: 45392682 - 45396890                                                                                                                                                    | 96.05                                              | 96.05 | 0 |
| 385 | 5q | 161794 | 167842 | 6049  | chr11: 49997861 - 50003428<br>chr7: 62412186 - 62417768<br>chr7: 56475714 - 56481294<br>chr7: 51029490 - 51036010                                                            | 90.62<br>91.30<br>91.30<br>93.07                   | 91.57 | 0 |
| 386 | 5q | 161924 | 164697 | 2774  | chr7: 55385504 - 55388239                                                                                                                                                    | 94.24                                              | 94.24 | 0 |
| 387 | 5q | 164445 | 189359 | 24915 | 1p: 160844 - 185365                                                                                                                                                          | 98.35                                              | 98.35 | 0 |
| 388 | 5q | 164445 | 174106 | 9662  | chr7: 65587537 - 65593232                                                                                                                                                    | 91.45                                              | 91.45 | 0 |
| 389 | 5q | 164445 | 167654 | 3210  | chr7: 64516409 - 64519292                                                                                                                                                    | 91.91                                              | 91.91 | 0 |
| 390 | 5q | 168268 | 173807 | 5540  | chr7: 64511343 - 64515807                                                                                                                                                    | 90.86                                              | 90.86 | 0 |
| 391 | 5q | 173730 | 189359 | 15630 | 9q: 16434 - 834<br>chr7: 45374387 - 45389874                                                                                                                                 | 98.07<br>96.33                                     | 97.2  | 0 |
| 392 | 5q | 176293 | 177779 | 1487  | chr7: 64507178 - 64508843                                                                                                                                                    | 92.29                                              | 92.29 | 0 |
| 393 | 5q | 176777 | 182238 | 5462  | chr7: 56029594 - 56035175                                                                                                                                                    | 92.96                                              | 92.96 | 0 |
| 394 | 5q | 183119 | 184248 | 1130  | chr7: 56036051 - 56037182                                                                                                                                                    | 92.84                                              | 92.84 | 0 |
| 395 | 5q | 184209 | 189359 | 5151  | chr7: 127639839 - 127644996                                                                                                                                                  | 95.62                                              | 95.62 | 0 |
| 396 | 5q | 186770 | 188256 | 1487  | chr7: 75222310 - 75223815<br>chr7: 65540948 - 65542445                                                                                                                       | 93.75<br>93.81                                     | 93.78 | 0 |
| 397 | 5q | 189665 | 204814 | 15150 | chr9: 43466349 - 43481354                                                                                                                                                    | 94.32                                              | 94.32 | 0 |
| 398 | 5q | 189665 | 195466 | 5802  | chr21: 13660344 - 13666335<br>chr18: 14857139 - 14863027                                                                                                                     | 94.28<br>94.32                                     | 94.3  | 0 |
| 399 | 5q | 191429 | 192460 | 1032  | chr5: 177462676 - 177463723                                                                                                                                                  | 90.73                                              | 90.73 | 1 |
| 400 | 5q | 195065 | 204816 | 9752  | chr21: 10119664 - 10128801                                                                                                                                                   | 94.13                                              | 94.13 | 0 |
| 401 | 5q | 239082 | 240163 | 1082  | chr5: 108147435 - 108147689                                                                                                                                                  | 91.33                                              | 91.33 | 1 |
| 402 | 5q | 361545 | 363994 | 2450  | chr13: 100054189 - 100087959                                                                                                                                                 | 93.16                                              | 93.16 | 0 |
| 403 | 5q | 473470 | 474634 | 1165  | chr5: 180306440 - 180307608                                                                                                                                                  | 98                                                 | 98    | 1 |
| 404 | 5q | 490760 | 495945 | 5186  | chr15: 50626603 - 50636713                                                                                                                                                   | 92.68                                              | 92.68 | 0 |
| 405 | 5q | 491008 | 494245 | 3238  | chr2: 31492818 - 31496144                                                                                                                                                    | 91.05                                              | 91.05 | 0 |
| 406 | 5q | 494980 | 496001 | 1022  | chr2: 100583153 - 100584172                                                                                                                                                  | 91                                                 | 91    | 0 |
| 407 | 6p | 1      | 58402  | 58402 | 15q: 116787 - 59048                                                                                                                                                          | 98.13                                              | 98.13 | 0 |
| 408 | 6p | 1      | 87328  | 87328 | 19p: 51596 - 143803                                                                                                                                                          | 98.2                                               | 98.2  | 0 |

|     |    |       |        |       |                                                                                                                                                                                                                                                        |                                                                                                 |       |   |
|-----|----|-------|--------|-------|--------------------------------------------------------------------------------------------------------------------------------------------------------------------------------------------------------------------------------------------------------|-------------------------------------------------------------------------------------------------|-------|---|
| 409 | 6p | 16681 | 66233  | 49553 | 1p: 70481 - 120046                                                                                                                                                                                                                                     | 98.56                                                                                           | 98.56 | 0 |
| 410 | 6p | 16681 | 80537  | 63857 | 8p: 37604 - 103892                                                                                                                                                                                                                                     | 98.12                                                                                           | 98.12 | 0 |
| 411 | 6p | 17348 | 91429  | 74082 | 6q: 139658 - 72955                                                                                                                                                                                                                                     | 98.47                                                                                           | 98.47 | 1 |
| 412 | 6p | 17691 | 87325  | 69635 | 5q: 156343 - 80764<br>11p: 1 - 73516                                                                                                                                                                                                                   | 98.19<br>98.37                                                                                  | 98.28 | 0 |
| 413 | 6p | 62132 | 91398  | 29267 | 20q: 50954 - 21027                                                                                                                                                                                                                                     | 98.1                                                                                            | 98.1  | 0 |
| 414 | 6p | 62134 | 86141  | 24008 | chrY: 24761547 - 24791629<br>chrY: 25847059 - 25877147                                                                                                                                                                                                 | 95.68<br>95.68                                                                                  | 95.68 | 0 |
| 415 | 6p | 62241 | 87327  | 25087 | chr1: 239518847 - 239548748<br>chr10: 38770686 - 38800933<br>7p: 2359 - 33495<br>chr4: 119905733 - 119936314<br>16q: 64320 - 32910                                                                                                                     | 97.44<br>96.38<br>97.68<br>96.78<br>97.59                                                       | 97.17 | 0 |
| 416 | 6p | 62675 | 66233  | 3559  | chr1: 220421937 - 220425497                                                                                                                                                                                                                            | 97.56                                                                                           | 97.56 | 0 |
| 417 | 6p | 62675 | 77184  | 14510 | chr4: 165542477 - 165556919                                                                                                                                                                                                                            | 95.14                                                                                           | 95.14 | 0 |
| 418 | 6p | 62675 | 82522  | 19848 | 2q: 37420 - 17207                                                                                                                                                                                                                                      | 97.03                                                                                           | 97.03 | 0 |
| 419 | 6p | 66377 | 67555  | 1179  | 1p: 120190 - 121369                                                                                                                                                                                                                                    | 95.96                                                                                           | 95.96 | 0 |
| 420 | 6p | 66377 | 76979  | 10603 | chr1: 220425641 - 220436743                                                                                                                                                                                                                            | 96.65                                                                                           | 96.65 | 0 |
| 421 | 6p | 71131 | 76979  | 5849  | 1p: 124946 - 130821                                                                                                                                                                                                                                    | 97.35                                                                                           | 97.35 | 0 |
| 422 | 6p | 72297 | 74224  | 1928  | chr1: 224457849 - 224459772                                                                                                                                                                                                                            | 97.34                                                                                           | 97.34 | 0 |
| 423 | 6p | 72998 | 87328  | 14331 | 3q: 19226 - 1                                                                                                                                                                                                                                          | 98.04                                                                                           | 98.04 | 0 |
| 424 | 6p | 74610 | 86919  | 12310 | chr1: 224460233 - 224480262                                                                                                                                                                                                                            | 96.9                                                                                            | 96.9  | 0 |
| 425 | 6p | 78151 | 80082  | 1932  | chr1: 193837523 - 193838976<br>chr7: 61805021 - 61807375                                                                                                                                                                                               | 93.19<br>92.00                                                                                  | 92.59 | 0 |
| 426 | 6p | 78151 | 87325  | 9175  | chr1: 220437912 - 220448841<br>chr7: 55985248 - 56007603<br>1p: 131997 - 145957                                                                                                                                                                        | 97.50<br>95.73<br>97.95                                                                         | 97.06 | 0 |
| 427 | 6p | 78174 | 84906  | 6733  | chr7: 45414266 - 45420987                                                                                                                                                                                                                              | 95.66                                                                                           | 95.66 | 0 |
| 428 | 6p | 79475 | 83045  | 3571  | chr7: 55422123 - 55425758                                                                                                                                                                                                                              | 91.58                                                                                           | 91.58 | 0 |
| 429 | 6p | 82154 | 87323  | 5170  | chr7: 127668095 - 127677946                                                                                                                                                                                                                            | 96.56                                                                                           | 96.56 | 0 |
| 430 | 6p | 82173 | 84906  | 2734  | chr7: 51009103 - 51011866<br>chr7: 39393644 - 39396387<br>chr7: 62457999 - 62460749<br>chr7: 55363599 - 55366358<br>chr7: 56432157 - 56434907<br>chr1: 219029845 - 219032485                                                                           | 93.00<br>93.24<br>94.00<br>94.00<br>95.00<br>97.00                                              | 94.37 | 0 |
| 431 | 6p | 83477 | 87328  | 3852  | chr4: 120680507 - 120689715                                                                                                                                                                                                                            | 95.09                                                                                           | 95.09 | 0 |
| 432 | 6p | 84996 | 86400  | 1405  | chr7: 62456760 - 62457909<br>chr7: 56434997 - 56436148<br>chr7: 51011956 - 51021398                                                                                                                                                                    | 94.14<br>94.29<br>94.51                                                                         | 94.31 | 0 |
| 433 | 6p | 84996 | 87324  | 2329  | chr7: 39387491 - 39393554<br>chr7: 55366448 - 55377459<br>chr7: 45403235 - 45414176<br>chr1: 219032574 - 219041033                                                                                                                                     | 95.63<br>95.17<br>95.47<br>96.80                                                                | 95.77 | 0 |
| 434 | 6p | 91477 | 93644  | 2168  | 21q: 19448 - 4338<br>10q: 20030 - 3829<br>1p: 281333 - 283465<br>16q: 104531 - 102637                                                                                                                                                                  | 93.37<br>91.83<br>92.33<br>93.28                                                                | 92.7  | 0 |
| 435 | 6p | 91611 | 105620 | 14010 | 1q: 28891 - 8975                                                                                                                                                                                                                                       | 93.62                                                                                           | 93.62 | 0 |
| 436 | 6p | 91699 | 94972  | 3274  | chr2: 114079703 - 114096772<br>22q: 19698 - 2133<br>16q: 7769 - 4748<br>18p: 91144 - 94731<br>19q: 16715 - 13047<br>19p: 182231 - 185064<br>3q: 60982 - 57730<br>11p: 111977 - 115229<br>9q: 25525 - 22273<br>7p: 71845 - 75097<br>8p: 105117 - 107957 | 93.13<br>92.90<br>93.36<br>92.27<br>92.91<br>92.76<br>92.88<br>92.88<br>92.79<br>92.79<br>92.73 | 92.85 | 0 |
| 437 | 6p | 91746 | 98867  | 7122  | 4q: 11634 - 5845<br>4p: 14202 - 22772<br>2p: 3251 - 10453                                                                                                                                                                                              | 92.55<br>93.20<br>91.39                                                                         | 92.38 | 0 |
|     |    |       |        |       | 5p: 2293 - 8075                                                                                                                                                                                                                                        |                                                                                                 |       |   |

|     |    |        |        |        |                                                                                                                                                                                                                                                                                 |                                                                                        |       |   |
|-----|----|--------|--------|--------|---------------------------------------------------------------------------------------------------------------------------------------------------------------------------------------------------------------------------------------------------------------------------------|----------------------------------------------------------------------------------------|-------|---|
| 439 | 6p | 114644 | 116863 | 2220   | chr16: 32541387 - 32543099                                                                                                                                                                                                                                                      | 92                                                                                     | 92    | 0 |
| 440 | 6q | 1      | 133275 | 133275 | 5q: 137868 - 5836                                                                                                                                                                                                                                                               | 98.63                                                                                  | 98.63 | 0 |
| 441 | 6q | 1      | 33611  | 33611  | 17q: 43948 - 8545                                                                                                                                                                                                                                                               | 98.2                                                                                   | 98.2  | 0 |
| 442 | 6q | 1      | 7193   | 7193   | 10q: 17677 - 8719<br>21q: 17747 - 8764<br>22q: 16000 - 7022<br>chr2: 114084500 - 114093488<br>19q: 13018 - 4044                                                                                                                                                                 | 94.99<br>94.73<br>94.55<br>94.53<br>95.02                                              | 94.76 | 0 |
| 443 | 6q | 1      | 6375   | 6375   | 1q: 8975 - 1854<br>8p: 116423 - 123045                                                                                                                                                                                                                                          | 95.00<br>94.70                                                                         | 94.85 | 0 |
| 444 | 6q | 1      | 1973   | 1973   | chr3: 75756534 - 75760281                                                                                                                                                                                                                                                       | 94.4                                                                                   | 94.4  | 0 |
| 445 | 6q | 1847   | 7194   | 5348   | 19p: 193598 - 199081<br>4p: 7719 - 14175                                                                                                                                                                                                                                        | 94.03<br>92.79                                                                         | 93.41 | 0 |
| 446 | 6q | 4191   | 9611   | 5421   | 16q: 13032 - 1699                                                                                                                                                                                                                                                               | 96.87                                                                                  | 96.87 | 0 |
| 447 | 6q | 4191   | 5868   | 1678   | 5p: 612 - 2291                                                                                                                                                                                                                                                                  | 94.7                                                                                   | 94.7  | 0 |
| 448 | 6q | 4559   | 7195   | 2637   | 4q: 5818 - 2771<br>18p: 88797 - 91117                                                                                                                                                                                                                                           | 92.20<br>93.29                                                                         | 92.75 | 0 |
| 449 | 6q | 9260   | 128333 | 119074 | 1p: 1 - 122607                                                                                                                                                                                                                                                                  | 98.74                                                                                  | 98.74 | 0 |
| 450 | 6q | 34546  | 64494  | 29949  | chrY: 25807359 - 25838662<br>chrY: 24800028 - 24831337                                                                                                                                                                                                                          | 96.93<br>96.93                                                                         | 96.93 | 0 |
| 451 | 6q | 34546  | 60422  | 25877  | chr4: 119695468 - 119722680                                                                                                                                                                                                                                                     | 97.52                                                                                  | 97.52 | 0 |
| 452 | 6q | 34546  | 37542  | 2997   | chr1: 239479432 - 239482412                                                                                                                                                                                                                                                     | 98.08                                                                                  | 98.08 | 0 |
| 453 | 6q | 34589  | 139657 | 105069 | 8p: 1 - 112857                                                                                                                                                                                                                                                                  | 98.55                                                                                  | 98.55 | 0 |
| 454 | 6q | 36178  | 37542  | 1365   | chr1: 220383273 - 220384637                                                                                                                                                                                                                                                     | 98.14                                                                                  | 98.14 | 0 |
| 455 | 6q | 38563  | 64494  | 25932  | chr1: 220385665 - 220412991<br>chr1: 239483436 - 239510646                                                                                                                                                                                                                      | 97.50<br>97.47                                                                         | 97.48 | 0 |
| 456 | 6q | 54277  | 64494  | 10218  | 16q: 23961 - 13817                                                                                                                                                                                                                                                              | 97.62                                                                                  | 97.62 | 0 |
| 457 | 6q | 56258  | 64494  | 8237   | 2q: 8258 - 107                                                                                                                                                                                                                                                                  | 97.67                                                                                  | 97.67 | 0 |
| 458 | 6q | 60426  | 64494  | 4069   | chr4: 119944731 - 119948842                                                                                                                                                                                                                                                     | 97.98                                                                                  | 97.98 | 0 |
| 459 | 6q | 72288  | 139658 | 67371  | 6p: 16681 - 91429                                                                                                                                                                                                                                                               | 98.51                                                                                  | 98.51 | 1 |
| 460 | 6q | 72288  | 133275 | 60988  | 19p: 68278 - 124700                                                                                                                                                                                                                                                             | 98.48                                                                                  | 98.48 | 0 |
| 461 | 6q | 72955  | 117939 | 44985  | 15q: 116787 - 75307                                                                                                                                                                                                                                                             | 98.12                                                                                  | 98.12 | 0 |
| 462 | 6q | 73642  | 133275 | 59634  | 11p: 1 - 54766                                                                                                                                                                                                                                                                  | 98.61                                                                                  | 98.61 | 0 |
| 463 | 6q | 121665 | 139627 | 17963  | 20q: 50954 - 21029                                                                                                                                                                                                                                                              | 97.27                                                                                  | 97.27 | 0 |
| 464 | 6q | 121883 | 133274 | 11392  | chr1: 239518849 - 239530560<br>chr10: 38789362 - 38800932<br>chr4: 119924755 - 119936314<br>chrY: 25847059 - 25864666<br>chrY: 24774026 - 24791629<br>7p: 2360 - 13964<br>16q: 43956 - 32910<br>chr4: 165542477 - 165553415<br>chr1: 220421937 - 220433466<br>2q: 28270 - 17207 | 97.48<br>97.04<br>96.69<br>96.56<br>96.56<br>98.08<br>98.20<br>95.86<br>97.69<br>97.62 | 97.18 | 0 |
| 465 | 6q | 130668 | 133267 | 2600   | 1p: 124946 - 127509                                                                                                                                                                                                                                                             | 96.97                                                                                  | 96.97 | 0 |
| 466 | 6q | 131862 | 133275 | 1414   | chr1: 224458366 - 224459772                                                                                                                                                                                                                                                     | 97.14                                                                                  | 97.14 | 0 |
| 467 | 6q | 133279 | 137789 | 4511   | 8p: 130338 - 135407                                                                                                                                                                                                                                                             | 97.54                                                                                  | 97.54 | 0 |
| 468 | 6q | 133279 | 134337 | 1059   | 1p: 241682 - 242735                                                                                                                                                                                                                                                             | 98.36                                                                                  | 98.36 | 0 |
| 469 | 6q | 139446 | 146861 | 7416   | 10q: 14856 - 3829<br>22q: 13192 - 2133                                                                                                                                                                                                                                          | 92.36<br>91.57                                                                         | 91.97 | 0 |
| 470 | 6q | 139446 | 145792 | 6347   | 5q: 7797 - 1037<br>17q: 12289 - 3110<br>21q: 12502 - 4338<br>19p: 189683 - 193721                                                                                                                                                                                               | 92.54<br>94.37<br>92.50<br>92.12                                                       | 92.88 | 0 |
| 471 | 6q | 139446 | 141080 | 1635   | chr2: 114079703 - 114081312                                                                                                                                                                                                                                                     | 91.68                                                                                  | 91.68 | 0 |
| 472 | 6q | 140681 | 145794 | 5114   | 19q: 7793 - 639                                                                                                                                                                                                                                                                 | 91.94                                                                                  | 91.94 | 0 |
| 473 | 6q | 162238 | 164340 | 2103   | chr12: 106789730 - 106791527                                                                                                                                                                                                                                                    | 93.03                                                                                  | 93.03 | 0 |
| 474 | 6q | 162241 | 168430 | 6190   | chr9: 113688734 - 113689483                                                                                                                                                                                                                                                     | 92.62                                                                                  | 92.62 | 0 |
| 475 | 7p | 1      | 17376  | 17376  | chr4: 165539585 - 165556842                                                                                                                                                                                                                                                     | 95.92                                                                                  | 95.92 | 0 |
| 476 | 7p | 11     | 27604  | 27594  | chrY: 24760333 - 24793975<br>chrY: 25844723 - 25878360                                                                                                                                                                                                                          | 96.10<br>96.10                                                                         | 96.1  | 0 |
| 477 | 7p | 91     | 1188   | 1098   | chr1: 220419136 - 220420213                                                                                                                                                                                                                                                     | 98.15                                                                                  | 98.15 | 0 |
| 478 | 7p | 91     | 22770  | 22680  | 2q: 37420 - 14408                                                                                                                                                                                                                                                               | 97.49                                                                                  | 97.49 | 0 |
| 479 | 7p | 91     | 73743  | 73653  | 16q: 104535 - 30092                                                                                                                                                                                                                                                             | 98.74                                                                                  | 98.74 | 0 |

|     |    |       |        |       |                                                                                                                                                                              |                                                    |       |   |
|-----|----|-------|--------|-------|------------------------------------------------------------------------------------------------------------------------------------------------------------------------------|----------------------------------------------------|-------|---|
| 480 | 7p | 223   | 34149  | 33927 | 20q: 46227 - 18783<br>chr4: 119904873 - 119938569<br>chr10: 38769816 - 38803195<br>chr1: 239517108 - 239549617                                                               | 97.45<br>96.50<br>96.67<br>97.02                   | 96.91 | 0 |
| 481 | 7p | 2359  | 33495  | 31137 | 6p: 62133 - 87328                                                                                                                                                            | 97.77                                              | 97.77 | 0 |
| 482 | 7p | 2359  | 66000  | 63642 | 5q: 189359 - 126263                                                                                                                                                          | 98.41                                              | 98.41 | 0 |
| 483 | 7p | 2360  | 4799   | 2440  | 1p: 115941 - 118380                                                                                                                                                          | 97.3                                               | 97.3  | 0 |
| 484 | 7p | 2360  | 13959  | 11600 | 6q: 133270 - 121665                                                                                                                                                          | 98.23                                              | 98.23 | 0 |
| 485 | 7p | 2360  | 20796  | 18437 | 8p: 85490 - 103892                                                                                                                                                           | 98.21                                              | 98.21 | 0 |
| 486 | 7p | 2360  | 75076  | 72717 | 19p: 112806 - 185461                                                                                                                                                         | 98.45                                              | 98.45 | 0 |
| 487 | 7p | 2360  | 89945  | 87586 | 11p: 43183 - 128459                                                                                                                                                          | 98.61                                              | 98.61 | 0 |
| 488 | 7p | 2905  | 6467   | 3563  | chr1: 220421937 - 220425497                                                                                                                                                  | 98.09                                              | 98.09 | 0 |
| 489 | 7p | 4882  | 6467   | 1586  | 1p: 118463 - 120046                                                                                                                                                          | 99.15                                              | 99.15 | 0 |
| 490 | 7p | 6611  | 9026   | 2416  | 1p: 120190 - 122607                                                                                                                                                          | 98.33                                              | 98.33 | 0 |
| 491 | 7p | 6611  | 26401  | 19791 | chr1: 220425641 - 220445916                                                                                                                                                  | 97.27                                              | 97.27 | 0 |
| 492 | 7p | 11360 | 35468  | 24109 | 1p: 124946 - 147924                                                                                                                                                          | 98.35                                              | 98.35 | 0 |
| 493 | 7p | 12555 | 14503  | 1949  | chr1: 224457827 - 224459772                                                                                                                                                  | 97.82                                              | 97.82 | 0 |
| 494 | 7p | 13255 | 102116 | 88862 | 3q: 87850 - 1                                                                                                                                                                | 98.44                                              | 98.44 | 0 |
| 495 | 7p | 14848 | 27604  | 12757 | chr1: 224467506 - 224480262                                                                                                                                                  | 96.38                                              | 96.38 | 0 |
| 496 | 7p | 18424 | 27307  | 8884  | chr7: 55985248 - 55994150                                                                                                                                                    | 94.61                                              | 94.61 | 1 |
| 497 | 7p | 18427 | 20413  | 1987  | chr7: 61805021 - 61806480<br>chr1: 193837523 - 193839718<br>chr7: 55420846 - 55423090                                                                                        | 92.11<br>92.86<br>92.63                            | 92.53 | 1 |
| 498 | 7p | 18447 | 25154  | 6708  | chr7: 45414266 - 45420987                                                                                                                                                    | 94.63                                              | 94.63 | 1 |
| 499 | 7p | 22443 | 25154  | 2712  | chr7: 56432166 - 56434907<br>chr7: 62457999 - 62460740<br>chr7: 51009141 - 51011866<br>chr7: 39393644 - 39396354<br>chr7: 55363641 - 55366358<br>chr1: 219029846 - 219032485 | 94.00<br>94.00<br>93.00<br>93.76<br>94.00<br>97.00 | 94.29 | 1 |
| 500 | 7p | 22444 | 34368  | 11925 | chr7: 127667226 - 127677904                                                                                                                                                  | 96.27                                              | 96.27 | 1 |
| 501 | 7p | 23725 | 34368  | 10644 | chr4: 120680507 - 120690578                                                                                                                                                  | 94.44                                              | 94.44 | 0 |
| 502 | 7p | 25244 | 34368  | 9125  | chr7: 45402369 - 45414176                                                                                                                                                    | 94.38                                              | 94.38 | 1 |
| 503 | 7p | 25245 | 27003  | 1759  | chr7: 56434997 - 56436149<br>chr1: 219032574 - 219033728<br>chr7: 62455575 - 62457909<br>chr7: 51011956 - 51014002<br>chr7: 39391514 - 39393554<br>chr7: 55366459 - 55368463 | 94.28<br>96.70<br>94.13<br>94.60<br>95.13<br>94.73 | 94.93 | 1 |
| 504 | 7p | 27309 | 33084  | 5776  | chr1: 224460233 - 224466670                                                                                                                                                  | 94.16                                              | 94.16 | 0 |
| 505 | 7p | 31783 | 35468  | 3686  | 1p: 147657 - 151331                                                                                                                                                          | 97.15                                              | 97.15 | 0 |
| 506 | 7p | 31783 | 39251  | 7469  | 1p: 151063 - 158530                                                                                                                                                          | 98.42                                              | 98.42 | 0 |
| 507 | 7p | 31786 | 33084  | 1299  | chr7: 51020104 - 51021398                                                                                                                                                    | 95.16                                              | 95.16 | 1 |
| 508 | 7p | 31787 | 34361  | 2575  | chr7: 55375429 - 55378283<br>chr7: 56005902 - 56008476<br>chr7: 39386619 - 39389187<br>chr1: 219039323 - 219041899<br>chr1: 220447184 - 220449711                            | 95.35<br>95.07<br>94.37<br>95.26<br>96.43          | 95.3  | 1 |
| 509 | 7p | 35200 | 37796  | 2597  | chr7: 55375429 - 55383896                                                                                                                                                    | 93.93                                              | 93.93 | 1 |
| 510 | 7p | 35200 | 45231  | 10032 | chr7: 56005902 - 56021808                                                                                                                                                    | 92.74                                              | 92.74 | 1 |
| 511 | 7p | 35200 | 69447  | 34248 | chr1: 219039323 - 219081989                                                                                                                                                  | 97.25                                              | 97.25 | 0 |
| 512 | 7p | 35200 | 71832  | 36633 | chr4: 120688005 - 120730560<br>chr1: 239547046 - 239589627                                                                                                                   | 96.34<br>97.45                                     | 96.9  | 0 |
| 513 | 7p | 37576 | 71832  | 34257 | chr10: 38729667 - 38764372<br>chr4: 119870679 - 119899413                                                                                                                    | 97.00<br>97.37                                     | 97.19 | 0 |
| 514 | 7p | 37579 | 53708  | 16130 | chr7: 127645453 - 127661758                                                                                                                                                  | 95.91                                              | 95.91 | 1 |
| 515 | 7p | 37579 | 58830  | 21252 | chr7: 39360178 - 39381110                                                                                                                                                    | 92.86                                              | 92.86 | 1 |
| 516 | 7p | 37579 | 63550  | 25972 | chr1: 220455168 - 220481396                                                                                                                                                  | 97.68                                              | 97.68 | 0 |
| 517 | 7p | 37603 | 41850  | 4248  | chr7: 45392682 - 45396890                                                                                                                                                    | 95.99                                              | 95.99 | 1 |
| 518 | 7p | 38948 | 41850  | 2903  | chr7: 55385064 - 55388239                                                                                                                                                    | 92.96                                              | 92.96 | 1 |
| 519 | 7p | 38950 | 45231  | 6282  | chr7: 51029490 - 51036010                                                                                                                                                    | 92.76                                              | 92.76 | 1 |
| 520 | 7p | 40374 | 44471  | 4098  | chr11: 49999260 - 50003428<br>chr7: 56477111 - 56481294<br>chr7: 62412186 - 62416373                                                                                         | 90.94<br>92.19<br>92.19                            | 91.77 | 1 |

|     |    |        |        |        |                                                                                                                                                                                                                                                 |                                                                                                 |       |   |
|-----|----|--------|--------|--------|-------------------------------------------------------------------------------------------------------------------------------------------------------------------------------------------------------------------------------------------------|-------------------------------------------------------------------------------------------------|-------|---|
| 521 | 7p | 41598  | 44473  | 2876   | chr7: 64516409 - 64519292                                                                                                                                                                                                                       | 91.46                                                                                           | 91.46 | 1 |
| 522 | 7p | 41598  | 71832  | 30235  | 1p: 160844 - 191186                                                                                                                                                                                                                             | 98.24                                                                                           | 98.24 | 0 |
| 523 | 7p | 44629  | 50776  | 6148   | chr7: 65587537 - 65590704<br>chr7: 64511343 - 64515807                                                                                                                                                                                          | 91.48<br>91.43                                                                                  | 91.46 | 1 |
| 524 | 7p | 50174  | 102116 | 51943  | 9q: 51440 - 600                                                                                                                                                                                                                                 | 98.72                                                                                           | 98.72 | 0 |
| 525 | 7p | 50407  | 51792  | 1386   | chr7: 56025929 - 56027313                                                                                                                                                                                                                       | 93.19                                                                                           | 93.19 | 1 |
| 526 | 7p | 50414  | 71832  | 21419  | chr7: 45368447 - 45390152                                                                                                                                                                                                                       | 96.35                                                                                           | 96.35 | 1 |
| 527 | 7p | 52961  | 54425  | 1465   | chr7: 64507178 - 64508843                                                                                                                                                                                                                       | 91.9                                                                                            | 91.9  | 1 |
| 528 | 7p | 53445  | 58886  | 5442   | chr7: 56029594 - 56035175                                                                                                                                                                                                                       | 92.82                                                                                           | 92.82 | 1 |
| 529 | 7p | 59768  | 60894  | 1127   | chr7: 56036051 - 56037182                                                                                                                                                                                                                       | 92.33                                                                                           | 92.33 | 1 |
| 530 | 7p | 60855  | 69447  | 8593   | chr7: 127636388 - 127644996                                                                                                                                                                                                                     | 95.48                                                                                           | 95.48 | 1 |
| 531 | 7p | 63416  | 64900  | 1485   | chr7: 75222310 - 75223815<br>chr7: 65540950 - 65542445                                                                                                                                                                                          | 92.00<br>93.70                                                                                  | 92.85 | 1 |
| 532 | 7p | 65825  | 71832  | 6008   | chr11: 50209890 - 50211062                                                                                                                                                                                                                      | 90                                                                                              | 90    | 0 |
| 533 | 7p | 66399  | 67757  | 1359   | chr7: 63774859 - 63776243<br>chr7: 64469009 - 64470133                                                                                                                                                                                          | 90.56<br>90.16                                                                                  | 90.36 | 1 |
| 534 | 7p | 68043  | 71832  | 3790   | chr1: 220481705 - 220485566                                                                                                                                                                                                                     | 97.16                                                                                           | 97.16 | 0 |
| 535 | 7p | 71800  | 74951  | 3152   | 8p: 104622 - 108356<br>16q: 7774 - 5156<br>10q: 21274 - 18113<br>1q: 12159 - 9311<br>6p: 91944 - 95168<br>18p: 91554 - 95132<br>19q: 16701 - 13461<br>22q: 19684 - 16443<br>4p: 14618 - 17140<br>4q: 8783 - 6261<br>chr2: 114093933 - 114097169 | 97.24<br>95.38<br>93.71<br>93.28<br>92.94<br>94.44<br>96.73<br>96.98<br>94.05<br>94.27<br>96.79 | 95.07 | 0 |
| 536 | 7p | 71846  | 73336  | 1491   | 1p: 281741 - 283465<br>21q: 19448 - 18188                                                                                                                                                                                                       | 96.14<br>95.69                                                                                  | 95.91 | 0 |
| 537 | 7p | 73396  | 75083  | 1688   | 2p: 4878 - 6570                                                                                                                                                                                                                                 | 92.18                                                                                           | 92.18 | 0 |
| 538 | 7p | 74366  | 101860 | 27495  | 16q: 131367 - 105158                                                                                                                                                                                                                            | 98.15                                                                                           | 98.15 | 0 |
| 539 | 7p | 78903  | 88088  | 9186   | 17p: 727 - 18220                                                                                                                                                                                                                                | 97.62                                                                                           | 97.62 | 0 |
| 540 | 7p | 130045 | 141501 | 11457  | 3q: 99280 - 87850                                                                                                                                                                                                                               | 97.81                                                                                           | 97.81 | 0 |
| 541 | 7p | 130045 | 141501 | 11457  | 9q: 62988 - 51440                                                                                                                                                                                                                               | 97.81                                                                                           | 97.81 | 0 |
| 542 | 7q | 100663 | 102918 | 2256   | chr1: 148027673 - 148035069                                                                                                                                                                                                                     | 90.78                                                                                           | 90.78 | 0 |
| 543 | 8p | 1      | 25799  | 25799  | chr4: 119695468 - 119722637                                                                                                                                                                                                                     | 97.49                                                                                           | 97.49 | 0 |
| 544 | 8p | 1      | 29862  | 29862  | chr1: 239479475 - 239510646<br>chrY: 25807402 - 25838662<br>chrY: 24800028 - 24831294                                                                                                                                                           | 97.48<br>96.80<br>96.79                                                                         | 97.02 | 0 |
| 545 | 8p | 1      | 87928  | 87928  | 1p: 26996 - 118380                                                                                                                                                                                                                              | 98.82                                                                                           | 98.82 | 0 |
| 546 | 8p | 1      | 103892 | 103892 | 5q: 144676 - 42464                                                                                                                                                                                                                              | 98.75                                                                                           | 98.75 | 0 |
| 547 | 8p | 1      | 112857 | 112857 | 6q: 139657 - 34589                                                                                                                                                                                                                              | 98.49                                                                                           | 98.49 | 0 |
| 548 | 8p | 1591   | 29862  | 28272  | chr1: 220383273 - 220412991                                                                                                                                                                                                                     | 97.47                                                                                           | 97.47 | 0 |
| 549 | 8p | 19652  | 29862  | 10211  | 16q: 23961 - 13817                                                                                                                                                                                                                              | 97.45                                                                                           | 97.45 | 0 |
| 550 | 8p | 21631  | 29862  | 8232   | 2q: 8258 - 107                                                                                                                                                                                                                                  | 97.6                                                                                            | 97.6  | 0 |
| 551 | 8p | 25803  | 29862  | 4060   | chr4: 119944731 - 119948842                                                                                                                                                                                                                     | 97.74                                                                                           | 97.74 | 0 |
| 552 | 8p | 37604  | 103892 | 66289  | 19p: 68278 - 131513<br>6p: 16681 - 80537                                                                                                                                                                                                        | 98.33<br>98.00                                                                                  | 98.16 | 0 |
| 553 | 8p | 38266  | 81761  | 43496  | 15q: 116787 - 75307                                                                                                                                                                                                                             | 98.02                                                                                           | 98.02 | 0 |
| 554 | 8p | 38953  | 103892 | 64940  | 11p: 1 - 61585                                                                                                                                                                                                                                  | 98.27                                                                                           | 98.27 | 0 |
| 555 | 8p | 85490  | 112827 | 27338  | 20q: 50954 - 21029                                                                                                                                                                                                                              | 97.06                                                                                           | 97.06 | 0 |
| 556 | 8p | 85626  | 103892 | 18267  | chr1: 239518849 - 239537377<br>7p: 2360 - 20796<br>chr4: 119917953 - 119936314<br>chr10: 38782531 - 38800932<br>chrY: 25847059 - 25871516<br>chrY: 24767177 - 24791629<br>2q: 35177 - 17207<br>16q: 50788 - 32910                               | 96.96<br>98.07<br>96.82<br>96.80<br>96.28<br>96.27<br>97.05<br>97.70                            | 96.99 | 0 |
| 557 | 8p | 86034  | 89594  | 3561   | chr1: 220421937 - 220425497                                                                                                                                                                                                                     | 98.29                                                                                           | 98.29 | 0 |
| 558 | 8p | 86034  | 100468 | 14435  | chr4: 165542477 - 165556842                                                                                                                                                                                                                     | 95.67                                                                                           | 95.67 | 0 |
| 559 | 8p | 88011  | 89594  | 1584   | 1p: 118463 - 120046                                                                                                                                                                                                                             | 97.94                                                                                           | 97.94 | 0 |
| 560 | 8p | 89738  | 92145  | 2408   | 1p: 120190 - 122607                                                                                                                                                                                                                             | 97.61                                                                                           | 97.61 | 0 |
| 561 | 8p | 89738  | 103892 | 14155  | chr1: 220425641 - 220440302                                                                                                                                                                                                                     | 96.94                                                                                           | 96.94 | 0 |

|     |    |        |        |       |                                                                                                                                                                                                                                                                                                                                                            |                                                                                                                                              |       |   |
|-----|----|--------|--------|-------|------------------------------------------------------------------------------------------------------------------------------------------------------------------------------------------------------------------------------------------------------------------------------------------------------------------------------------------------------------|----------------------------------------------------------------------------------------------------------------------------------------------|-------|---|
| 562 | 8p | 94484  | 103892 | 9409  | 1p: 124946 - 134371                                                                                                                                                                                                                                                                                                                                        | 98.04                                                                                                                                        | 98.04 | 0 |
| 563 | 8p | 95651  | 97588  | 1938  | chr1: 224457839 - 224459772                                                                                                                                                                                                                                                                                                                                | 97.34                                                                                                                                        | 97.34 | 0 |
| 564 | 8p | 96353  | 103892 | 7540  | 3q: 7525 - 1                                                                                                                                                                                                                                                                                                                                               | 98.57                                                                                                                                        | 98.57 | 0 |
| 565 | 8p | 97943  | 103892 | 5950  | chr1: 224474330 - 224480262                                                                                                                                                                                                                                                                                                                                | 96.92                                                                                                                                        | 96.92 | 0 |
| 566 | 8p | 101522 | 103681 | 2160  | chr7: 61805021 - 61806480<br>chr1: 193837523 - 193839718<br>chr7: 55985248 - 55987635<br>chr7: 55420846 - 55423188<br>chr7: 45418635 - 45420987                                                                                                                                                                                                            | 92.11<br>92.26<br>95.95<br>92.48<br>96.53                                                                                                    | 93.87 | 0 |
| 567 | 8p | 104622 | 123046 | 18425 | 19p: 181737 - 198474                                                                                                                                                                                                                                                                                                                                       | 96.66                                                                                                                                        | 96.66 | 0 |
| 568 | 8p | 104976 | 108216 | 3241  | 11p: 111483 - 115213<br>7p: 71351 - 75083<br>9q: 25511 - 21779<br>3q: 60968 - 57236<br>16q: 105875 - 102143<br>16q: 7774 - 5157<br>1q: 12159 - 9312<br>10q: 21274 - 18114<br>6p: 91945 - 94769<br>19q: 16701 - 13462<br>18p: 91555 - 95132<br>22q: 19684 - 16444<br>chr2: 114093933 - 114097169<br>4p: 14618 - 17140<br>4q: 8783 - 6261<br>2p: 3251 - 6171 | 97.26<br>97.29<br>97.29<br>97.26<br>97.40<br>95.03<br>93.21<br>93.41<br>92.74<br>96.97<br>94.27<br>96.76<br>96.87<br>92.86<br>93.06<br>91.79 | 95.22 | 0 |
| 569 | 8p | 105117 | 106609 | 1493  | 1p: 281742 - 283465<br>21q: 19448 - 18188                                                                                                                                                                                                                                                                                                                  | 96.19<br>95.42                                                                                                                               | 95.81 | 0 |
| 570 | 8p | 112649 | 123045 | 10397 | 5q: 12435 - 1040<br>17q: 16920 - 3113<br>21q: 17129 - 4341<br>chr2: 114079706 - 114092879<br>10q: 17073 - 3832<br>22q: 15407 - 2136                                                                                                                                                                                                                        | 94.62<br>94.35<br>93.68<br>93.57<br>93.63<br>93.46                                                                                           | 93.88 | 0 |
| 571 | 8p | 113859 | 123046 | 9188  | 19q: 12422 - 639                                                                                                                                                                                                                                                                                                                                           | 93.73                                                                                                                                        | 93.73 | 0 |
| 572 | 8p | 116378 | 122805 | 6428  | 1q: 8975 - 1764<br>6q: 6609 - 1                                                                                                                                                                                                                                                                                                                            | 93.17<br>93.91                                                                                                                               | 93.54 | 0 |
| 573 | 8p | 120762 | 123146 | 2385  | 16q: 4133 - 1693<br>5p: 611 - 2409<br>4p: 11143 - 13573<br>4q: 5216 - 2781<br>18p: 88797 - 90510                                                                                                                                                                                                                                                           | 93.21<br>95.15<br>91.10<br>91.47<br>93.94                                                                                                    | 92.97 | 0 |
| 574 | 8p | 130338 | 135407 | 5070  | 6q: 137789 - 133279                                                                                                                                                                                                                                                                                                                                        | 97.71                                                                                                                                        | 97.71 | 0 |
| 575 | 8p | 134360 | 139412 | 5053  | 1p: 237672 - 242735                                                                                                                                                                                                                                                                                                                                        | 98.07                                                                                                                                        | 98.07 | 0 |
| 576 | 8p | 194471 | 231807 | 37337 | 1p: 245037 - 280290                                                                                                                                                                                                                                                                                                                                        | 97.26                                                                                                                                        | 97.26 | 0 |
| 577 | 8p | 279211 | 281570 | 2360  | 1p: 231380 - 233742                                                                                                                                                                                                                                                                                                                                        | 97.7                                                                                                                                         | 97.7  | 0 |
| 578 | 8p | 290588 | 307129 | 16542 | 2q: 91777 - 72438                                                                                                                                                                                                                                                                                                                                          | 96.56                                                                                                                                        | 96.56 | 0 |
| 579 | 8p | 307013 | 339694 | 32682 | 2q: 71986 - 37438                                                                                                                                                                                                                                                                                                                                          | 96                                                                                                                                           | 96    | 0 |
| 580 | 8p | 329082 | 353117 | 24036 | 1p: 205679 - 229635                                                                                                                                                                                                                                                                                                                                        | 96.36                                                                                                                                        | 96.36 | 0 |
| 581 | 8p | 329082 | 353122 | 24041 | chr1: 220511009 - 220534939                                                                                                                                                                                                                                                                                                                                | 96.07                                                                                                                                        | 96.07 | 0 |
| 582 | 8q | 79741  | 83765  | 4025  | chr14: 74667926 - 74713049                                                                                                                                                                                                                                                                                                                                 | 93.22                                                                                                                                        | 93.22 | 0 |
| 583 | 8q | 286728 | 288864 | 2137  | chr3: 144028602 - 144029269<br>chr3: 175577873 - 175578523                                                                                                                                                                                                                                                                                                 | 93.25<br>91.93                                                                                                                               | 92.59 | 0 |
| 584 | 8q | 287142 | 288272 | 1131  | chr21: 30557745 - 30558070                                                                                                                                                                                                                                                                                                                                 | 91.96                                                                                                                                        | 91.96 | 0 |
| 585 | 9p | 1894   | 9953   | 8060  | Xq: 10579 - 2524<br>16p: 1462 - 9529<br>Yq: 10579 - 2524                                                                                                                                                                                                                                                                                                   | 98.23<br>98.08<br>98.23                                                                                                                      | 98.18 | 0 |
| 586 | 9p | 1894   | 27840  | 25947 | 15q: 28282 - 2004                                                                                                                                                                                                                                                                                                                                          | 98.32                                                                                                                                        | 98.32 | 0 |
| 587 | 9p | 1901   | 80815  | 78915 | chr2: 113998296 - 114074366                                                                                                                                                                                                                                                                                                                                | 98.07                                                                                                                                        | 98.07 | 0 |
| 588 | 9p | 8506   | 27840  | 19335 | 19p: 1 - 19667                                                                                                                                                                                                                                                                                                                                             | 98.82                                                                                                                                        | 98.82 | 0 |
| 589 | 9p | 23892  | 37630  | 13739 | 12p: 1705 - 15778                                                                                                                                                                                                                                                                                                                                          | 97.01                                                                                                                                        | 97.01 | 0 |
| 590 | 9p | 41356  | 61444  | 20089 | chr9: 67170612 - 67190611                                                                                                                                                                                                                                                                                                                                  | 97.67                                                                                                                                        | 97.67 | 1 |
| 591 | 9p | 41356  | 63095  | 21740 | chr9: 66932464 - 66954161                                                                                                                                                                                                                                                                                                                                  | 97.66                                                                                                                                        | 97.66 | 1 |
| 592 | 9p | 41356  | 80815  | 39460 | chr9: 68181420 - 68220146                                                                                                                                                                                                                                                                                                                                  | 97.34                                                                                                                                        | 97.34 | 1 |
| 593 | 9p | 61591  | 63095  | 1505  | chr9: 67190615 - 67192109                                                                                                                                                                                                                                                                                                                                  | 97.7                                                                                                                                         | 97.7  | 1 |



|     |    |        |        |        |                                                                                                                                                                                                                                                 |                                                                                                 |       |   |
|-----|----|--------|--------|--------|-------------------------------------------------------------------------------------------------------------------------------------------------------------------------------------------------------------------------------------------------|-------------------------------------------------------------------------------------------------|-------|---|
| 594 | 9p | 63335  | 64473  | 1139   | chr9: 67192374 - 67193524<br>chr9: 66954430 - 66955594                                                                                                                                                                                          | 94.42<br>93.81                                                                                  | 94.12 | 1 |
| 595 | 9p | 64523  | 81099  | 16577  | chr9: 67193574 - 67209106                                                                                                                                                                                                                       | 97.45                                                                                           | 97.45 | 1 |
| 596 | 9p | 64523  | 88614  | 24092  | chr9: 66955644 - 66978778                                                                                                                                                                                                                       | 97.43                                                                                           | 97.43 | 1 |
| 597 | 9p | 80698  | 193743 | 113046 | chr2: 113886167 - 113998262                                                                                                                                                                                                                     | 97.86                                                                                           | 97.86 | 0 |
| 598 | 9p | 80699  | 190123 | 109425 | chr9: 68061572 - 68181380                                                                                                                                                                                                                       | 97.14                                                                                           | 97.14 | 1 |
| 599 | 9p | 82372  | 88610  | 6239   | chr9: 67210389 - 67216665                                                                                                                                                                                                                       | 97.79                                                                                           | 97.79 | 1 |
| 600 | 9p | 85947  | 92929  | 6983   | chr11: 43103310 - 43113360                                                                                                                                                                                                                      | 91.93                                                                                           | 91.93 | 0 |
| 601 | 9p | 89455  | 92929  | 3475   | chr9: 66979634 - 66982999                                                                                                                                                                                                                       | 97.72                                                                                           | 97.72 | 1 |
| 602 | 9p | 90396  | 103518 | 13123  | chr9: 67218352 - 67241667                                                                                                                                                                                                                       | 96.16                                                                                           | 96.16 | 1 |
| 603 | 9p | 106558 | 147516 | 40959  | chr9: 67931971 - 67973226                                                                                                                                                                                                                       | 97.34                                                                                           | 97.34 | 1 |
| 604 | 9p | 147662 | 185398 | 37737  | chr9: 67973370 - 68011244                                                                                                                                                                                                                       | 97.04                                                                                           | 97.04 | 1 |
| 605 | 9p | 191457 | 193743 | 2287   | chr9: 66892011 - 66894295                                                                                                                                                                                                                       | 97                                                                                              | 97    | 1 |
| 606 | 9p | 191457 | 193743 | 2287   | chr9: 67131003 - 67133287                                                                                                                                                                                                                       | 97.37                                                                                           | 97.37 | 1 |
| 607 | 9q | 600    | 51440  | 50841  | 7p: 50174 - 102116                                                                                                                                                                                                                              | 98.72                                                                                           | 98.72 | 0 |
| 608 | 9q | 833    | 2218   | 1386   | chr7: 56025929 - 56027313                                                                                                                                                                                                                       | 92.79                                                                                           | 92.79 | 0 |
| 609 | 9q | 834    | 88449  | 87616  | 3q: 119439 - 36117                                                                                                                                                                                                                              | 97.77                                                                                           | 97.77 | 0 |
| 610 | 9q | 834    | 39467  | 38634  | 11p: 90403 - 128459                                                                                                                                                                                                                             | 98.32                                                                                           | 98.32 | 0 |
| 611 | 9q | 834    | 25504  | 24671  | 19p: 160708 - 185461                                                                                                                                                                                                                            | 98.31                                                                                           | 98.31 | 0 |
| 612 | 9q | 834    | 24171  | 23338  | 16q: 104535 - 81201                                                                                                                                                                                                                             | 98.96                                                                                           | 98.96 | 0 |
| 613 | 9q | 834    | 16434  | 15601  | 5q: 189359 - 173588                                                                                                                                                                                                                             | 98.03                                                                                           | 98.03 | 0 |
| 614 | 9q | 839    | 22260  | 21422  | 1p: 169656 - 191186<br>chr10: 38729667 - 38751317<br>chr4: 119870679 - 119886584<br>chr4: 120708845 - 120730560<br>chr1: 239567905 - 239589627<br>chr7: 45368447 - 45390152                                                                     | 98.28<br>97.05<br>97.43<br>96.42<br>97.50<br>96.43                                              | 97.19 | 0 |
| 615 | 9q | 840    | 19881  | 19042  | chr1: 219062780 - 219081989                                                                                                                                                                                                                     | 97.31                                                                                           | 97.31 | 0 |
| 616 | 9q | 840    | 13985  | 13146  | chr1: 220467995 - 220481396                                                                                                                                                                                                                     | 97.8                                                                                            | 97.8  | 0 |
| 617 | 9q | 840    | 4134   | 3295   | chr7: 127645453 - 127648924                                                                                                                                                                                                                     | 96.06                                                                                           | 96.06 | 0 |
| 618 | 9q | 870    | 9260   | 8391   | chr7: 39360178 - 39369360                                                                                                                                                                                                                       | 92.67                                                                                           | 92.67 | 0 |
| 619 | 9q | 3387   | 4855   | 1469   | chr7: 64507178 - 64508843                                                                                                                                                                                                                       | 92.18                                                                                           | 92.18 | 0 |
| 620 | 9q | 3871   | 9316   | 5446   | chr7: 56029594 - 56035175                                                                                                                                                                                                                       | 92.94                                                                                           | 92.94 | 0 |
| 621 | 9q | 5090   | 6480   | 1391   | chr7: 65561411 - 65562799                                                                                                                                                                                                                       | 90.72                                                                                           | 90.72 | 0 |
| 622 | 9q | 10199  | 11325  | 1127   | chr7: 56036051 - 56037182                                                                                                                                                                                                                       | 92.85                                                                                           | 92.85 | 0 |
| 623 | 9q | 11286  | 19881  | 8596   | chr7: 127636388 - 127644996                                                                                                                                                                                                                     | 95.54                                                                                           | 95.54 | 0 |
| 624 | 9q | 13851  | 15335  | 1485   | chr7: 75222310 - 75223815<br>chr7: 65540950 - 65542445                                                                                                                                                                                          | 92.31<br>94.03                                                                                  | 93.17 | 0 |
| 625 | 9q | 16259  | 22260  | 6002   | chr11: 50209890 - 50211062                                                                                                                                                                                                                      | 90                                                                                              | 90    | 0 |
| 626 | 9q | 16833  | 18191  | 1359   | chr7: 63774859 - 63776243<br>chr7: 64469009 - 64470133                                                                                                                                                                                          | 90.56<br>90.32                                                                                  | 90.44 | 0 |
| 627 | 9q | 18477  | 22260  | 3784   | chr1: 220481705 - 220485566                                                                                                                                                                                                                     | 97.22                                                                                           | 97.22 | 0 |
| 628 | 9q | 22230  | 25379  | 3150   | 8p: 104641 - 108356<br>16q: 7774 - 5156<br>10q: 21274 - 18113<br>1q: 12159 - 9311<br>6p: 91944 - 95168<br>18p: 91554 - 95132<br>22q: 19684 - 16443<br>19q: 16701 - 13461<br>chr2: 114093933 - 114097169<br>4q: 8783 - 6261<br>4p: 14618 - 17140 | 97.23<br>95.15<br>93.87<br>93.28<br>92.94<br>94.44<br>96.98<br>96.73<br>96.79<br>94.27<br>94.05 | 95.07 | 0 |
| 629 | 9q | 22274  | 23764  | 1491   | 1p: 281741 - 283465<br>21q: 19448 - 18188                                                                                                                                                                                                       | 96.14<br>95.69                                                                                  | 95.91 | 0 |
| 630 | 9q | 23824  | 25511  | 1688   | 2p: 4878 - 6570                                                                                                                                                                                                                                 | 92.18                                                                                           | 92.18 | 0 |
| 631 | 9q | 24794  | 51184  | 26391  | 16q: 131367 - 105158                                                                                                                                                                                                                            | 98.25                                                                                           | 98.25 | 0 |
| 632 | 9q | 29318  | 37610  | 8293   | 17p: 727 - 18220                                                                                                                                                                                                                                | 97.63                                                                                           | 97.63 | 0 |
| 633 | 9q | 51440  | 62988  | 11549  | 7p: 130045 - 141501                                                                                                                                                                                                                             | 97.95                                                                                           | 97.95 | 0 |
| 634 | 9q | 63045  | 124136 | 61092  | 10p: 10952 - 74445                                                                                                                                                                                                                              | 94.32                                                                                           | 94.32 | 0 |
| 635 | 9q | 63045  | 108804 | 45760  | 18p: 15346 - 63444                                                                                                                                                                                                                              | 95.07                                                                                           | 95.07 | 0 |
| 636 | 9q | 63059  | 88449  | 25391  | chr12: 34168581 - 34211062                                                                                                                                                                                                                      | 91.23                                                                                           | 91.23 | 0 |
| 637 | 9q | 64550  | 88437  | 23888  | chrY: 18042510 - 18076998                                                                                                                                                                                                                       | 91.08                                                                                           | 91.08 | 0 |
| 638 | 9q | 64550  | 70669  | 6120   | chrY: 18957030 - 18963521                                                                                                                                                                                                                       | 91.28                                                                                           | 91.28 | 0 |

|     |     |        |        |       |                                                                                                                |                                  |       |   |
|-----|-----|--------|--------|-------|----------------------------------------------------------------------------------------------------------------|----------------------------------|-------|---|
| 639 | 9q  | 65244  | 83002  | 17759 | 1p: 286972 - 301429                                                                                            | 93.79                            | 93.79 | 0 |
| 640 | 9q  | 69973  | 71163  | 1191  | chrY: 10567257 - 10568441                                                                                      | 92.43                            | 92.43 | 0 |
| 641 | 9q  | 77401  | 83002  | 5602  | 4q: 126874 - 121031                                                                                            | 93.56                            | 93.56 | 0 |
| 642 | 9q  | 78086  | 80030  | 1945  | chrY: 18940700 - 18942639                                                                                      | 91.28                            | 91.28 | 0 |
| 643 | 9q  | 81025  | 88447  | 7423  | 16q: 138855 - 131467<br>chr12: 36865089 - 36876160                                                             | 95.54<br>91.04                   | 93.29 | 0 |
| 644 | 9q  | 83210  | 87892  | 4683  | 4q: 121040 - 109513<br>chr1: 223993648 - 224001019                                                             | 93.15<br>91.02                   | 92.09 | 0 |
| 645 | 9q  | 86916  | 88448  | 1533  | chrY: 10552604 - 10554424<br>chr3: 75834770 - 75835986                                                         | 92.56<br>90.76                   | 91.66 | 0 |
| 646 | 9q  | 108847 | 133085 | 24239 | 18p: 63487 - 87912                                                                                             | 97.5                             | 97.5  | 0 |
| 647 | 9q  | 113409 | 129597 | 16189 | 16p: 17959 - 37573                                                                                             | 91.9                             | 91.9  | 0 |
| 648 | 9q  | 113409 | 123870 | 10462 | Yq: 29837 - 19014<br>Xq: 29837 - 19014                                                                         | 92.79<br>92.79                   | 92.79 | 0 |
| 649 | 10p | 1      | 13334  | 13334 | chr1: 224017101 - 224033315                                                                                    | 90.94                            | 90.94 | 0 |
| 650 | 10p | 1      | 39687  | 39687 | chr12: 34147628 - 34211062                                                                                     | 90.9                             | 90.9  | 0 |
| 651 | 10p | 1      | 59732  | 59732 | 18p: 4415 - 63117                                                                                              | 97.6                             | 97.6  | 0 |
| 652 | 10p | 28     | 3077   | 3050  | chr2: 132394730 - 132398023<br>chr22: 14844180 - 14847482<br>chr14: 18424456 - 18427756<br>1p: 284205 - 286519 | 94.87<br>94.25<br>94.25<br>93.81 | 94.3  | 0 |
| 653 | 10p | 10584  | 18600  | 8017  | chrY: 18957030 - 18965446                                                                                      | 90.75                            | 90.75 | 0 |
| 654 | 10p | 10768  | 39371  | 28604 | chrY: 18040585 - 18076372<br>3q: 119439 - 99337                                                                | 90.58<br>95.08                   | 92.83 | 0 |
| 655 | 10p | 10952  | 74445  | 63494 | 9q: 124136 - 63045                                                                                             | 94.26                            | 94.26 | 0 |
| 656 | 10p | 13173  | 19094  | 5922  | chrY: 10567257 - 10573176                                                                                      | 91.41                            | 91.41 | 0 |
| 657 | 10p | 13173  | 34283  | 21111 | 1p: 286972 - 301421                                                                                            | 93.58                            | 93.58 | 0 |
| 658 | 10p | 29169  | 34592  | 5424  | 4q: 126874 - 121031<br>chrY: 18937298 - 18942639                                                               | 93.29<br>90.00                   | 91.65 | 0 |
| 659 | 10p | 32563  | 39685  | 7123  | 16q: 138855 - 131398<br>chr12: 36865089 - 36875578                                                             | 95.18<br>92.08                   | 93.63 | 0 |
| 660 | 10p | 33046  | 34901  | 1856  | chr1: 223987482 - 223989310                                                                                    | 91.19                            | 91.19 | 0 |
| 661 | 10p | 34674  | 39316  | 4643  | 4q: 121040 - 109513<br>chr1: 223993648 - 224001050<br>chrY: 10552604 - 10561454                                | 92.52<br>92.00<br>91.79          | 92.1  | 0 |
| 662 | 10p | 60126  | 74443  | 14318 | 18p: 63527 - 79293                                                                                             | 93.08                            | 93.08 | 0 |
| 663 | 10p | 64762  | 74460  | 9699  | 16p: 17959 - 29051<br>Xq: 30139 - 19014                                                                        | 92.01<br>92.24                   | 92.12 | 0 |
| 664 | 10p | 64762  | 74476  | 9715  | Yq: 30139 - 19014                                                                                              | 92.24                            | 92.24 | 0 |
| 665 | 10q | 3829   | 21689  | 17861 | chr2: 114079703 - 114097183                                                                                    | 96.02                            | 96.02 | 0 |
| 666 | 10q | 3829   | 5438   | 1610  | 6q: 141080 - 139446                                                                                            | 92.03                            | 92.03 | 0 |
| 667 | 10q | 3830   | 17532  | 13703 | 19p: 189683 - 199397<br>8p: 112649 - 123046                                                                    | 96.02<br>93.54                   | 94.78 | 0 |
| 668 | 10q | 5039   | 21689  | 16651 | 19q: 16715 - 639<br>22q: 19698 - 3342                                                                          | 96.10<br>95.79                   | 95.94 | 0 |
| 669 | 10q | 5039   | 19372  | 14334 | 21q: 19448 - 5548                                                                                              | 96.59                            | 96.59 | 0 |
| 670 | 10q | 5039   | 17677  | 12639 | 17q: 17504 - 4319<br>5q: 13019 - 2247                                                                          | 94.93<br>95.77                   | 95.35 | 0 |
| 671 | 10q | 8629   | 21274  | 12646 | 1q: 12159 - 1764                                                                                               | 93.97                            | 93.97 | 0 |
| 672 | 10q | 8629   | 12450  | 3822  | chr3: 75756447 - 75760281                                                                                      | 93.7                             | 93.7  | 0 |
| 673 | 10q | 8719   | 17677  | 8959  | 6q: 7193 - 1                                                                                                   | 94.94                            | 94.94 | 0 |
| 674 | 10q | 12304  | 21689  | 9386  | 4p: 7699 - 17154                                                                                               | 91.42                            | 91.42 | 0 |
| 675 | 10q | 14669  | 21689  | 7021  | 5p: 617 - 2421                                                                                                 | 93.28                            | 93.28 | 0 |
| 676 | 10q | 14670  | 20034  | 5365  | 16q: 7077 - 1705                                                                                               | 93.33                            | 93.33 | 0 |
| 677 | 10q | 14674  | 46814  | 32141 | 4q: 36107 - 2781                                                                                               | 97.36                            | 97.36 | 0 |
| 678 | 10q | 15394  | 26302  | 10909 | 18p: 88797 - 102436                                                                                            | 95.86                            | 95.86 | 0 |
|     |     |        |        |       | 2p: 3280 - 4793                                                                                                |                                  |       |   |

|     |     |        |        |        |                                                                                                                                                            |                                                             |       |   |
|-----|-----|--------|--------|--------|------------------------------------------------------------------------------------------------------------------------------------------------------------|-------------------------------------------------------------|-------|---|
| 680 | 10q | 18113  | 21273  | 3161   | 19p: 182231 - 185062<br>7p: 71845 - 74683<br>3q: 60572 - 57730<br>9q: 25111 - 22273<br>16q: 105475 - 102637<br>11p: 111977 - 114819<br>8p: 105117 - 107957 | 94.11<br>94.10<br>93.98<br>94.26<br>94.26<br>93.98<br>93.86 | 94.08 | 0 |
| 681 | 10q | 19907  | 21274  | 1368   | 2p: 5103 - 6171                                                                                                                                            | 92.86                                                       | 92.86 | 0 |
| 682 | 10q | 26091  | 46139  | 20049  | 4q: 38723 - 18742                                                                                                                                          | 98.93                                                       | 98.93 | 0 |
| 683 | 10q | 26091  | 42829  | 16739  | 4q: 38723 - 22035                                                                                                                                          | 98.94                                                       | 98.94 | 0 |
| 684 | 10q | 26091  | 40278  | 14188  | 4q: 39488 - 25335                                                                                                                                          | 98.83                                                       | 98.83 | 0 |
| 685 | 10q | 26091  | 37163  | 11073  | 4q: 39682 - 28629                                                                                                                                          | 98.84                                                       | 98.84 | 0 |
| 686 | 10q | 26091  | 33868  | 7778   | 4q: 39686 - 31922                                                                                                                                          | 98.75                                                       | 98.75 | 0 |
| 687 | 10q | 26091  | 30558  | 4468   | 4q: 39686 - 35215                                                                                                                                          | 98.61                                                       | 98.61 | 0 |
| 688 | 10q | 26091  | 27259  | 1169   | 4q: 39686 - 38512                                                                                                                                          | 98.29                                                       | 98.29 | 0 |
| 689 | 10q | 29390  | 46814  | 17425  | 4q: 32814 - 15442                                                                                                                                          | 98.91                                                       | 98.91 | 0 |
| 690 | 10q | 32700  | 46814  | 14115  | 4q: 29521 - 15442                                                                                                                                          | 98.87                                                       | 98.87 | 0 |
| 691 | 10q | 33086  | 34151  | 1066   | chr3: 75800797 - 75801859<br>4q: 83327 - 82274                                                                                                             | 91.00<br>98.00                                              | 94.5  | 0 |
| 692 | 10q | 35999  | 46814  | 10816  | 4q: 26221 - 15442                                                                                                                                          | 98.94                                                       | 98.94 | 0 |
| 693 | 10q | 39308  | 46814  | 7507   | 4q: 22927 - 15442                                                                                                                                          | 98.85                                                       | 98.85 | 0 |
| 694 | 10q | 42618  | 46814  | 4197   | 4q: 19634 - 15442                                                                                                                                          | 98.66                                                       | 98.66 | 0 |
| 695 | 10q | 43004  | 44069  | 1066   | chr3: 75800797 - 75801859<br>4q: 83327 - 82274                                                                                                             | 91.00<br>98.00                                              | 94.5  | 0 |
| 696 | 10q | 46814  | 88677  | 41864  | 4q: 81906 - 39686                                                                                                                                          | 98.55                                                       | 98.55 | 0 |
| 697 | 10q | 48653  | 57770  | 9118   | chrY: 18829808 - 18838126<br>chrY: 18167906 - 18176224                                                                                                     | 90.00<br>90.00                                              | 90    | 0 |
| 698 | 10q | 50662  | 88610  | 37949  | chr3: 75761698 - 75800337                                                                                                                                  | 95.44                                                       | 95.44 | 0 |
| 699 | 10q | 51576  | 56678  | 5103   | chr12: 36756559 - 36761457                                                                                                                                 | 90.76                                                       | 90.76 | 0 |
| 700 | 10q | 74008  | 86451  | 12444  | chr16: 34561514 - 34569480                                                                                                                                 | 90                                                          | 90    | 0 |
| 701 | 10q | 96865  | 98332  | 1468   | chr5: 169326378 - 169329979                                                                                                                                | 91.62                                                       | 91.62 | 0 |
| 702 | 10q | 469322 | 470901 | 1580   | chr13: 83378198 - 83379391                                                                                                                                 | 91.44                                                       | 91.44 | 0 |
| 703 | 10q | 470021 | 473387 | 3367   | chr8: 33697501 - 33698875                                                                                                                                  | 91.35                                                       | 91.35 | 0 |
| 704 | 10q | 470172 | 471273 | 1102   | chrX: 26335756 - 26336472                                                                                                                                  | 92                                                          | 92    | 0 |
| 705 | 11p | 1      | 39454  | 39454  | 15q: 116787 - 75995                                                                                                                                        | 98.17                                                       | 98.17 | 0 |
| 706 | 11p | 1      | 47285  | 47285  | 1p: 71832 - 120046                                                                                                                                         | 98.62                                                       | 98.62 | 0 |
| 707 | 11p | 1      | 54766  | 54766  | 6q: 133275 - 73642                                                                                                                                         | 98.62                                                       | 98.62 | 0 |
| 708 | 11p | 1      | 61585  | 61585  | 8p: 38953 - 103892                                                                                                                                         | 98.36                                                       | 98.36 | 0 |
| 709 | 11p | 1      | 73516  | 73516  | 6p: 18035 - 87328                                                                                                                                          | 98.33                                                       | 98.33 | 0 |
| 710 | 11p | 1      | 90919  | 90919  | 5q: 174104 - 81451                                                                                                                                         | 98.6                                                        | 98.6  | 0 |
| 711 | 11p | 1      | 115208 | 115208 | 19p: 69632 - 185461                                                                                                                                        | 98.61                                                       | 98.61 | 0 |
| 712 | 11p | 43183  | 68406  | 25224  | chrY: 24760333 - 24791629<br>chrY: 25847059 - 25878360                                                                                                     | 96.11<br>96.12                                              | 96.12 | 0 |
| 713 | 11p | 43183  | 74176  | 30994  | 20q: 46227 - 21029<br>chr10: 38769816 - 38800932<br>chr4: 119904873 - 119936314<br>chr1: 239518849 - 239549617                                             | 97.66<br>96.56<br>96.67<br>97.15                            | 97.01 | 0 |
| 714 | 11p | 43183  | 125961 | 82779  | 7p: 2360 - 88088                                                                                                                                           | 98.7                                                        | 98.7  | 0 |
| 715 | 11p | 43725  | 47285  | 3561   | chr1: 220421937 - 220425497                                                                                                                                | 97.8                                                        | 97.8  | 0 |
| 716 | 11p | 43725  | 57778  | 14054  | chr4: 165542477 - 165556462                                                                                                                                | 95.7                                                        | 95.7  | 0 |
| 717 | 11p | 43725  | 63564  | 19840  | 2q: 37420 - 17207                                                                                                                                          | 97.38                                                       | 97.38 | 0 |
| 718 | 11p | 43725  | 90919  | 47195  | 16q: 81717 - 32910                                                                                                                                         | 98.28                                                       | 98.28 | 0 |
| 719 | 11p | 47429  | 48608  | 1180   | 1p: 120190 - 121369                                                                                                                                        | 98.33                                                       | 98.33 | 0 |
| 720 | 11p | 47429  | 67203  | 19775  | chr1: 220425641 - 220445916                                                                                                                                | 97.25                                                       | 97.25 | 0 |
| 721 | 11p | 52220  | 75496  | 23277  | 1p: 124981 - 147924                                                                                                                                        | 98.57                                                       | 98.57 | 0 |
| 722 | 11p | 53357  | 55279  | 1923   | chr1: 224457849 - 224459772                                                                                                                                | 96.91                                                       | 96.91 | 0 |
| 723 | 11p | 54057  | 90919  | 36863  | 3q: 36633 - 1                                                                                                                                              | 98.84                                                       | 98.84 | 0 |
| 724 | 11p | 55651  | 68406  | 12756  | chr1: 224467506 - 224480247                                                                                                                                | 96.85                                                       | 96.85 | 0 |
| 725 | 11p | 59210  | 68109  | 8900   | chr7: 55985248 - 55994150                                                                                                                                  | 94.76                                                       | 94.76 | 0 |
| 726 | 11p | 59213  | 61532  | 2320   | chr1: 193837523 - 193839718<br>chr7: 61805021 - 61807375<br>chr7: 55420846 - 55423188                                                                      | 92.86<br>91.53<br>93.06                                     | 92.48 | 0 |
| 727 | 11p | 59233  | 65948  | 6716   | chr7: 45414266 - 45420987                                                                                                                                  | 95                                                          | 95    | 0 |
| 728 | 11p | 63196  | 74396  | 11201  | chr7: 127667226 - 127677946                                                                                                                                | 96.5                                                        | 96.5  | 0 |

|     |     |        |        |       |                                                                                                                                                                              |                                                    |       |   |
|-----|-----|--------|--------|-------|------------------------------------------------------------------------------------------------------------------------------------------------------------------------------|----------------------------------------------------|-------|---|
| 729 | 11p | 63215  | 65948  | 2734  | chr7: 51009103 - 51011866<br>chr7: 39393644 - 39396387<br>chr7: 62457999 - 62460749<br>chr7: 55363599 - 55366358<br>chr7: 56432157 - 56434907<br>chr1: 219029846 - 219032485 | 93.00<br>93.00<br>94.00<br>94.00<br>94.00<br>97.00 | 94.17 | 0 |
| 730 | 11p | 64519  | 74396  | 9878  | chr4: 120680507 - 120690578<br>chr1: 219032574 - 219033728                                                                                                                   | 95.34<br>96.69                                     | 95.34 | 0 |
| 731 | 11p | 66038  | 67805  | 1768  | chr7: 56434997 - 56436149<br>chr7: 62455575 - 62457909<br>chr7: 55366448 - 55368463<br>chr7: 39391514 - 39393554<br>chr7: 51011956 - 51014002                                | 94.28<br>94.37<br>94.45<br>95.13<br>94.85          | 94.96 | 0 |
| 732 | 11p | 66038  | 74396  | 8359  | chr7: 45402369 - 45414176                                                                                                                                                    | 94.75                                              | 94.75 | 0 |
| 733 | 11p | 68111  | 73105  | 4995  | chr1: 224460233 - 224466670                                                                                                                                                  | 94.16                                              | 94.16 | 0 |
| 734 | 11p | 71805  | 75496  | 3692  | 1p: 147657 - 151331                                                                                                                                                          | 97.75                                              | 97.75 | 0 |
| 735 | 11p | 71805  | 79340  | 7536  | 1p: 151063 - 158591                                                                                                                                                          | 98.6                                               | 98.6  | 0 |
| 736 | 11p | 71808  | 73105  | 1298  | chr7: 51020104 - 51021398                                                                                                                                                    | 95.17                                              | 95.17 | 0 |
| 737 | 11p | 71809  | 74389  | 2581  | chr7: 55375429 - 55378283<br>chr1: 219039323 - 219041899<br>chr7: 39386619 - 39389187<br>chr7: 56005902 - 56008476<br>chr1: 220447184 - 220449711                            | 96.28<br>96.21<br>95.33<br>96.03<br>97.32          | 96.23 | 0 |
| 738 | 11p | 75228  | 91791  | 16564 | chr7: 56005902 - 56027313                                                                                                                                                    | 92.81                                              | 92.81 | 0 |
| 739 | 11p | 75228  | 111964 | 36737 | chr4: 120688005 - 120730560                                                                                                                                                  | 96.42                                              | 96.42 | 0 |
| 740 | 11p | 75259  | 77944  | 2686  | chr1: 239547046 - 239555313<br>chr1: 219039323 - 219047615<br>chr7: 56015725 - 56026447                                                                                      | 98.00<br>97.50<br>90.25                            | 95.25 | 0 |
| 741 | 11p | 77607  | 103679 | 26073 | chr1: 220455168 - 220481396                                                                                                                                                  | 97.7                                               | 97.7  | 0 |
| 742 | 11p | 77609  | 85222  | 7614  | chr7: 51028105 - 51036010                                                                                                                                                    | 92.24                                              | 92.24 | 0 |
| 743 | 11p | 77631  | 81842  | 4212  | chr7: 45392682 - 45396890                                                                                                                                                    | 96.21                                              | 96.21 | 0 |
| 744 | 11p | 77787  | 90919  | 13133 | chr10: 38750807 - 38764372<br>chr4: 119886074 - 119899413<br>chr7: 39368881 - 39380748<br>chr7: 127648414 - 127661395                                                        | 97.22<br>97.89<br>93.47<br>95.80                   | 96.09 | 0 |
| 745 | 11p | 77970  | 109571 | 31602 | chr1: 219047720 - 219081989                                                                                                                                                  | 97.14                                              | 97.14 | 0 |
| 746 | 11p | 77970  | 111964 | 33995 | chr1: 239555446 - 239589627                                                                                                                                                  | 97.21                                              | 97.21 | 0 |
| 747 | 11p | 78976  | 81842  | 2867  | chr7: 55385064 - 55388239                                                                                                                                                    | 93.7                                               | 93.7  | 0 |
| 748 | 11p | 78976  | 84462  | 5487  | chr11: 49997861 - 50003428<br>chr7: 62412186 - 62417768<br>chr7: 56475714 - 56481294                                                                                         | 90.62<br>91.43<br>91.43                            | 91.16 | 1 |
| 749 | 11p | 81590  | 84464  | 2875  | chr7: 64516409 - 64519292                                                                                                                                                    | 91.91                                              | 91.91 | 0 |
| 750 | 11p | 81590  | 90614  | 9025  | chr7: 65587844 - 65593232                                                                                                                                                    | 91.11                                              | 91.11 | 0 |
| 751 | 11p | 81590  | 111964 | 30375 | 1p: 160844 - 191186                                                                                                                                                          | 98.33                                              | 98.33 | 0 |
| 752 | 11p | 85078  | 90622  | 5545  | chr7: 64511343 - 64515807                                                                                                                                                    | 91.43                                              | 91.43 | 0 |
| 753 | 11p | 90763  | 111964 | 21202 | chr7: 45368447 - 45390152<br>chr10: 38729667 - 38750786<br>chr4: 119870679 - 119886048                                                                                       | 96.20<br>96.94<br>97.35                            | 96.83 | 0 |
| 754 | 11p | 90941  | 93849  | 2909  | chr7: 127645453 - 127648385                                                                                                                                                  | 96.44                                              | 96.44 | 0 |
| 755 | 11p | 90941  | 98964  | 8024  | chr7: 39360178 - 39368857                                                                                                                                                    | 92.71                                              | 92.71 | 0 |
| 756 | 11p | 90941  | 106130 | 15190 | 5q: 189359 - 174125                                                                                                                                                          | 98.11                                              | 98.11 | 0 |
| 757 | 11p | 90941  | 125961 | 35021 | 9q: 37610 - 1370<br>3q: 73851 - 36653<br>16q: 117597 - 81737                                                                                                                 | 98.29<br>98.54<br>98.30                            | 98.38 | 0 |
| 758 | 11p | 93102  | 94582  | 1481  | chr7: 64507178 - 64508843                                                                                                                                                    | 92.35                                              | 92.35 | 0 |
| 759 | 11p | 93586  | 99020  | 5435  | chr7: 56029594 - 56035175                                                                                                                                                    | 92.59                                              | 92.59 | 0 |
| 760 | 11p | 99886  | 101019 | 1134  | chr7: 56036051 - 56037182                                                                                                                                                    | 92.73                                              | 92.73 | 0 |
| 761 | 11p | 100980 | 109571 | 8592  | chr7: 127636388 - 127644996                                                                                                                                                  | 95.35                                              | 95.35 | 0 |
| 762 | 11p | 103545 | 105029 | 1485  | chr7: 75222310 - 75223815<br>chr7: 65540950 - 65542445                                                                                                                       | 92.68<br>94.03                                     | 93.36 | 0 |
| 763 | 11p | 105959 | 111964 | 6006  | chr11: 50209890 - 50211058                                                                                                                                                   | 90                                                 | 90    | 1 |
| 764 | 11p | 106526 | 107887 | 1362  | chr7: 63774859 - 63776250<br>chr7: 64469009 - 64470133                                                                                                                       | 90.56<br>90.16                                     | 90.36 | 0 |
| 765 | 11p | 108173 | 111964 | 3792  | chr1: 220481705 - 220485566                                                                                                                                                  | 97.26                                              | 97.26 | 0 |

|     |     |        |        |       |                                                                                                                                                                                                                             |                                                                                        |       |   |
|-----|-----|--------|--------|-------|-----------------------------------------------------------------------------------------------------------------------------------------------------------------------------------------------------------------------------|----------------------------------------------------------------------------------------|-------|---|
| 766 | 11p | 111928 | 115175 | 3248  | 8p: 104622 - 108356<br>10q: 21274 - 18113<br>6p: 91944 - 95168<br>22q: 19684 - 16443<br>18p: 91554 - 95132<br>1q: 12559 - 9311<br>19q: 16701 - 13461<br>4q: 8783 - 6261<br>4p: 14618 - 17140<br>chr2: 114093933 - 114097169 | 97.39<br>93.85<br>92.86<br>97.31<br>94.40<br>92.80<br>97.01<br>94.16<br>94.01<br>96.95 | 95.07 | 0 |
| 767 | 11p | 111977 | 113607 | 1631  | 1p: 281741 - 283465<br>16q: 7077 - 5156<br>21q: 19448 - 18188                                                                                                                                                               | 96.57<br>95.38<br>96.13                                                                | 96.03 | 0 |
| 768 | 11p | 113532 | 115215 | 1684  | 2p: 4878 - 6570                                                                                                                                                                                                             | 92.1                                                                                   | 92.1  | 0 |
| 769 | 11p | 119534 | 136823 | 17290 | 17p: 727 - 29146                                                                                                                                                                                                            | 98.45                                                                                  | 98.45 | 0 |
| 770 | 11p | 259549 | 260712 | 1164  | chr7: 55790049 - 55790646<br>chr6: 29824853 - 29825369<br>chr12: 31790478 - 31791125                                                                                                                                        | 92.39<br>90.46<br>93.66                                                                | 92.17 | 0 |
| 771 | 11p | 259554 | 260747 | 1194  | chr4: 66787231 - 66787846                                                                                                                                                                                                   | 93.71                                                                                  | 93.71 | 0 |
| 772 | 11q | 85593  | 89518  | 3926  | chr18: 14893727 - 14897656                                                                                                                                                                                                  | 94.11                                                                                  | 94.11 | 0 |
| 773 | 11q | 89697  | 138789 | 49093 | chr18: 14925562 - 14971183                                                                                                                                                                                                  | 94.46                                                                                  | 94.46 | 0 |
| 774 | 12p | 1705   | 5645   | 3941  | 19p: 15718 - 19667<br>15q: 28282 - 24333                                                                                                                                                                                    | 96.76<br>96.76                                                                         | 96.76 | 0 |
| 775 | 12p | 1705   | 15597  | 13893 | chr2: 114039589 - 114052071<br>9p: 23892 - 37630                                                                                                                                                                            | 97.04<br>97.02                                                                         | 97.03 | 0 |
| 776 | 12p | 27892  | 42389  | 14498 | 20q: 18388 - 3777                                                                                                                                                                                                           | 97.74                                                                                  | 97.74 | 0 |
| 777 | 12q | 455241 | 456964 | 1724  | 20q: 444018 - 442754                                                                                                                                                                                                        | 90                                                                                     | 90    | 0 |
| 778 | 13q | 1374   | 15153  | 13780 | 2p: 2614 - 23214                                                                                                                                                                                                            | 91.57                                                                                  | 91.57 | 0 |
| 779 | 13q | 1375   | 10045  | 8671  | 4p: 7699 - 26903                                                                                                                                                                                                            | 91.55                                                                                  | 91.55 | 0 |
| 780 | 13q | 1401   | 4251   | 2851  | 1q: 13812 - 4693                                                                                                                                                                                                            | 92.14                                                                                  | 92.14 | 0 |
| 781 | 13q | 1734   | 5935   | 4202  | 6p: 94216 - 98867                                                                                                                                                                                                           | 91.25                                                                                  | 91.25 | 0 |
| 782 | 13q | 2102   | 7373   | 5272  | 4q: 13063 - 8663                                                                                                                                                                                                            | 92.33                                                                                  | 92.33 | 0 |
| 783 | 13q | 2108   | 11739  | 9632  | 5p: 2293 - 14897                                                                                                                                                                                                            | 91.38                                                                                  | 91.38 | 0 |
| 784 | 13q | 38599  | 62471  | 23873 | chr17: 16579782 - 16581890<br>chr17: 20209730 - 20211830                                                                                                                                                                    | 98.47<br>98.11                                                                         | 98.29 | 0 |
| 785 | 13q | 38603  | 57887  | 19285 | chr9: 99835472 - 99837034                                                                                                                                                                                                   | 92.41                                                                                  | 92.41 | 0 |
| 786 | 14q | 1555   | 5024   | 3470  | chr16: 33518166 - 33520701                                                                                                                                                                                                  | 90.22                                                                                  | 90.22 | 0 |
| 787 | 14q | 5215   | 6605   | 1391  | chr14: 105712752 - 105714137                                                                                                                                                                                                | 90                                                                                     | 90    | 1 |
| 788 | 14q | 17998  | 19246  | 1249  | chr1: 57461707 - 57462952                                                                                                                                                                                                   | 98.1                                                                                   | 98.1  | 0 |
| 789 | 14q | 68172  | 73035  | 4864  | chr16: 33526959 - 33531826                                                                                                                                                                                                  | 94.72                                                                                  | 94.72 | 0 |
| 790 | 14q | 89584  | 90661  | 1078  | chr14: 105816615 - 105817683                                                                                                                                                                                                | 90.14                                                                                  | 90.14 | 1 |
| 791 | 14q | 89938  | 106193 | 16256 | chr16: 33560842 - 33561564                                                                                                                                                                                                  | 91.65                                                                                  | 91.65 | 0 |
| 792 | 14q | 102384 | 104211 | 1828  | chr14: 105798183 - 105800773                                                                                                                                                                                                | 90                                                                                     | 90    | 1 |
| 793 | 14q | 104829 | 106216 | 1388  | chr14: 105785334 - 105786719                                                                                                                                                                                                | 93.18                                                                                  | 93.18 | 1 |
| 794 | 14q | 150416 | 152240 | 1825  | chr14: 105705643 - 105707206<br>chr21: 9882604 - 9884598                                                                                                                                                                    | 92.70<br>91.58                                                                         | 92.14 | 1 |
| 795 | 14q | 151099 | 152955 | 1857  | chr15: 18429899 - 18431719                                                                                                                                                                                                  | 90.73                                                                                  | 90.73 | 0 |
| 796 | 14q | 157413 | 158664 | 1252  | chr16: 33504106 - 33505367                                                                                                                                                                                                  | 91                                                                                     | 91    | 0 |
| 797 | 14q | 171502 | 173031 | 1530  | chr16: 31958693 - 31960767<br>chr16: 33563258 - 33565002<br>chr16: 31865447 - 31869175                                                                                                                                      | 91.64<br>91.00<br>91.48                                                                | 91.32 | 0 |
| 798 | 14q | 213296 | 217065 | 3770  | chr16: 32806991 - 32810721<br>chr16: 33661812 - 33665517                                                                                                                                                                    | 91.38<br>91.25                                                                         | 91.37 | 0 |
| 799 | 14q | 213296 | 214704 | 1409  | chr14: 105698396 - 105699947                                                                                                                                                                                                | 91.58                                                                                  | 91.58 | 1 |
| 800 | 14q | 214297 | 217071 | 2775  | chr16: 33518087 - 33520687                                                                                                                                                                                                  | 90.26                                                                                  | 90.26 | 0 |
| 801 | 14q | 221649 | 223489 | 1841  | chr15: 18438331 - 18440159<br>chr14: 105712888 - 105714706                                                                                                                                                                  | 90.00<br>90.00                                                                         | 90    | 1 |
| 802 | 14q | 239773 | 242810 | 3038  | chr16: 33504106 - 33506584                                                                                                                                                                                                  | 90.52                                                                                  | 90.52 | 0 |
| 803 | 14q | 290757 | 292740 | 1984  | chr16: 33496390 - 33498689                                                                                                                                                                                                  | 91.49                                                                                  | 91.49 | 0 |
| 804 | 14q | 295187 | 296429 | 1243  | chr14: 105588909 - 105590457<br>chr14: 105762490 - 105763545<br>chr16: 32920104 - 32921368<br>chr16: 33545878 - 33547142<br>chr16: 31977088 - 31978106                                                                      | 91.47<br>92.34<br>90.95<br>90.47<br>90.35                                              | 91.12 | 1 |

|     |     |        |        |        |                                                                                                                                                                                                                                                                                                           |                                                                                        |       |   |
|-----|-----|--------|--------|--------|-----------------------------------------------------------------------------------------------------------------------------------------------------------------------------------------------------------------------------------------------------------------------------------------------------------|----------------------------------------------------------------------------------------|-------|---|
| 805 | 14q | 317376 | 319579 | 2204   | chr16: 31965067 - 31967475<br>chr16: 33556533 - 33558953<br>chr14: 105652797 - 105655235<br>chr16: 32908522 - 32910710                                                                                                                                                                                    | 90.58<br>90.11<br>92.91<br>91.00                                                       | 91.15 | 1 |
| 806 | 14q | 322259 | 324671 | 2413   | chr15: 18428171 - 18430168                                                                                                                                                                                                                                                                                | 91.54                                                                                  | 91.54 | 0 |
| 807 | 14q | 324223 | 325491 | 1269   | chr14: 105607796 - 105609059                                                                                                                                                                                                                                                                              | 90                                                                                     | 90    | 1 |
| 808 | 14q | 360562 | 361821 | 1260   | chr2: 95060054 - 95061370                                                                                                                                                                                                                                                                                 | 91                                                                                     | 91    | 0 |
| 809 | 14q | 360571 | 370049 | 9479   | chr15: 18453235 - 18455979                                                                                                                                                                                                                                                                                | 92.43                                                                                  | 92.43 | 0 |
| 810 | 14q | 364239 | 366620 | 2382   | chr14: 105620163 - 105622561                                                                                                                                                                                                                                                                              | 90.09                                                                                  | 90.09 | 1 |
| 811 | 14q | 443538 | 444630 | 1093   | chr14: 105692521 - 105693618                                                                                                                                                                                                                                                                              | 93                                                                                     | 93    | 1 |
| 812 | 14q | 443764 | 455721 | 11958  | chr15: 18438652 - 18453387                                                                                                                                                                                                                                                                                | 90.38                                                                                  | 90.38 | 0 |
| 813 | 14q | 483496 | 484585 | 1090   | chr15: 19974033 - 19975119                                                                                                                                                                                                                                                                                | 91.73                                                                                  | 91.73 | 0 |
| 814 | 14q | 483496 | 484585 | 1090   | chr14: 105548902 - 105549981                                                                                                                                                                                                                                                                              | 92.1                                                                                   | 92.1  | 1 |
| 815 | 15q | 2004   | 10069  | 8066   | Xq: 10579 - 2524<br>16p: 1462 - 9529<br>Yq: 10579 - 2524                                                                                                                                                                                                                                                  | 97.76<br>97.79<br>97.76                                                                | 97.77 | 0 |
| 816 | 15q | 2007   | 28282  | 26276  | 9p: 1894 - 27840<br>chr2: 114048111 - 114074366                                                                                                                                                                                                                                                           | 98.39<br>97.93                                                                         | 98.16 | 0 |
| 817 | 15q | 8621   | 116787 | 108167 | 19p: 1 - 109077                                                                                                                                                                                                                                                                                           | 98.5                                                                                   | 98.5  | 0 |
| 818 | 15q | 24333  | 28282  | 3950   | 12p: 1705 - 5645                                                                                                                                                                                                                                                                                          | 96.89                                                                                  | 96.89 | 0 |
| 819 | 15q | 59048  | 116787 | 57740  | 6p: 1 - 58402                                                                                                                                                                                                                                                                                             | 98.06                                                                                  | 98.06 | 0 |
| 820 | 15q | 75329  | 116787 | 41459  | 1p: 70845 - 112213<br>8p: 37990 - 81761<br>6q: 117939 - 72955<br>5q: 122536 - 80764<br>11p: 1 - 39454                                                                                                                                                                                                     | 97.91<br>98.12<br>98.08<br>98.15<br>98.11                                              | 98.07 | 0 |
| 821 | 15q | 187268 | 199153 | 11886  | chr15: 98137309 - 98148859                                                                                                                                                                                                                                                                                | 96.46                                                                                  | 96.46 | 1 |
| 822 | 15q | 187385 | 194606 | 7222   | chr13: 91922051 - 91930591                                                                                                                                                                                                                                                                                | 92.11                                                                                  | 92.11 | 0 |
| 823 | 15q | 194717 | 202307 | 7591   | chr7: 30120820 - 30129014                                                                                                                                                                                                                                                                                 | 91.18                                                                                  | 91.18 | 0 |
| 824 | 15q | 194956 | 196153 | 1198   | chr15: 76796036 - 76797273                                                                                                                                                                                                                                                                                | 91.83                                                                                  | 91.83 | 1 |
| 825 | 15q | 196769 | 198171 | 1403   | chr15: 28868410 - 28870653<br>chr15: 80506706 - 80508296<br>chr15: 80893231 - 80894821<br>chr15: 82862061 - 82863651<br>chr15: 82730871 - 82732083<br>chr15: 76798290 - 76805545<br>chr5: 174276897 - 174277917<br>chr15: 73852798 - 73853994<br>chr15: 88633970 - 88635174<br>chr15: 76007224 - 76008425 | 91.92<br>92.16<br>92.16<br>91.61<br>91.44<br>91.56<br>90.25<br>90.59<br>91.20<br>90.30 | 91.32 | 1 |
| 826 | 15q | 196920 | 205593 | 8674   | chrY: 25934288 - 25940928<br>chrY: 24697760 - 24704400                                                                                                                                                                                                                                                    | 91.16<br>91.21                                                                         | 91.19 | 0 |
| 827 | 15q | 196938 | 215927 | 18990  | chr10: 30682692 - 30701934                                                                                                                                                                                                                                                                                | 90.91                                                                                  | 90.91 | 0 |
| 828 | 15q | 197828 | 200670 | 2843   | chrY: 24651121 - 24653928<br>chrY: 25984763 - 25987570                                                                                                                                                                                                                                                    | 91.89<br>91.89                                                                         | 91.89 | 0 |
| 829 | 15q | 199369 | 204239 | 4871   | chr15: 28871217 - 28876264                                                                                                                                                                                                                                                                                | 91.13                                                                                  | 91.13 | 1 |
| 830 | 15q | 199586 | 200748 | 1163   | chr15: 20807150 - 20808309<br>chr15: 28162918 - 28164076<br>chr15: 28215014 - 28216172<br>chr15: 28631942 - 28633098<br>chr15: 28683991 - 28685149<br>chr15: 30673416 - 30674572                                                                                                                          | 90.00<br>90.00<br>90.00<br>90.00<br>90.00<br>90.00                                     | 90    | 1 |

|                            |       |        |        |       |                            |       |       |   |
|----------------------------|-------|--------|--------|-------|----------------------------|-------|-------|---|
| 831                        | 15q   | 201248 | 204230 | 2983  | chr15: 19029385 - 19032731 | 90.89 | 90.82 | 1 |
|                            |       |        |        |       | chr15: 20988210 - 20991556 | 90.85 |       |   |
|                            |       |        |        |       | chr15: 21153007 - 21156349 | 90.78 |       |   |
|                            |       |        |        |       | chr15: 26299076 - 26302420 | 90.85 |       |   |
|                            |       |        |        |       | chr15: 20262047 - 20265393 | 90.90 |       |   |
|                            |       |        |        |       | chr15: 26572143 - 26575487 | 90.90 |       |   |
|                            |       |        |        |       | chr15: 30675435 - 30678238 | 90.59 |       |   |
|                            |       |        |        |       | chr15: 28686013 - 28688829 | 90.59 |       |   |
|                            |       |        |        |       | chr15: 32463988 - 32466749 | 91.07 |       |   |
|                            |       |        |        |       | chr15: 32610209 - 32612970 | 91.07 |       |   |
|                            |       |        |        |       | chr15: 28165012 - 28167753 | 91.01 |       |   |
|                            |       |        |        |       | chr15: 28634031 - 28636764 | 90.59 |       |   |
|                            |       |        |        |       | chr15: 28488465 - 28491200 | 90.59 |       |   |
|                            |       |        |        |       | chr15: 30477478 - 30480220 | 91.03 |       |   |
| chr15: 30520833 - 30523570 | 90.59 |        |        |       |                            |       |       |   |
| 832                        | 15q   | 201420 | 203000 | 1581  | chr15: 20809174 - 20810748 | 92.55 | 92.55 | 1 |
|                            |       |        |        |       | chr15: 26752549 - 26754121 | 92.55 |       |   |
| 833                        | 15q   | 201501 | 205611 | 4111  | chr15: 28217110 - 28221244 | 90.9  | 90.9  | 1 |
| 834                        | 15q   | 202975 | 204549 | 1575  | chr16: 51944569 - 51946166 | 90.59 | 90.59 | 0 |
| 835                        | 15q   | 205285 | 210741 | 5457  | chrY: 24655974 - 24660095  | 92.46 | 92.46 | 0 |
|                            |       |        |        |       | chrY: 25978596 - 25982717  | 92.46 |       |   |
| 836                        | 15q   | 205482 | 207296 | 1815  | chr15: 21157200 - 21159481 | 90.46 | 90.97 | 1 |
|                            |       |        |        |       | chr15: 26303271 - 26305558 | 90.46 |       |   |
|                            |       |        |        |       | chr15: 28168615 - 28170758 | 91.14 |       |   |
|                            |       |        |        |       | chr15: 28637626 - 28639759 | 90.42 |       |   |
|                            |       |        |        |       | chr15: 28689681 - 28691820 | 91.24 |       |   |
|                            |       |        |        |       | chr15: 28877114 - 28879256 | 90.96 |       |   |
|                            |       |        |        |       | chr15: 30679100 - 30681234 | 91.03 |       |   |
|                            |       |        |        |       | chr15: 20992795 - 20994669 | 92.07 |       |   |
|                            |       |        |        |       | chr15: 88636451 - 88637777 | 90.34 |       |   |
|                            |       |        |        |       | chr15: 26569006 - 26570361 | 90.72 |       |   |
|                            |       |        |        |       | chr15: 28485472 - 28486644 | 90.69 |       |   |
|                            |       |        |        |       | chr15: 30474484 - 30475654 | 91.39 |       |   |
|                            |       |        |        |       | chr15: 30526837 - 30528009 | 91.69 |       |   |
|                            |       |        |        |       | chr15: 19033582 - 19037186 | 91.18 |       |   |
| chr15: 20257572 - 20260266 | 90.93 |        |        |       |                            |       |       |   |
| 837                        | 15q   | 205543 | 208622 | 3080  | chr15: 98149130 - 98172164 | 96.82 | 91.06 | 1 |
| 838                        | 15q   | 207904 | 242877 | 34974 | chr15: 30683396 - 30686806 | 90.91 | 96.82 | 1 |
| 839                        | 15q   | 209356 | 212765 | 3410  | chr15: 32458883 - 32460979 | 91.04 | 91.33 | 1 |
|                            |       |        |        |       | chr15: 32605102 - 32607200 | 91.30 |       |   |
|                            |       |        |        |       | chr15: 19038003 - 19040161 | 91.95 |       |   |
|                            |       |        |        |       | chr15: 20996828 - 20998986 | 91.95 |       |   |
|                            |       |        |        |       | chr15: 26307729 - 26309887 | 91.58 |       |   |
|                            |       |        |        |       | chr15: 20254597 - 20256755 | 91.95 |       |   |
|                            |       |        |        |       | chr15: 26564677 - 26566835 | 91.07 |       |   |
|                            |       |        |        |       | chr15: 20816922 - 20819714 | 91.55 |       |   |
|                            |       |        |        |       | chr15: 21161647 - 21164438 | 91.56 |       |   |
|                            |       |        |        |       | chr15: 28172919 - 28175710 | 91.46 |       |   |
|                            |       |        |        |       | chr15: 28224987 - 28227778 | 91.52 |       |   |
|                            |       |        |        |       | chr15: 26743427 - 26746216 | 91.56 |       |   |
|                            |       |        |        |       | chr15: 28480522 - 28483310 | 91.12 |       |   |
|                            |       |        |        |       | chr15: 30469559 - 30472350 | 91.52 |       |   |
|                            |       |        |        |       | chr15: 30521723 - 30524674 | 91.07 |       |   |
|                            |       |        |        |       | chr15: 28641921 - 28644874 | 91.07 |       |   |
|                            |       |        |        |       | chr15: 28693981 - 28696937 | 91.39 |       |   |
|                            |       |        |        |       | chr15: 88640040 - 88641226 | 90.33 |       |   |
|                            |       |        |        |       | chr15: 70746041 - 70747120 | 91.00 |       |   |
|                            |       |        |        |       | chr15: 73349895 - 73350972 | 91.00 |       |   |
|                            |       |        |        |       | chr15: 72148922 - 72149999 |       |       |   |

|     |     |        |        |       |                                                                                                                                                                                                                                                                                                                                                                                                    |                                                                                                                   |       |   |
|-----|-----|--------|--------|-------|----------------------------------------------------------------------------------------------------------------------------------------------------------------------------------------------------------------------------------------------------------------------------------------------------------------------------------------------------------------------------------------------------|-------------------------------------------------------------------------------------------------------------------|-------|---|
| 842 | 15q | 212903 | 214599 | 1697  | chr15: 32602604 - 32605056<br>chr15: 28176532 - 28178043<br>chr15: 28645530 - 28647040<br>chr15: 28478195 - 28479706<br>chr15: 30519551 - 30521065<br>chr15: 30466904 - 30468742<br>chr15: 28228917 - 28230435                                                                                                                                                                                     | 90.31<br>90.00<br>90.00<br>90.00<br>90.00<br>90.87<br>90.84                                                       | 90.29 | 1 |
| 843 | 15q | 213931 | 215516 | 1586  | chr22: 41507667 - 41509055                                                                                                                                                                                                                                                                                                                                                                         | 91.87                                                                                                             | 91.87 | 0 |
| 844 | 15q | 214553 | 229500 | 14948 | chr9: 128086775 - 128092943                                                                                                                                                                                                                                                                                                                                                                        | 90                                                                                                                | 90    | 0 |
| 845 | 15q | 229301 | 233364 | 4064  | chr15: 32595687 - 32600446                                                                                                                                                                                                                                                                                                                                                                         | 92.4                                                                                                              | 92.4  | 1 |
| 846 | 15q | 233166 | 234260 | 1095  | chr15: 82630934 - 82632099<br>chr15: 80799801 - 80800970<br>chr15: 82768162 - 82769333<br>chr15: 82845450 - 82846616<br>chr15: 32594623 - 32595648                                                                                                                                                                                                                                                 | 90.27<br>90.27<br>90.27<br>90.27<br>91.48                                                                         | 90.51 | 1 |
| 847 | 15q | 233655 | 239471 | 5817  | chrY: 25947578 - 25952655<br>chrY: 24686029 - 24691110                                                                                                                                                                                                                                                                                                                                             | 91.43<br>91.45                                                                                                    | 91.44 | 0 |
| 848 | 15q | 237263 | 238999 | 1737  | chr15: 32590595 - 32592832<br>chr15: 82634169 - 82636141<br>chr15: 80451324 - 80462817<br>chr15: 80837868 - 80849351<br>chr15: 82671190 - 82683825<br>chr15: 83560288 - 83572931<br>chr15: 82841389 - 82843394<br>chr15: 82708569 - 82710578<br>chr15: 80526976 - 80528244<br>chr15: 80913507 - 80914775<br>chr15: 82911466 - 82912770<br>chr15: 80795775 - 80797035<br>chr15: 82764130 - 82765390 | 91.29<br>91.79<br>91.73<br>91.64<br>91.40<br>91.40<br>91.24<br>91.51<br>92.18<br>92.18<br>92.12<br>92.04<br>92.16 | 91.74 | 1 |
| 849 | 15q | 237702 | 248990 | 11289 | chrY: 25909036 - 25921556<br>chrY: 24717131 - 24729651                                                                                                                                                                                                                                                                                                                                             | 92.02<br>91.96                                                                                                    | 91.99 | 0 |
| 850 | 15q | 239350 | 242355 | 3006  | chr15: 82710941 - 82714269<br>chr15: 82907741 - 82911078<br>chr15: 82636529 - 82640276<br>chr15: 80791676 - 80795389<br>chr15: 82837278 - 82841026                                                                                                                                                                                                                                                 | 92.97<br>92.30<br>91.46<br>91.62<br>91.46                                                                         | 91.96 | 1 |
| 851 | 15q | 241976 | 244363 | 2388  | chrY: 25955573 - 25958256<br>chrY: 24680429 - 24683110                                                                                                                                                                                                                                                                                                                                             | 93.67<br>93.67                                                                                                    | 93.67 | 0 |
| 852 | 15q | 243592 | 247141 | 3550  | chr15: 82715442 - 82719227                                                                                                                                                                                                                                                                                                                                                                         | 91.23                                                                                                             | 91.23 | 1 |
| 853 | 15q | 247466 | 248990 | 1525  | chr15: 80467769 - 80471182<br>chr15: 80854303 - 80857717<br>chr15: 82899233 - 82900478                                                                                                                                                                                                                                                                                                             | 90.59<br>90.28<br>90.43                                                                                           | 90.43 | 1 |
| 854 | 15q | 473217 | 475124 | 1908  | chr9: 11773481 - 11775112                                                                                                                                                                                                                                                                                                                                                                          | 92.61                                                                                                             | 92.61 | 0 |
| 855 | 16p | 1462   | 28780  | 27319 | Xq: 29837 - 2524<br>Yq: 29837 - 2524                                                                                                                                                                                                                                                                                                                                                               | 96.97<br>96.97                                                                                                    | 96.97 | 0 |
| 856 | 16p | 1464   | 9529   | 8066  | 15q: 10069 - 2004<br>9p: 1894 - 9953<br>chr2: 114066302 - 114074366                                                                                                                                                                                                                                                                                                                                | 97.79<br>98.08<br>98.13                                                                                           | 98    | 0 |
| 857 | 16p | 8082   | 9529   | 1448  | 19p: 1 - 1448                                                                                                                                                                                                                                                                                                                                                                                      | 98                                                                                                                | 98    | 0 |
| 858 | 16p | 17959  | 29051  | 11093 | 10p: 64762 - 74445                                                                                                                                                                                                                                                                                                                                                                                 | 92.38                                                                                                             | 92.38 | 0 |
| 859 | 16p | 17959  | 37573  | 19615 | 9q: 129597 - 113409<br>18p: 68156 - 84342                                                                                                                                                                                                                                                                                                                                                          | 91.98<br>92.31                                                                                                    | 92.15 | 0 |
| 860 | 16p | 48123  | 52702  | 4580  | chr3: 14589148 - 14591139                                                                                                                                                                                                                                                                                                                                                                          | 91.94                                                                                                             | 91.94 | 0 |
| 861 | 16q | 1705   | 13032  | 11328 | 17q: 19918 - 14511<br>5q: 15432 - 10026<br>6q: 9611 - 4197                                                                                                                                                                                                                                                                                                                                         | 96.51<br>96.27<br>96.72                                                                                           | 96.5  | 0 |
| 862 | 16q | 1705   | 5031   | 3327  | 19p: 196020 - 199397                                                                                                                                                                                                                                                                                                                                                                               | 93.59                                                                                                             | 93.59 | 0 |
| 863 | 16q | 1705   | 3756   | 2052  | 5p: 618 - 2291                                                                                                                                                                                                                                                                                                                                                                                     | 94.00                                                                                                             | 93.82 | 0 |
|     |     |        |        |       | 4q: 7430 - 2781                                                                                                                                                                                                                                                                                                                                                                                    |                                                                                                                   |       |   |



|     |     |       |        |       |                                                                                                                                                                                |                                                                      |       |   |
|-----|-----|-------|--------|-------|--------------------------------------------------------------------------------------------------------------------------------------------------------------------------------|----------------------------------------------------------------------|-------|---|
| 865 | 16q | 1827  | 7774   | 5948  | chr2: 114090474 - 114096529<br>19q: 16059 - 10016<br>22q: 19042 - 13006<br>1q: 11916 - 7032<br>4p: 11143 - 16488<br>18p: 88797 - 94488                                         | 94.03<br>94.22<br>93.97<br>93.07<br>92.61<br>93.45                   | 93.56 | 0 |
| 866 | 16q | 5038  | 7399   | 2362  | 1p: 281205 - 283465<br>6p: 91533 - 94526<br>19p: 182231 - 184131<br>3q: 59632 - 57730<br>11p: 111977 - 113879<br>9q: 24868 - 22273<br>7p: 71845 - 74440<br>8p: 105117 - 107714 | 95.08<br>92.95<br>95.40<br>95.01<br>95.01<br>95.10<br>95.32<br>94.95 | 94.85 | 0 |
| 867 | 16q | 5897  | 7770   | 1874  | 2p: 4068 - 5924                                                                                                                                                                | 91.53                                                                | 91.53 | 0 |
| 868 | 16q | 13817 | 57598  | 43782 | chrY: 24760333 - 24810244<br>chrY: 25828452 - 25878360                                                                                                                         | 96.04<br>96.05                                                       | 96.05 | 0 |
| 869 | 16q | 13817 | 30416  | 16600 | chr1: 239500425 - 239517107                                                                                                                                                    | 96.79                                                                | 96.79 | 0 |
| 870 | 16q | 13817 | 23961  | 10145 | 5q: 72329 - 62109<br>8p: 19652 - 29862<br>1p: 52507 - 62722<br>6q: 64494 - 54277                                                                                               | 97.74<br>97.57<br>97.70<br>97.74                                     | 97.69 | 0 |
| 871 | 16q | 13817 | 19869  | 6053  | chr4: 119695468 - 119701610                                                                                                                                                    | 97.38                                                                | 97.38 | 0 |
| 872 | 16q | 13817 | 14928  | 1112  | chr1: 220402740 - 220403853                                                                                                                                                    | 97.36                                                                | 97.36 | 0 |
| 873 | 16q | 15778 | 52766  | 36989 | 2q: 37420 - 79                                                                                                                                                                 | 97.64                                                                | 97.64 | 0 |
| 874 | 16q | 15806 | 36468  | 20663 | chr1: 220404716 - 220425495                                                                                                                                                    | 97.88                                                                | 97.88 | 0 |
| 875 | 16q | 19873 | 56395  | 36523 | chr4: 119912346 - 119948842                                                                                                                                                    | 96.99                                                                | 96.99 | 0 |
| 876 | 16q | 26485 | 57598  | 31114 | chr10: 38775755 - 38806807                                                                                                                                                     | 96.58                                                                | 96.58 | 0 |
| 877 | 16q | 27493 | 47361  | 19869 | chr4: 165537042 - 165556842                                                                                                                                                    | 95.66                                                                | 95.66 | 0 |
| 878 | 16q | 30092 | 64320  | 34229 | 20q: 46227 - 18783                                                                                                                                                             | 97.43                                                                | 97.43 | 0 |
| 879 | 16q | 30356 | 57598  | 27243 | 7p: 91 - 27604<br>chr1: 239517108 - 239544133                                                                                                                                  | 98.38<br>96.91                                                       | 97.64 | 0 |
| 880 | 16q | 32910 | 64320  | 31411 | 6p: 62675 - 87328                                                                                                                                                              | 97.58                                                                | 97.58 | 0 |
| 881 | 16q | 32910 | 57598  | 24689 | 19p: 113350 - 138324<br>5q: 151484 - 126807<br>11p: 43725 - 68406                                                                                                              | 98.19<br>98.57<br>98.18                                              | 98.31 | 0 |
| 882 | 16q | 32910 | 50788  | 17879 | 8p: 86034 - 103892                                                                                                                                                             | 97.66                                                                | 97.66 | 0 |
| 883 | 16q | 32910 | 43951  | 11042 | 6q: 133270 - 122211                                                                                                                                                            | 98.12                                                                | 98.12 | 0 |
| 884 | 16q | 32910 | 36468  | 3559  | 1p: 116486 - 120044                                                                                                                                                            | 97.92                                                                | 97.92 | 0 |
| 885 | 16q | 36614 | 56395  | 19782 | chr1: 220425641 - 220445916                                                                                                                                                    | 96.91                                                                | 96.91 | 0 |
| 886 | 16q | 36614 | 37793  | 1180  | 1p: 120190 - 121369                                                                                                                                                            | 98.33                                                                | 98.33 | 0 |
| 887 | 16q | 41363 | 57598  | 16236 | 1p: 124946 - 141190                                                                                                                                                            | 98.43                                                                | 98.43 | 0 |
| 888 | 16q | 42548 | 44495  | 1948  | chr1: 224457827 - 224459772                                                                                                                                                    | 96.91                                                                | 96.91 | 0 |
| 889 | 16q | 43247 | 57598  | 14352 | 3q: 14339 - 1                                                                                                                                                                  | 98.77                                                                | 98.77 | 0 |
| 890 | 16q | 44840 | 57598  | 12759 | chr1: 224467506 - 224480262                                                                                                                                                    | 96.67                                                                | 96.67 | 0 |
| 891 | 16q | 48412 | 50258  | 1847  | chr7: 61805021 - 61806472<br>chr1: 193837523 - 193839718                                                                                                                       | 91.98<br>92.15                                                       | 92.06 | 0 |
| 892 | 16q | 48423 | 57415  | 8993  | chr7: 55985248 - 55994150<br>chr7: 45409991 - 45420987                                                                                                                         | 94.69<br>94.60                                                       | 94.64 | 0 |
| 893 | 16q | 48424 | 53289  | 4866  | chr7: 55420849 - 55425758                                                                                                                                                      | 91.35                                                                | 91.35 | 0 |
| 894 | 16q | 52440 | 57598  | 5159  | chr7: 127672739 - 127677904                                                                                                                                                    | 96.4                                                                 | 96.4  | 0 |
| 895 | 16q | 52457 | 56847  | 4391  | chr7: 62456759 - 62460740<br>chr7: 56432166 - 56436149<br>chr7: 39391514 - 39396354<br>chr7: 55363641 - 55368463<br>chr1: 219029846 - 219033728<br>chr7: 51009264 - 51014002   | 94.27<br>94.10<br>93.54<br>94.12<br>96.93<br>94.19                   | 94.52 | 0 |
| 896 | 16q | 53721 | 56391  | 2671  | chr4: 120680507 - 120683166                                                                                                                                                    | 94.69                                                                | 94.69 | 0 |
| 897 | 16q | 62611 | 131365 | 68755 | 3q: 87591 - 17517<br>7p: 31783 - 101860                                                                                                                                        | 98.27<br>98.54                                                       | 98.41 | 0 |
| 898 | 16q | 62611 | 119454 | 56844 | 11p: 71805 - 128459                                                                                                                                                            | 98.42                                                                | 98.42 | 0 |
| 899 | 16q | 62611 | 105868 | 43258 | 19p: 142094 - 185461                                                                                                                                                           | 98.5                                                                 | 98.5  | 0 |
| 900 | 16q | 62611 | 96795  | 34185 | 5q: 189359 - 154639                                                                                                                                                            | 98.22                                                                | 98.22 | 0 |
| 901 | 16q | 62611 | 70142  | 7532  | 1p: 151063 - 158591                                                                                                                                                            | 98.44                                                                | 98.44 | 0 |

|     |     |        |        |       |                                                                                                                                                                                                                                                                                                             |                                                                                        |       |   |
|-----|-----|--------|--------|-------|-------------------------------------------------------------------------------------------------------------------------------------------------------------------------------------------------------------------------------------------------------------------------------------------------------------|----------------------------------------------------------------------------------------|-------|---|
| 902 | 16q | 62611  | 66298  | 3688  | 1p: 144248 - 147924<br>1p: 147657 - 151331                                                                                                                                                                                                                                                                  | 98.57<br>98.05                                                                         | 98.31 | 0 |
| 903 | 16q | 62612  | 63909  | 1298  | chr7: 45403637 - 45404932<br>chr1: 224460233 - 224461546<br>chr7: 51020104 - 51021398                                                                                                                                                                                                                       | 96.38<br>95.07<br>95.75                                                                | 95.73 | 0 |
| 904 | 16q | 62613  | 65222  | 2610  | chr4: 119904851 - 119907443<br>chr4: 120688005 - 120690600<br>chr10: 38769794 - 38772390<br>chr7: 39386597 - 39389187<br>chr7: 127667204 - 127669796<br>chr7: 55375429 - 55378337<br>chr7: 56005902 - 56008498<br>chr1: 219039323 - 219041921<br>chr1: 239547046 - 239549639<br>chr1: 220447184 - 220449733 | 96.33<br>96.08<br>96.70<br>95.95<br>97.89<br>96.62<br>96.56<br>96.63<br>97.34<br>98.06 | 96.82 | 0 |
| 905 | 16q | 66125  | 68934  | 2810  | chr7: 56015725 - 56026447                                                                                                                                                                                                                                                                                   | 90.67                                                                                  | 90.67 | 0 |
| 906 | 16q | 68404  | 100242 | 31839 | chr1: 219047352 - 219081989<br>chr10: 38729667 - 38764372                                                                                                                                                                                                                                                   | 97.26<br>96.86                                                                         | 97.26 | 0 |
| 907 | 16q | 68407  | 102624 | 34218 | chr4: 119870679 - 119899413<br>chr4: 120696041 - 120730560<br>chr1: 239555083 - 239589627                                                                                                                                                                                                                   | 97.28<br>96.34<br>97.48                                                                | 96.99 | 0 |
| 908 | 16q | 68409  | 94345  | 25937 | chr1: 220455168 - 220481396                                                                                                                                                                                                                                                                                 | 97.57                                                                                  | 97.57 | 0 |
| 909 | 16q | 68409  | 89625  | 21217 | chr7: 39360178 - 39381110                                                                                                                                                                                                                                                                                   | 92.88                                                                                  | 92.88 | 0 |
| 910 | 16q | 68409  | 70142  | 1734  | chr7: 127660030 - 127661758                                                                                                                                                                                                                                                                                 | 94.82                                                                                  | 94.82 | 0 |
| 911 | 16q | 68411  | 82585  | 14175 | chr7: 56013907 - 56027313                                                                                                                                                                                                                                                                                   | 92.43                                                                                  | 92.43 | 0 |
| 912 | 16q | 68433  | 72644  | 4212  | chr7: 45392682 - 45396890                                                                                                                                                                                                                                                                                   | 95.86                                                                                  | 95.86 | 0 |
| 913 | 16q | 69778  | 75519  | 5742  | chr7: 62412186 - 62417768<br>chr7: 56475714 - 56481294<br>chr7: 51029490 - 51036010                                                                                                                                                                                                                         | 90.73<br>90.73<br>92.87                                                                | 91.44 | 0 |
| 914 | 16q | 69778  | 72644  | 2867  | chr7: 55385064 - 55388239                                                                                                                                                                                                                                                                                   | 93.03                                                                                  | 93.03 | 0 |
| 915 | 16q | 72392  | 102624 | 30233 | 1p: 160844 - 191186                                                                                                                                                                                                                                                                                         | 98.33                                                                                  | 98.33 | 0 |
| 916 | 16q | 72392  | 84501  | 12110 | chr7: 127645453 - 127657799                                                                                                                                                                                                                                                                                 | 96.24                                                                                  | 96.24 | 0 |
| 917 | 16q | 72392  | 81719  | 9328  | chr7: 65587537 - 65593232                                                                                                                                                                                                                                                                                   | 91.29                                                                                  | 91.29 | 0 |
| 918 | 16q | 72392  | 75264  | 2873  | chr11: 50000552 - 50003428<br>chr7: 64516409 - 64519292                                                                                                                                                                                                                                                     | 90.00<br>91.46                                                                         | 90.73 | 0 |
| 919 | 16q | 75881  | 81420  | 5540  | chr7: 64511343 - 64515807                                                                                                                                                                                                                                                                                   | 90.86                                                                                  | 90.86 | 0 |
| 920 | 16q | 81201  | 131367 | 50167 | 9q: 51184 - 834                                                                                                                                                                                                                                                                                             | 98.62                                                                                  | 98.62 | 0 |
| 921 | 16q | 81485  | 102624 | 21140 | chr7: 45368447 - 45389874                                                                                                                                                                                                                                                                                   | 96.36                                                                                  | 96.36 | 0 |
| 922 | 16q | 83754  | 85220  | 1467  | chr7: 64507178 - 64508843                                                                                                                                                                                                                                                                                   | 92.35                                                                                  | 92.35 | 0 |
| 923 | 16q | 84238  | 89681  | 5444  | chr7: 56029594 - 56035175                                                                                                                                                                                                                                                                                   | 92.72                                                                                  | 92.72 | 0 |
| 924 | 16q | 85455  | 86845  | 1391  | chr7: 65561411 - 65562799                                                                                                                                                                                                                                                                                   | 90.72                                                                                  | 90.72 | 0 |
| 925 | 16q | 90566  | 91685  | 1120  | chr7: 56036051 - 56037182                                                                                                                                                                                                                                                                                   | 92.33                                                                                  | 92.33 | 0 |
| 926 | 16q | 91646  | 100242 | 8597  | chr7: 127636388 - 127644996                                                                                                                                                                                                                                                                                 | 95.54                                                                                  | 95.54 | 0 |
| 927 | 16q | 94211  | 95696  | 1486  | chr7: 75222310 - 75223815<br>chr7: 65540950 - 65542445                                                                                                                                                                                                                                                      | 92.31<br>94.03                                                                         | 93.17 | 0 |
| 928 | 16q | 96620  | 102624 | 6005  | chr11: 50209890 - 50211062                                                                                                                                                                                                                                                                                  | 90                                                                                     | 90    | 0 |
| 929 | 16q | 97194  | 98396  | 1203  | chr7: 63775170 - 63776243<br>chr7: 64469009 - 64470133                                                                                                                                                                                                                                                      | 90.25<br>90.32                                                                         | 90.28 | 0 |
| 930 | 16q | 98838  | 102624 | 3787  | chr1: 220481705 - 220485566                                                                                                                                                                                                                                                                                 | 97.22                                                                                  | 97.22 | 0 |
| 931 | 16q | 102588 | 105715 | 3128  | 8p: 104622 - 108356<br>10q: 21274 - 18113<br>18p: 91554 - 94731<br>1q: 12159 - 9311<br>6p: 91944 - 94769<br>19q: 16701 - 13461<br>22q: 19684 - 16443<br>chr2: 114093933 - 114097169<br>4q: 8783 - 6261<br>4p: 14618 - 17140                                                                                 | 97.34<br>93.87<br>94.70<br>93.14<br>93.07<br>96.79<br>97.11<br>97.04<br>94.27<br>94.27 | 95.16 | 0 |
|     |     |        |        |       | 21q: 19448 - 18188                                                                                                                                                                                                                                                                                          |                                                                                        |       |   |

|     |     |        |        |       |                                                                                                                                               |                                                    |       |   |
|-----|-----|--------|--------|-------|-----------------------------------------------------------------------------------------------------------------------------------------------|----------------------------------------------------|-------|---|
| 935 | 16q | 131390 | 145989 | 14600 | 9q: 108513 - 80928<br>10p: 32239 - 59811<br>18p: 36632 - 63394                                                                                | 95.40<br>94.97<br>95.73                            | 95.37 | 0 |
| 936 | 16q | 131398 | 133440 | 2043  | 4q: 123167 - 121031<br>1p: 286972 - 289118                                                                                                    | 93.70<br>92.74                                     | 93.22 | 0 |
| 937 | 16q | 131430 | 138853 | 7424  | 3q: 119439 - 113998<br>chr12: 36865089 - 36876210<br>chr12: 34199947 - 34211062                                                               | 94.43<br>90.88<br>91.90                            | 92.4  | 0 |
| 938 | 16q | 133608 | 138299 | 4692  | 4q: 121040 - 109513<br>chr1: 223993648 - 224001048                                                                                            | 92.66<br>90.56                                     | 91.61 | 0 |
| 939 | 16q | 137312 | 138848 | 1537  | chr3: 75834770 - 75836658<br>chrY: 10552604 - 10554424<br>chrY: 18929039 - 18930242<br>chrY: 18075794 - 18076997                              | 90.47<br>91.38<br>90.00<br>90.00                   | 90.46 | 0 |
| 940 | 16q | 149733 | 171180 | 21448 | chr5: 23540912 - 23563027                                                                                                                     | 93.82                                              | 93.82 | 0 |
| 941 | 16q | 260295 | 278932 | 18638 | chr17: 20447480 - 20450998                                                                                                                    | 94.73                                              | 94.73 | 0 |
| 942 | 16q | 292277 | 295725 | 3449  | chr6: 90066806 - 90068310                                                                                                                     | 90.79                                              | 90.79 | 0 |
| 943 | 16q | 292549 | 293561 | 1013  | chr19: 6446216 - 6447222<br>chr6: 3097672 - 3098689                                                                                           | 92.00<br>91.00                                     | 91.5  | 0 |
| 944 | 16q | 292551 | 293568 | 1018  | chr6: 3168560 - 3169577                                                                                                                       | 92                                                 | 92    | 0 |
| 945 | 17p | 727    | 18220  | 17494 | 7p: 78903 - 88088<br>3q: 73851 - 65850<br>9q: 37610 - 29318<br>16q: 117597 - 109676                                                           | 97.52<br>97.23<br>97.52<br>97.52                   | 97.45 | 0 |
| 946 | 17p | 727    | 29146  | 28420 | 11p: 119534 - 136823                                                                                                                          | 98.46                                              | 98.46 | 0 |
| 947 | 17q | 3110   | 36125  | 33016 | 5q: 32068 - 1037                                                                                                                              | 98.75                                              | 98.75 | 0 |
| 948 | 17q | 3110   | 17406  | 14297 | chr2: 114079703 - 114093488<br>22q: 16000 - 2133<br>10q: 17677 - 3829<br>21q: 17747 - 4338<br>19p: 189683 - 199081<br>8p: 112649 - 123045     | 95.87<br>95.90<br>95.43<br>96.10<br>95.88<br>94.76 | 95.66 | 0 |
| 949 | 17q | 4319   | 17504  | 13186 | 19q: 13018 - 639                                                                                                                              | 95.82                                              | 95.82 | 0 |
| 950 | 17q | 8455   | 16452  | 7998  | 1q: 8975 - 1764                                                                                                                               | 95.61                                              | 95.61 | 0 |
| 951 | 17q | 8455   | 12292  | 3838  | chr3: 75756447 - 75760281                                                                                                                     | 93.52                                              | 93.52 | 0 |
| 952 | 17q | 8545   | 43948  | 35404 | 6q: 33611 - 1                                                                                                                                 | 98.25                                              | 98.25 | 0 |
| 953 | 17q | 12166  | 17506  | 5341  | 4p: 7719 - 14175                                                                                                                              | 92.28                                              | 92.28 | 0 |
| 954 | 17q | 14511  | 19918  | 5408  | 16q: 13032 - 1705                                                                                                                             | 97.01                                              | 97.01 | 0 |
| 955 | 17q | 14511  | 16179  | 1669  | 5p: 618 - 2291                                                                                                                                | 94.7                                               | 94.7  | 0 |
| 956 | 17q | 14875  | 17506  | 2632  | 4q: 5818 - 2781<br>18p: 88797 - 91117                                                                                                         | 92.10<br>93.44                                     | 92.77 | 0 |
| 957 | 17q | 19570  | 36125  | 16556 | 1p: 1 - 15016                                                                                                                                 | 97.97                                              | 97.97 | 0 |
| 958 | 17q | 36022  | 43948  | 7927  | 1p: 15044 - 25292<br>5q: 41588 - 32148                                                                                                        | 98.00<br>98.56                                     | 98.28 | 0 |
| 959 | 17q | 125910 | 128514 | 2605  | chr8: 86742308 - 86747680<br>chr8: 86860045 - 86865693<br>chr8: 86872236 - 86877884<br>chr8: 86884426 - 86889798<br>chr8: 86896340 - 86901988 | 98.41<br>98.20<br>97.90<br>97.90<br>98.41          | 98.16 | 0 |
| 960 | 17q | 125910 | 126941 | 1032  | chr8: 86754222 - 86758297                                                                                                                     | 98.29                                              | 98.29 | 0 |
| 961 | 17q | 126802 | 128514 | 1713  | chr8: 86851789 - 86853502                                                                                                                     | 96.23                                              | 96.23 | 0 |
| 962 | 18p | 1159   | 2971   | 1813  | chr2: 132391011 - 132392834<br>chr22: 14840436 - 14842245<br>chr14: 18429691 - 18431501                                                       | 92.18<br>91.20<br>91.20                            | 91.53 | 0 |
| 963 | 18p | 1669   | 6849   | 5181  | 1p: 283791 - 286519                                                                                                                           | 93.24                                              | 93.24 | 0 |
| 964 | 18p | 3342   | 15324  | 11983 | chr1: 224019203 - 224035343                                                                                                                   | 91.13                                              | 91.13 | 0 |
| 965 | 18p | 3342   | 44090  | 40749 | chr12: 34145401 - 34211062                                                                                                                    | 91.07                                              | 91.07 | 0 |
| 966 | 18p | 3866   | 7707   | 3842  | chr2: 132394175 - 132398023<br>chr22: 14843625 - 14847482<br>chr14: 18424456 - 18428301                                                       | 94.20<br>93.77<br>93.94                            | 93.97 | 0 |
| 967 | 18p | 4415   | 79293  | 74879 | 10p: 1 - 74443                                                                                                                                | 96.24                                              | 96.24 | 0 |
| 968 | 18p | 14978  | 22991  | 8014  | chrY: 18957030 - 18965446                                                                                                                     | 90.99                                              | 90.99 | 0 |
| 969 | 18p | 14978  | 35863  | 20886 | chrY: 18040585 - 18065337                                                                                                                     | 90.91                                              | 90.91 | 0 |
| 970 | 18p | 15346  | 44090  | 28745 | 3q: 119439 - 99337                                                                                                                            | 95.12                                              | 95.12 | 0 |
| 971 | 18p | 15346  | 66163  | 50818 | 9q: 111417 - 63045                                                                                                                            | 95.48                                              | 95.48 | 0 |

|      |     |        |        |        |                                                                                                                                                         |                                                             |       |   |
|------|-----|--------|--------|--------|---------------------------------------------------------------------------------------------------------------------------------------------------------|-------------------------------------------------------------|-------|---|
| 972  | 18p | 17567  | 38676  | 21110  | 1p: 286972 - 301421                                                                                                                                     | 93.47                                                       | 93.47 | 0 |
| 973  | 18p | 22287  | 23484  | 1198   | chrY: 10567257 - 10568441                                                                                                                               | 91.33                                                       | 91.33 | 0 |
| 974  | 18p | 33215  | 38676  | 5462   | 4q: 126874 - 121031                                                                                                                                     | 93.48                                                       | 93.48 | 0 |
| 975  | 18p | 33905  | 35863  | 1959   | chrY: 18940699 - 18942639                                                                                                                               | 90                                                          | 90    | 0 |
| 976  | 18p | 36956  | 44089  | 7134   | 16q: 138858 - 131398<br>chr12: 36865089 - 36875578                                                                                                      | 95.83<br>90.74                                              | 93.28 | 0 |
| 977  | 18p | 38560  | 43990  | 5431   | 4q: 121040 - 109513                                                                                                                                     | 92.98                                                       | 92.98 | 0 |
| 978  | 18p | 42541  | 44089  | 1549   | chrY: 10552604 - 10554424<br>chr3: 75834770 - 75835986                                                                                                  | 90.44<br>90.72                                              | 90.58 | 0 |
| 979  | 18p | 62317  | 63700  | 1384   | Xq: 16188 - 15056<br>Yq: 16188 - 15056                                                                                                                  | 90.00<br>90.00                                              | 90    | 0 |
| 980  | 18p | 68156  | 79029  | 10874  | Xq: 29838 - 19014<br>Yq: 29838 - 19014                                                                                                                  | 92.75<br>92.75                                              | 92.75 | 0 |
| 981  | 18p | 68156  | 84342  | 16187  | 16p: 17959 - 37573                                                                                                                                      | 92.34                                                       | 92.34 | 0 |
| 982  | 18p | 68156  | 87912  | 19757  | 9q: 133085 - 113409                                                                                                                                     | 97.59                                                       | 97.59 | 0 |
| 983  | 18p | 88797  | 91058  | 2262   | 8p: 121350 - 123046<br>17q: 17506 - 15235<br>6q: 7195 - 4927<br>5q: 13021 - 10750<br>19p: 196746 - 199397                                               | 93.94<br>93.44<br>93.28<br>93.44<br>93.32                   | 93.48 | 0 |
| 984  | 18p | 88797  | 92815  | 4019   | 21q: 19448 - 15450                                                                                                                                      | 93.54                                                       | 93.54 | 0 |
| 985  | 18p | 88797  | 95052  | 6256   | 16q: 7774 - 2435<br>chr2: 114091199 - 114097183<br>19q: 16715 - 10741<br>4p: 11867 - 17154<br>1q: 12573 - 7757<br>22q: 19698 - 13731<br>5p: 1348 - 2421 | 93.74<br>93.93<br>94.02<br>92.96<br>92.37<br>93.61<br>91.99 | 93.23 | 0 |
| 986  | 18p | 88797  | 102436 | 13640  | 10q: 26302 - 15394<br>4q: 15653 - 3505                                                                                                                  | 95.92<br>93.65                                              | 94.78 | 0 |
| 987  | 18p | 91285  | 93377  | 2093   | 1p: 281205 - 283465<br>16q: 104535 - 102637                                                                                                             | 94.44<br>94.68                                              | 94.56 | 0 |
| 988  | 18p | 91495  | 94967  | 3473   | 6p: 91533 - 94769<br>19p: 182231 - 185064<br>3q: 60982 - 57730<br>9q: 25525 - 22273<br>11p: 111977 - 115229<br>7p: 71845 - 75097<br>8p: 105117 - 107957 | 92.31<br>94.43<br>94.38<br>94.34<br>94.24<br>94.34<br>94.66 | 94.1  | 0 |
| 989  | 18p | 93350  | 94731  | 1382   | 2p: 5103 - 6171                                                                                                                                         | 92.46                                                       | 92.46 | 0 |
| 990  | 18p | 102640 | 118325 | 15686  | chr18: 16777494 - 16793498                                                                                                                              | 97.27                                                       | 97.27 | 1 |
| 991  | 19p | 1      | 1448   | 1448   | 16p: 8082 - 9529<br>Xq: 10579 - 9133<br>Yq: 10579 - 9133                                                                                                | 98.00<br>98.35<br>98.35                                     | 98.23 | 0 |
| 992  | 19p | 1      | 19667  | 19667  | 9p: 8506 - 27840<br>chr2: 114048111 - 114067751                                                                                                         | 98.81<br>98.03                                              | 98.42 | 0 |
| 993  | 19p | 1      | 109077 | 109077 | 15q: 116787 - 8621                                                                                                                                      | 98.47                                                       | 98.47 | 0 |
| 994  | 19p | 15718  | 19667  | 3950   | 12p: 1705 - 5645                                                                                                                                        | 96.98                                                       | 96.98 | 0 |
| 995  | 19p | 51596  | 143803 | 92208  | 6p: 1 - 87328                                                                                                                                           | 98.18                                                       | 98.18 | 0 |
| 996  | 19p | 68278  | 116908 | 48631  | 1p: 70481 - 120046                                                                                                                                      | 98.63                                                       | 98.63 | 0 |
| 997  | 19p | 68278  | 131513 | 63236  | 8p: 37604 - 103892                                                                                                                                      | 98.38                                                       | 98.38 | 0 |
| 998  | 19p | 68945  | 124695 | 55751  | 6q: 133270 - 72955                                                                                                                                      | 98.45                                                       | 98.45 | 0 |
| 999  | 19p | 68945  | 176313 | 107369 | 5q: 189359 - 80764                                                                                                                                      | 98.53                                                       | 98.53 | 0 |
| 1000 | 19p | 69632  | 185488 | 115857 | 11p: 1 - 115235                                                                                                                                         | 98.63                                                       | 98.63 | 0 |
| 1001 | 19p | 112806 | 138324 | 25519  | chrY: 25847059 - 25878360<br>chrY: 24760333 - 24791629                                                                                                  | 95.75<br>95.76                                              | 95.75 | 0 |
| 1002 | 19p | 112806 | 144474 | 31669  | 20q: 46227 - 21029<br>chr1: 239518849 - 239549639<br>chr10: 38769794 - 38800932<br>chr4: 119904851 - 119936314                                          | 97.53<br>97.05<br>96.67<br>96.83                            | 97.02 | 0 |
|      |     |        |        |        | 7p: 2360 - 75103                                                                                                                                        | 98.42                                                       |       |   |
|      |     |        |        |        | 16q: 105895 - 32910                                                                                                                                     |                                                             |       |   |
|      |     |        |        |        |                                                                                                                                                         |                                                             |       |   |
|      |     |        |        |        |                                                                                                                                                         |                                                             |       |   |
|      |     |        |        |        |                                                                                                                                                         |                                                             |       |   |

|      |     |        |        |       |                                                                                                                                                                              |                                                    |       |   |
|------|-----|--------|--------|-------|------------------------------------------------------------------------------------------------------------------------------------------------------------------------------|----------------------------------------------------|-------|---|
| 1007 | 19p | 117052 | 118231 | 1180  | 1p: 120190 - 121369                                                                                                                                                          | 98.03                                              | 98.03 | 0 |
| 1008 | 19p | 117052 | 137121 | 20070 | chr1: 220425641 - 220445916                                                                                                                                                  | 97.07                                              | 97.07 | 0 |
| 1009 | 19p | 121798 | 145776 | 23979 | 1p: 124946 - 147924                                                                                                                                                          | 98.85                                              | 98.85 | 0 |
| 1010 | 19p | 123290 | 125228 | 1939  | chr1: 224457838 - 224459772                                                                                                                                                  | 97.34                                              | 97.34 | 0 |
| 1011 | 19p | 123991 | 185488 | 61498 | 3q: 60988 - 1                                                                                                                                                                | 98.72                                              | 98.72 | 0 |
| 1012 | 19p | 125582 | 138324 | 12743 | chr1: 224467506 - 224480262                                                                                                                                                  | 96.86                                              | 96.86 | 0 |
| 1013 | 19p | 129136 | 138027 | 8892  | chr7: 55985248 - 55994150                                                                                                                                                    | 94.6                                               | 94.6  | 0 |
| 1014 | 19p | 129139 | 131162 | 2024  | chr7: 61805021 - 61806480<br>chr1: 193837523 - 193839718<br>chr7: 55420846 - 55423188                                                                                        | 92.37<br>93.09<br>92.44                            | 92.63 | 0 |
| 1015 | 19p | 129159 | 135874 | 6716  | chr7: 45414266 - 45420987                                                                                                                                                    | 94.82                                              | 94.82 | 0 |
| 1016 | 19p | 133122 | 144698 | 11577 | chr7: 127667204 - 127677946                                                                                                                                                  | 96.6                                               | 96.6  | 0 |
| 1017 | 19p | 133141 | 135874 | 2734  | chr7: 51009103 - 51011866<br>chr7: 55363599 - 55366358<br>chr7: 56432157 - 56434907<br>chr7: 39393644 - 39396387<br>chr7: 62457999 - 62460749<br>chr1: 219029846 - 219032485 | 93.00<br>94.00<br>94.00<br>93.00<br>94.00<br>97.00 | 94.17 | 0 |
| 1018 | 19p | 134445 | 144698 | 10254 | chr4: 120680507 - 120690600                                                                                                                                                  | 94.83                                              | 94.83 | 0 |
| 1019 | 19p | 135964 | 137723 | 1760  | chr1: 219032574 - 219033728<br>chr7: 56434997 - 56436149<br>chr7: 55366448 - 55368463<br>chr7: 62455575 - 62457909<br>chr7: 51011956 - 51014002<br>chr7: 39391514 - 39393554 | 96.86<br>94.15<br>94.48<br>93.77<br>94.76<br>95.02 | 94.84 | 0 |
| 1020 | 19p | 135964 | 143392 | 7429  | chr7: 45403637 - 45414176                                                                                                                                                    | 95.23                                              | 95.23 | 0 |
| 1021 | 19p | 138029 | 143392 | 5364  | chr1: 224460233 - 224466670                                                                                                                                                  | 94.42                                              | 94.42 | 0 |
| 1022 | 19p | 142094 | 145776 | 3683  | 1p: 147657 - 151331                                                                                                                                                          | 98.39                                              | 98.39 | 0 |
| 1023 | 19p | 142094 | 149620 | 7527  | 1p: 151063 - 158591                                                                                                                                                          | 98.58                                              | 98.58 | 0 |
| 1024 | 19p | 142097 | 143392 | 1296  | chr7: 51020104 - 51021398                                                                                                                                                    | 95.53                                              | 95.53 | 0 |
| 1025 | 19p | 142098 | 144698 | 2601  | chr1: 219039323 - 219041921<br>chr7: 55375429 - 55378337<br>chr7: 56005902 - 56008498<br>chr7: 39386597 - 39389187<br>chr1: 220447184 - 220449733                            | 96.72<br>96.61<br>96.65<br>96.16<br>98.20          | 96.87 | 0 |
| 1026 | 19p | 145508 | 162092 | 16585 | chr7: 56005902 - 56027313                                                                                                                                                    | 92.91                                              | 92.91 | 0 |
| 1027 | 19p | 145508 | 179758 | 34251 | chr1: 219039323 - 219081989                                                                                                                                                  | 97.15                                              | 97.15 | 0 |
| 1028 | 19p | 145508 | 182218 | 36711 | chr1: 239547046 - 239589627<br>chr4: 120688005 - 120730560                                                                                                                   | 97.34<br>96.40                                     | 96.87 | 0 |
| 1029 | 19p | 145555 | 148263 | 2709  | chr7: 55375429 - 55383906<br>chr7: 56015725 - 56026447                                                                                                                       | 94.40<br>90.67                                     | 92.53 | 0 |
| 1030 | 19p | 147884 | 182218 | 34335 | chr10: 38729667 - 38764372<br>chr4: 119870679 - 119899413                                                                                                                    | 96.98<br>97.20                                     | 97.09 | 0 |
| 1031 | 19p | 147887 | 149620 | 1734  | chr7: 127660030 - 127661758                                                                                                                                                  | 94.57                                              | 94.57 | 0 |
| 1032 | 19p | 147887 | 169131 | 21245 | chr7: 39360178 - 39381110                                                                                                                                                    | 92.89                                              | 92.89 | 0 |
| 1033 | 19p | 147887 | 173860 | 25974 | chr1: 220455168 - 220481396                                                                                                                                                  | 97.73                                              | 97.73 | 0 |
| 1034 | 19p | 147911 | 152151 | 4241  | chr7: 45392682 - 45396890                                                                                                                                                    | 95.86                                              | 95.86 | 0 |
| 1035 | 19p | 149256 | 152151 | 2896  | chr7: 55385064 - 55388239                                                                                                                                                    | 92.87                                              | 92.87 | 0 |
| 1036 | 19p | 149256 | 155026 | 5771  | chr7: 56475714 - 56481294<br>chr7: 62412186 - 62417768<br>chr7: 51029490 - 51036010                                                                                          | 90.50<br>90.50<br>92.79                            | 91.26 | 0 |
| 1037 | 19p | 151899 | 154772 | 2874  | chr11: 50000552 - 50003428<br>chr7: 64516409 - 64519292                                                                                                                      | 90.00<br>91.46                                     | 90.73 | 0 |
| 1038 | 19p | 151899 | 161226 | 9328  | chr7: 65587537 - 65593232                                                                                                                                                    | 91.29                                              | 91.29 | 0 |
| 1039 | 19p | 151899 | 164008 | 12110 | chr7: 127645453 - 127657799                                                                                                                                                  | 95.93                                              | 95.93 | 0 |
| 1040 | 19p | 151899 | 182218 | 30320 | 1p: 160844 - 191186                                                                                                                                                          | 98.41                                              | 98.41 | 0 |
| 1041 | 19p | 155388 | 160927 | 5540  | chr7: 64511343 - 64515807                                                                                                                                                    | 91.43                                              | 91.43 | 0 |
| 1042 | 19p | 160708 | 185488 | 24781 | 9q: 25531 - 834                                                                                                                                                              | 98.24                                              | 98.24 | 0 |
| 1043 | 19p | 160992 | 182218 | 21227 | chr7: 45368447 - 45389874                                                                                                                                                    | 96.35                                              | 96.35 | 0 |
| 1044 | 19p | 163261 | 164727 | 1467  | chr7: 64507178 - 64508843                                                                                                                                                    | 92.01                                              | 92.01 | 0 |
| 1045 | 19p | 163745 | 169187 | 5443  | chr7: 56029594 - 56035175                                                                                                                                                    | 92.74                                              | 92.74 | 0 |
| 1046 | 19p | 164962 | 166351 | 1390  | chr7: 65561411 - 65562799                                                                                                                                                    | 90.72                                              | 90.72 | 0 |
| 1047 | 19p | 170070 | 171196 | 1127  | chr7: 56036051 - 56037182                                                                                                                                                    | 92.98                                              | 92.98 | 0 |
| 1048 | 19p | 171157 | 179758 | 8602  | chr7: 127636388 - 127644996                                                                                                                                                  | 95.2                                               | 95.2  | 0 |

|      |     |        |        |       |                                                                                                                                                                                                                         |                                                                                        |       |   |
|------|-----|--------|--------|-------|-------------------------------------------------------------------------------------------------------------------------------------------------------------------------------------------------------------------------|----------------------------------------------------------------------------------------|-------|---|
| 1049 | 19p | 173726 | 175216 | 1491  | chr7: 75222310 - 75223826<br>chr7: 65540948 - 65542445                                                                                                                                                                  | 92.69<br>94.40                                                                         | 93.55 | 0 |
| 1050 | 19p | 176709 | 178070 | 1362  | chr7: 63774859 - 63776250<br>chr7: 64469009 - 64470133                                                                                                                                                                  | 90.56<br>90.16                                                                         | 90.36 | 0 |
| 1051 | 19p | 178356 | 182218 | 3863  | chr1: 220481705 - 220485566                                                                                                                                                                                             | 96.99                                                                                  | 96.99 | 0 |
| 1052 | 19p | 181756 | 198474 | 16719 | 8p: 104641 - 123046                                                                                                                                                                                                     | 96.74                                                                                  | 96.74 | 0 |
| 1053 | 19p | 182231 | 183859 | 1629  | 1p: 281741 - 283465<br>16q: 7077 - 5156<br>21q: 19448 - 18188                                                                                                                                                           | 96.51<br>95.40<br>96.00                                                                | 95.97 | 0 |
| 1054 | 19p | 182254 | 185274 | 3021  | 10q: 21268 - 18113<br>6p: 91944 - 94765<br>1q: 12155 - 9311<br>18p: 91554 - 94727<br>19q: 16721 - 13461<br>22q: 19704 - 16443<br>4p: 14618 - 17154<br>4q: 8797 - 6261<br>chr2: 114093933 - 114097189<br>2p: 3251 - 6167 | 93.66<br>93.04<br>93.19<br>94.67<br>96.95<br>96.88<br>93.85<br>93.96<br>97.03<br>91.52 | 94.47 | 1 |
| 1055 | 19p | 189683 | 193721 | 4039  | 6q: 145794 - 139446                                                                                                                                                                                                     | 92.13                                                                                  | 92.13 | 0 |
| 1056 | 19p | 189683 | 199296 | 9614  | 5q: 13019 - 1037<br>17q: 17504 - 3110<br>10q: 17976 - 3829<br>21q: 18046 - 4338<br>6p: 91217 - 91808<br>22q: 16306 - 2133<br>chr2: 114079703 - 114093794                                                                | 95.55<br>95.45<br>96.26<br>96.04<br>95.43<br>96.26<br>96.18                            | 95.88 | 0 |
| 1057 | 19p | 190896 | 199385 | 8490  | 19q: 13324 - 639                                                                                                                                                                                                        | 96.04                                                                                  | 96.04 | 1 |
| 1058 | 19p | 193592 | 199283 | 5692  | 4p: 7699 - 14477<br>6q: 7193 - 1847<br>1q: 9172 - 4691                                                                                                                                                                  | 91.97<br>94.05<br>94.70                                                                | 93.57 | 0 |
| 1059 | 19p | 196019 | 197721 | 1703  | 5p: 617 - 2291                                                                                                                                                                                                          | 94.58                                                                                  | 94.58 | 0 |
| 1060 | 19p | 196022 | 199383 | 3362  | 16q: 5015 - 1705<br>4q: 6120 - 2781                                                                                                                                                                                     | 93.60<br>92.19                                                                         | 92.89 | 0 |
| 1061 | 19p | 196746 | 199380 | 2635  | 18p: 88797 - 91414                                                                                                                                                                                                      | 93.17                                                                                  | 93.17 | 0 |
| 1062 | 19q | 639    | 16745  | 16107 | 10q: 21689 - 5039<br>22q: 19746 - 3342<br>chr2: 114080913 - 114097231                                                                                                                                                   | 96.03<br>98.00<br>98.32                                                                | 97.45 | 0 |
| 1063 | 19q | 639    | 14724  | 14086 | 21q: 19448 - 5548                                                                                                                                                                                                       | 97.17                                                                                  | 97.17 | 0 |
| 1064 | 19q | 639    | 12948  | 12310 | 8p: 113859 - 123046<br>5q: 13019 - 2247<br>17q: 17504 - 4319<br>19p: 190896 - 199397                                                                                                                                    | 93.81<br>95.29<br>95.21<br>96.04                                                       | 95.09 | 1 |
| 1065 | 19q | 3954   | 16715  | 12762 | 1q: 12573 - 1764                                                                                                                                                                                                        | 94.48                                                                                  | 94.48 | 0 |
| 1066 | 19q | 3954   | 7796   | 3843  | chr3: 75756447 - 75760281                                                                                                                                                                                               | 93.52                                                                                  | 93.52 | 0 |
| 1067 | 19q | 4044   | 13018  | 8975  | 6q: 7193 - 1                                                                                                                                                                                                            | 94.64                                                                                  | 94.64 | 0 |
| 1068 | 19q | 7670   | 16713  | 9044  | 13q: 2231 - 1395<br>4p: 7719 - 17154                                                                                                                                                                                    | 91.92<br>92.68                                                                         | 92.3  | 0 |
| 1069 | 19q | 7670   | 10865  | 3196  | 6q: 147506 - 145671                                                                                                                                                                                                     | 90.65                                                                                  | 90.65 | 0 |
| 1070 | 19q | 10198  | 16551  | 6354  | 5p: 617 - 2423<br>16q: 7774 - 1705<br>4q: 8797 - 2781<br>18p: 88797 - 95146                                                                                                                                             | 93.63<br>94.07<br>92.78<br>94.01                                                       | 93.62 | 0 |
| 1071 | 19q | 13190  | 15273  | 2084  | 1p: 281205 - 283465<br>16q: 104535 - 102637                                                                                                                                                                             | 95.55<br>97.05                                                                         | 96.3  | 0 |
| 1072 | 19q | 13438  | 16749  | 3312  | 6p: 91533 - 95228<br>19p: 182231 - 185488<br>3q: 61030 - 57730<br>11p: 111977 - 115277<br>7p: 71845 - 75145<br>9q: 25573 - 22273                                                                                        | 92.75<br>96.96<br>96.93<br>96.79<br>96.66<br>96.66                                     | 95.65 | 1 |
|      |     |        |        |       |                                                                                                                                                                                                                         |                                                                                        |       |   |
|      |     |        |        |       | chr2: 110574910 - 110576267                                                                                                                                                                                             |                                                                                        |       |   |

|      |     |        |        |       |                                                                                                                                                                                                             |                                                             |       |   |
|------|-----|--------|--------|-------|-------------------------------------------------------------------------------------------------------------------------------------------------------------------------------------------------------------|-------------------------------------------------------------|-------|---|
| 1075 | 19q | 208689 | 210500 | 1812  | chr8: 81374441 - 81374984                                                                                                                                                                                   | 92.4                                                        | 92.4  | 0 |
| 1076 | 19q | 208781 | 215337 | 6557  | chrX: 6199833 - 6200483<br>chr6: 116684955 - 116685502                                                                                                                                                      | 93.51<br>95.79                                              | 94.65 | 0 |
| 1077 | 19q | 209984 | 215339 | 5356  | chr21: 33775923 - 33776376                                                                                                                                                                                  | 91.21                                                       | 91.21 | 0 |
| 1078 | 20p | 404459 | 408223 | 3765  | chr11: 11323729 - 11324230                                                                                                                                                                                  | 98.37                                                       | 98.37 | 0 |
| 1079 | 20p | 409322 | 429307 | 19986 | chr11: 11324227 - 11325163                                                                                                                                                                                  | 99.16                                                       | 99.16 | 0 |
| 1080 | 20q | 3777   | 18388  | 14612 | 12p: 27892 - 42389                                                                                                                                                                                          | 97.97                                                       | 97.97 | 0 |
| 1081 | 20q | 18783  | 45040  | 26258 | chrY: 24761547 - 24793892<br>chrY: 25844800 - 25877147                                                                                                                                                      | 96.02<br>95.99                                              | 96    | 0 |
| 1082 | 20q | 18783  | 41420  | 22638 | 2q: 37420 - 14408                                                                                                                                                                                           | 97.56                                                       | 97.56 | 0 |
| 1083 | 20q | 18783  | 19856  | 1074  | chr1: 220419136 - 220420213                                                                                                                                                                                 | 98                                                          | 98    | 0 |
| 1084 | 20q | 18785  | 36084  | 17300 | chr4: 165539678 - 165556918                                                                                                                                                                                 | 95.44                                                       | 95.44 | 0 |
| 1085 | 20q | 18888  | 46226  | 27339 | chr4: 119905733 - 119938569<br>16q: 64320 - 30092<br>chr10: 38770686 - 38803195<br>7p: 91 - 33495<br>chr1: 239517108 - 239548748                                                                            | 97.03<br>97.60<br>96.69<br>97.49<br>97.48                   | 97.26 | 0 |
| 1086 | 20q | 21028  | 50897  | 29870 | 6p: 62132 - 91344<br>6q: 139561 - 121665<br>8p: 85490 - 112773                                                                                                                                              | 98.23<br>97.49<br>97.28                                     | 97.67 | 0 |
| 1087 | 20q | 21028  | 46225  | 25198 | 5q: 156343 - 126263<br>19p: 112806 - 143803<br>11p: 43183 - 73516                                                                                                                                           | 97.71<br>97.70<br>97.75                                     | 97.72 | 0 |
| 1088 | 20q | 21307  | 25147  | 3841  | 1p: 115941 - 120046<br>chr1: 220421937 - 220425497                                                                                                                                                          | 97.78<br>97.94                                              | 97.86 | 0 |
| 1089 | 20q | 25288  | 35880  | 10593 | chr1: 220425641 - 220436743                                                                                                                                                                                 | 97.29                                                       | 97.29 | 0 |
| 1090 | 20q | 25288  | 27704  | 2417  | 1p: 120190 - 122607                                                                                                                                                                                         | 98.77                                                       | 98.77 | 0 |
| 1091 | 20q | 30035  | 35880  | 5846  | 1p: 124946 - 130821                                                                                                                                                                                         | 96.54                                                       | 96.54 | 0 |
| 1092 | 20q | 31196  | 33132  | 1937  | chr1: 224457838 - 224459772                                                                                                                                                                                 | 97.34                                                       | 97.34 | 0 |
| 1093 | 20q | 31895  | 46227  | 14333 | 3q: 19226 - 1                                                                                                                                                                                               | 98                                                          | 98    | 0 |
| 1094 | 20q | 33511  | 45818  | 12308 | chr1: 224460233 - 224480262                                                                                                                                                                                 | 96.9                                                        | 96.9  | 0 |
| 1095 | 20q | 37052  | 38981  | 1930  | chr1: 193837523 - 193838976<br>chr7: 61805021 - 61807375                                                                                                                                                    | 93.19<br>91.70                                              | 92.44 | 0 |
| 1096 | 20q | 37057  | 46223  | 9167  | chr1: 220437912 - 220448841<br>chr7: 55985248 - 56007603<br>1p: 131997 - 145957<br>chr7: 45403235 - 45420987                                                                                                | 97.49<br>95.09<br>97.95<br>95.12                            | 96.41 | 0 |
| 1097 | 20q | 38376  | 41943  | 3568  | chr7: 55422123 - 55425758                                                                                                                                                                                   | 91.58                                                       | 91.58 | 0 |
| 1098 | 20q | 41068  | 45827  | 4760  | chr7: 51009103 - 51021398<br>chr7: 62456760 - 62460749<br>chr7: 56432157 - 56436148<br>chr7: 39387491 - 39396387<br>chr7: 127668095 - 127677946<br>chr7: 55363599 - 55377459<br>chr1: 219029845 - 219041033 | 93.53<br>94.16<br>93.99<br>93.67<br>96.62<br>94.25<br>96.93 | 94.74 | 0 |
| 1099 | 20q | 42375  | 46227  | 3853  | chr4: 120680507 - 120689715                                                                                                                                                                                 | 94.64                                                       | 94.64 | 0 |
| 1100 | 20q | 398145 | 405831 | 7687  | chr8: 23391299 - 23395680                                                                                                                                                                                   | 92.14                                                       | 92.14 | 0 |
| 1101 | 20q | 442754 | 444018 | 1265  | 12q: 456964 - 455241                                                                                                                                                                                        | 90                                                          | 90    | 0 |
| 1102 | 21q | 2734   | 19448  | 16715 | 22q: 17706 - 532                                                                                                                                                                                            | 97.22                                                       | 97.22 | 0 |
| 1103 | 21q | 4338   | 19448  | 15111 | chr2: 114079703 - 114095193<br>10q: 19372 - 3829                                                                                                                                                            | 96.91<br>96.59                                              | 96.75 | 0 |
| 1104 | 21q | 4338   | 17671  | 13334 | 5q: 13019 - 1037<br>17q: 17504 - 3110<br>19p: 189683 - 199397<br>8p: 112649 - 123046                                                                                                                        | 95.05<br>95.52<br>95.57<br>93.76                            | 94.97 | 0 |
| 1105 | 21q | 4338   | 5796   | 1459  | 6q: 140926 - 139446                                                                                                                                                                                         | 91.85                                                       | 91.85 | 0 |
| 1106 | 21q | 5548   | 19448  | 13901 | 19q: 14724 - 639                                                                                                                                                                                            | 97.27                                                       | 97.27 | 0 |
| 1107 | 21q | 8673   | 19448  | 10776 | 1q: 10576 - 1764                                                                                                                                                                                            | 94.96                                                       | 94.96 | 0 |
| 1108 | 21q | 8673   | 12505  | 3833  | chr3: 75756447 - 75760281                                                                                                                                                                                   | 93.52                                                       | 93.52 | 0 |
| 1109 | 21q | 8764   | 17747  | 8984  | 6q: 7193 - 1                                                                                                                                                                                                | 94.37                                                       | 94.37 | 0 |
| 1110 | 21q | 12379  | 18851  | 6473  | 4p: 7719 - 15281                                                                                                                                                                                            | 91.64                                                       | 91.64 | 0 |
| 1111 | 21q | 12379  | 15574  | 3196  | 6q: 147506 - 145671                                                                                                                                                                                         | 90.65                                                       | 90.65 | 0 |
| 1112 | 21q | 14724  | 21380  | 6657  | 5p: 617 - 17258                                                                                                                                                                                             | 92.39                                                       | 92.39 | 0 |

|      |       |        |        |       |                                                                                                                                                                                                        |                                                                               |       |   |
|------|-------|--------|--------|-------|--------------------------------------------------------------------------------------------------------------------------------------------------------------------------------------------------------|-------------------------------------------------------------------------------|-------|---|
| 1113 | 21q   | 14968  | 19249  | 4282  | 16q: 6418 - 1705<br>4q: 6924 - 2781<br>18p: 88797 - 92815                                                                                                                                              | 93.54<br>91.68<br>93.35                                                       | 92.86 | 0 |
| 1114 | 21q   | 18082  | 19448  | 1367  | 1p: 281205 - 283004<br>6p: 91533 - 93211<br>7p: 71847 - 73106<br>19p: 182233 - 183494<br>8p: 105118 - 106379<br>16q: 103898 - 102639<br>9q: 23534 - 22275<br>11p: 111979 - 113241<br>3q: 58994 - 57732 | 95.19<br>93.18<br>95.69<br>95.69<br>95.70<br>95.69<br>95.69<br>96.13<br>96.13 | 95.45 | 0 |
| 1115 | 21q   | 18444  | 20521  | 2078  | 2p: 3280 - 17320                                                                                                                                                                                       | 92.63                                                                         | 92.63 | 0 |
| 1116 | 21q   | 20229  | 21380  | 1152  | chr3: 197230489 - 197231637                                                                                                                                                                            | 92                                                                            | 92    | 0 |
| 1117 | 21q   | 23660  | 26137  | 2478  | 2p: 89270 - 91971                                                                                                                                                                                      | 93.21                                                                         | 93.21 | 0 |
| 1118 | 22q   | 532    | 17706  | 17175 | 21q: 19448 - 2734                                                                                                                                                                                      | 97.1                                                                          | 97.1  | 0 |
| 1119 | 22q   | 2133   | 65623  | 63491 | chr2: 114079703 - 114144877                                                                                                                                                                            | 97.94                                                                         | 97.94 | 0 |
| 1120 | 22q   | 2133   | 19680  | 17548 | 10q: 21671 - 3829<br>17q: 17504 - 3110                                                                                                                                                                 | 95.86<br>95.33                                                                | 95.86 | 0 |
| 1121 | 22q   | 2133   | 15931  | 13799 | 5q: 13019 - 1037<br>19p: 189683 - 199397<br>8p: 112649 - 123046                                                                                                                                        | 94.98<br>96.25<br>93.54                                                       | 95.03 | 0 |
| 1122 | 22q   | 2133   | 3743   | 1611  | 6q: 141080 - 139446                                                                                                                                                                                    | 91.39                                                                         | 91.39 | 0 |
| 1123 | 22q   | 3342   | 19684  | 16343 | 19q: 16701 - 639                                                                                                                                                                                       | 98.05                                                                         | 98.05 | 0 |
| 1124 | 22q   | 6932   | 19684  | 12753 | 1q: 12559 - 1764                                                                                                                                                                                       | 94.15                                                                         | 94.15 | 0 |
| 1125 | 22q   | 6932   | 10786  | 3855  | chr3: 75756447 - 75760281                                                                                                                                                                              | 93.52                                                                         | 93.52 | 0 |
| 1126 | 22q   | 7022   | 16000  | 8979  | 6q: 7193 - 1<br>13q: 2219 - 1395                                                                                                                                                                       | 94.18<br>92.13                                                                | 94.18 | 0 |
| 1127 | 22q   | 10660  | 19682  | 9023  | 4p: 7719 - 17140                                                                                                                                                                                       | 92.45                                                                         | 92.29 | 0 |
| 1128 | 22q   | 10660  | 13855  | 3196  | 6q: 147506 - 145671                                                                                                                                                                                    | 90.65                                                                         | 90.65 | 0 |
| 1129 | 22q   | 13188  | 19523  | 6336  | 5p: 617 - 2407<br>16q: 7774 - 1705<br>4q: 8783 - 2781<br>18p: 88797 - 95132                                                                                                                            | 93.37<br>93.97<br>92.15<br>93.63                                              | 93.28 | 0 |
| 1130 | 22q   | 16172  | 18256  | 2085  | 1p: 281205 - 283465<br>16q: 104535 - 102637                                                                                                                                                            | 95.22<br>97.24                                                                | 96.23 | 0 |
| 1131 | 22q   | 16423  | 19683  | 3261  | 6p: 91533 - 95168<br>19p: 182231 - 185461<br>7p: 71845 - 75083<br>11p: 111977 - 115215<br>3q: 60968 - 57730<br>9q: 25511 - 22273<br>8p: 105117 - 108356<br>2p: 3280 - 6570                             | 92.49<br>97.00<br>96.93<br>97.02<br>97.02<br>96.93<br>96.76<br>92.00          | 95.77 | 0 |
| 1132 | 22q   | 338214 | 359132 | 20919 | chr8: 56523161 - 56528801                                                                                                                                                                              | 91.25                                                                         | 91.25 | 0 |
| 1133 | 22q   | 345476 | 359332 | 13857 | chr1: 11872093 - 11875082                                                                                                                                                                              | 91.1                                                                          | 91.1  | 0 |
| 1134 | 22q   | 363588 | 375954 | 12367 | chr21: 14300639 - 14310578                                                                                                                                                                             | 91.52                                                                         | 91.52 | 0 |
| 1135 | 22q   | 363588 | 375954 | 12367 | chr18: 14131836 - 14141611                                                                                                                                                                             | 90.72                                                                         | 90.72 | 0 |
| 1136 | Xp_Yp | 114316 | 123873 | 9558  | chr15: 20004096 - 20015923                                                                                                                                                                             | 92.15                                                                         | 92.15 | 0 |
| 1137 | Xq    | 2524   | 29837  | 27314 | 16p: 1462 - 28780<br>9p: 1894 - 9953                                                                                                                                                                   | 96.97<br>98.23                                                                | 96.97 | 0 |
| 1138 | Xq    | 2526   | 10579  | 8054  | 15q: 10069 - 2004<br>chr2: 114066302 - 114074366                                                                                                                                                       | 97.73<br>97.86                                                                | 97.94 | 0 |
| 1139 | Xq    | 9133   | 10579  | 1447  | 19p: 1 - 1448<br>9q: 123870 - 113409                                                                                                                                                                   | 98.34<br>92.89                                                                | 98.34 | 0 |
| 1140 | Xq    | 19014  | 29938  | 10925 | 18p: 68156 - 79029<br>10p: 64762 - 74476                                                                                                                                                               | 92.76<br>92.26                                                                | 92.64 | 0 |
| 1141 | Xq    | 419175 | 420323 | 1149  | chrX: 154128108 - 154129278                                                                                                                                                                            | 94.66                                                                         | 94.66 | 1 |
| 1142 | Yq    | 393125 | 395835 | 2711  | chr16: 33448552 - 33451269<br>chr2: 96049906 - 96052677                                                                                                                                                | 94.89<br>93.51                                                                | 94.89 | 0 |
|      |       |        |        |       | chr1: 145641470 - 145642988                                                                                                                                                                            |                                                                               |       |   |
