# Supplementary material for: Human subtelomeric duplicon structure and organization
Source: PubMed Central journal article supplement (PMC2323237; doi:10.1186/gb-2007-8-7-r151), 2007-07-30
Supplement: gb-2007-8-7-r151-S4.pdf [file gb-2007-8-7-r151-S4.pdf]

**Additional Data File 4. Modules defined by similarity to human subtelomeric DNA.**

|              | <b>Sub<br/>telomeric</b> | <b>Non-<br/>subtelomeric</b> | <b>Intra-<br/>chromosomal</b> |
|--------------|--------------------------|------------------------------|-------------------------------|
| <b>1p</b>    | 97                       | 68                           | 27                            |
| <b>1q</b>    | 15                       | 4                            | 2                             |
| <b>2p</b>    | 14                       | 3                            | 1                             |
| <b>2q</b>    | 31                       | 23                           |                               |
| <b>3p</b>    | 5                        | 5                            | 5                             |
| <b>3q</b>    | 84                       | 68                           | 2                             |
| <b>4p</b>    | 17                       | 5                            | 1                             |
| <b>4q</b>    | 39                       | 12                           | 1                             |
| <b>5p</b>    | 24                       | 15                           | 4                             |
| <b>5q</b>    | 80                       | 55                           | 4                             |
| <b>6p</b>    | 33                       | 18                           | 1                             |
| <b>6q</b>    | 35                       | 13                           | 1                             |
| <b>7p</b>    | 67                       | 44                           | 27                            |
| <b>7q</b>    | 1                        | 1                            |                               |
| <b>8p</b>    | 39                       | 14                           |                               |
| <b>8q</b>    | 3                        | 3                            |                               |
| <b>9p</b>    | 22                       | 18                           | 15                            |
| <b>9q</b>    | 42                       | 24                           |                               |
| <b>10p</b>   | 16                       | 10                           |                               |
| <b>10q</b>   | 40                       | 12                           |                               |
| <b>11p</b>   | 67                       | 46                           | 2                             |
| <b>11q</b>   | 2                        | 2                            |                               |
| <b>12p</b>   | 3                        | 1                            |                               |
| <b>12q</b>   | 1                        |                              |                               |
| <b>13q</b>   | 8                        | 2                            |                               |
| <b>14q</b>   | 29                       | 29                           | 13                            |
| <b>15q</b>   | 40                       | 35                           | 20                            |
| <b>16p</b>   | 6                        | 2                            |                               |
| <b>16q</b>   | 84                       | 54                           |                               |
| <b>17p</b>   | 2                        |                              |                               |
| <b>17q</b>   | 15                       | 5                            |                               |
| <b>18p</b>   | 29                       | 12                           | 1                             |
| <b>19p</b>   | 71                       | 45                           | 2                             |
| <b>19q</b>   | 16                       | 7                            | 2                             |
| <b>20p</b>   | 2                        | 2                            |                               |
| <b>20q</b>   | 22                       | 14                           |                               |
| <b>21q</b>   | 16                       | 3                            |                               |
| <b>22q</b>   | 18                       | 6                            |                               |
| <b>Xp_Yp</b> | 1                        | 1                            |                               |
| <b>Xq</b>    | 5                        | 2                            | 1                             |
| <b>Yq</b>    | 10                       | 7                            | 1                             |
| <b>Total</b> | <b>1151</b>              | <b>690</b>                   | <b>133</b>                    |
