# Supplementary material for: Human subtelomeric duplicon structure and organization
Source: PubMed Central journal article supplement (PMC2323237; doi:10.1186/gb-2007-8-7-r151), 2007-07-30

Additional Data File 5. Number and Size Range of Duplicons.

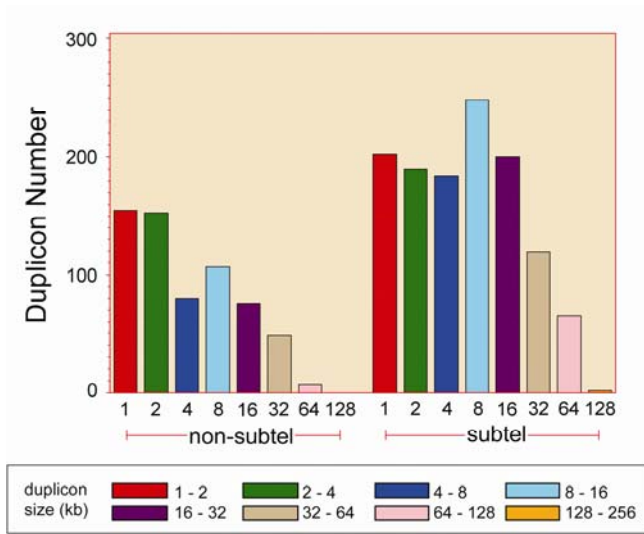

Supplement: gb-2007-8-7-r151-S5.pdf [file gb-2007-8-7-r151-S5.pdf]
