# Supplementary material for: Human subtelomeric duplicon structure and organization
Source: PubMed Central journal article supplement (PMC2323237; doi:10.1186/gb-2007-8-7-r151), 2007-07-30

# 2p

0 kb Gap

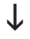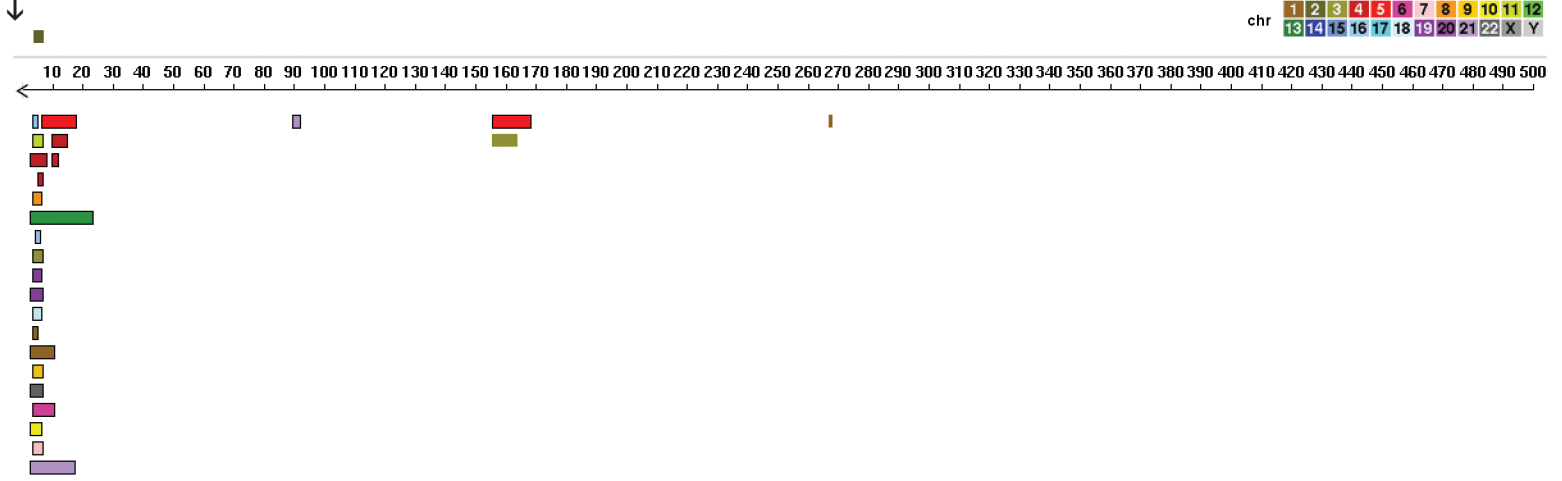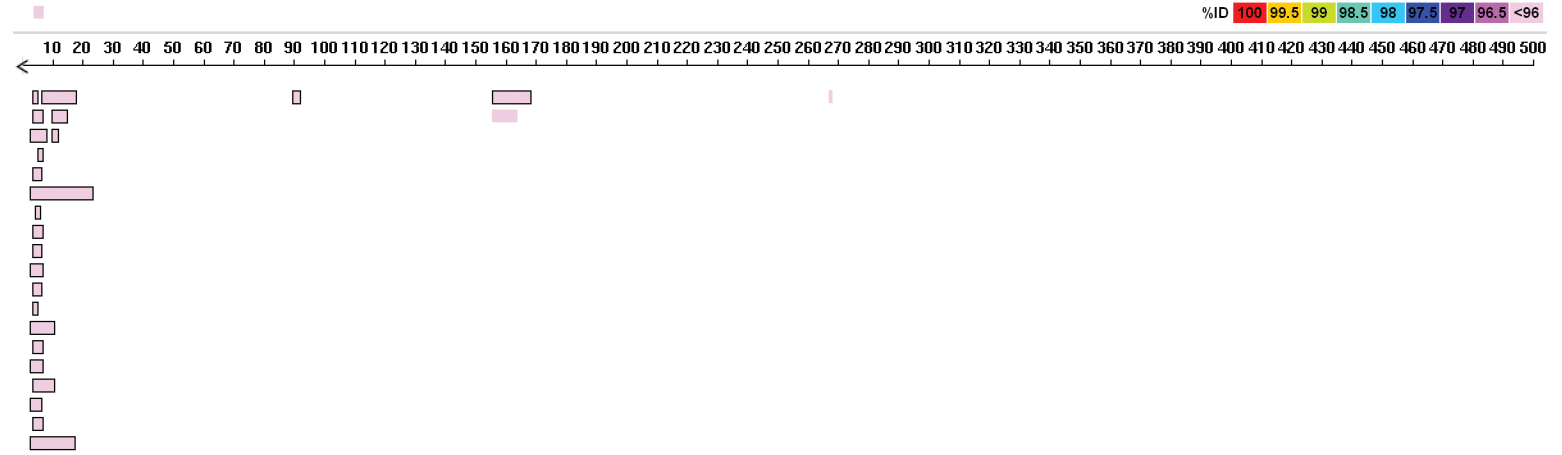

Supplement: gb-2007-8-7-r151-S8.pdf [file gb-2007-8-7-r151-S8.pdf]
