# Supplementary material for: Human subtelomeric duplicon structure and organization
Source: PubMed Central journal article supplement (PMC2323237; doi:10.1186/gb-2007-8-7-r151), 2007-07-30

# 18q

0 kb Gap

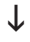

chr 

|    |    |    |    |    |    |    |    |    |    |    |    |
|----|----|----|----|----|----|----|----|----|----|----|----|
| 1  | 2  | 3  | 4  | 5  | 6  | 7  | 8  | 9  | 10 | 11 | 12 |
| 13 | 14 | 15 | 16 | 17 | 18 | 19 | 20 | 21 | 22 | X  | Y  |

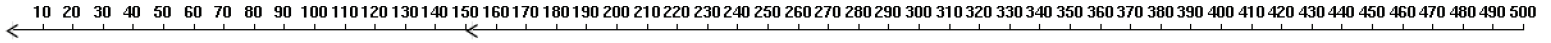

%ID 

|     |      |    |      |    |      |    |      |     |
|-----|------|----|------|----|------|----|------|-----|
| 100 | 99.5 | 99 | 98.5 | 98 | 97.5 | 97 | 96.5 | <96 |
|-----|------|----|------|----|------|----|------|-----|

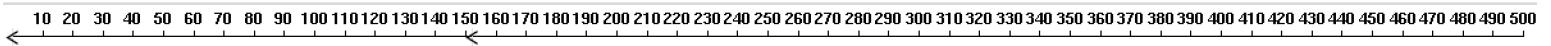

Supplement: gb-2007-8-7-r151-S38.pdf [file gb-2007-8-7-r151-S38.pdf]
