# Supplementary material for: Human subtelomeric duplicon structure and organization
Source: PubMed Central journal article supplement (PMC2323237; doi:10.1186/gb-2007-8-7-r151), 2007-07-30
Supplement: gb-2007-8-7-r151-S48.pdf [file gb-2007-8-7-r151-S48.pdf]

## Subtel-only blocks

| block | query sequence |        |        | len   | aligned sequences                                                                                                                              | %ID                                                         | Named Transcripts                                                     |
|-------|----------------|--------|--------|-------|------------------------------------------------------------------------------------------------------------------------------------------------|-------------------------------------------------------------|-----------------------------------------------------------------------|
| 1     | 1p             | 1      | 25292  | 25292 | 17q: 19570 - 43429<br>5q: 15084 - 41588<br>6q: 9260 - 33611<br>16q: 12682 - 13816                                                              | 97.61<br>98.10<br>98.42<br>97.15                            | sim to protein<br>phosphatase 1<br>inhibitor subunit 2                |
| 2     | 15q            | 29000  | 116788 | 87789 | 19p: 20386 - 109078<br>6p: 1 - 58403<br>11p: 1 - 39455<br>6q: 66845 - 117940<br>8p: 32210 - 81762<br>1p: 67656 - 112213<br>5q: 77269 - 122537  | 98.33<br>97.97<br>98.00<br>97.86<br>97.84<br>97.92<br>97.86 | OR4F3, OR4F4, OR4F5,<br>OR4F29, OR4F21,<br>OR4F16, OR4F17,<br>C6orf88 |
| 3     | 1p             | 245037 | 280290 | 35254 | 8p: 194471 - 231807                                                                                                                            | 97                                                          |                                                                       |
| 3a    | 1p             | 237884 | 242735 | 4852  | 8p: 134360 - 139200                                                                                                                            | 98                                                          | Znf596                                                                |
| 3b    | 1p             | 231380 | 233742 | 2363  | 8p: 279211 - 281570                                                                                                                            | 97                                                          | FAM87B                                                                |
| 4     | 1q             | 12455  | 15423  | 2969  | 6p: 95196 - 98868<br>5p: 2433 - 5242<br>4q: 8814 - 11635<br>13q: 2258 - 5129<br>4p: 17171 - 22773<br>2p: 6592 - 10454                          | 93.21<br>92.86<br>90.73<br>91.40<br>91.14<br>91.24          | sim to RPL23AP7<br>(multiple<br>transcripts)                          |
| 5     | 2p             | 6601   | 23214  | 16614 | 13q: 2258 - 15153<br>21q: 19455 - 21054<br>5p: 2449 - 16995<br>4p: 17171 - 27400<br>6p: 95211 - 98868<br>1q: 12594 - 15423<br>4q: 8814 - 14548 | 91.23<br>92.00<br>91.02<br>90.49<br>91.07<br>91.22<br>90.94 |                                                                       |
| 6     | 3q             | 60958  | 99281  | 38324 | 9q: 25703 - 62989<br>7p: 75073 - 141501<br>16q: 105940 - 131364<br>11p: 115754 - 129425<br>17p: 1 - 21439                                      | 97.89<br>97.71<br>97.15<br>97.35<br>97.69                   | sim to RPL23AP7<br>(multiple<br>transcripts)                          |
| 6'    | 11p            | 125961 | 136823 | 10863 | 17p: 21439 - 29146                                                                                                                             | 97.98                                                       | SCGB1C1                                                               |
| 7     | 4q             | 15654  | 43535  | 27882 | 10q: 14673 - 88676                                                                                                                             | *                                                           | DUX4                                                                  |
| 8     | 4q             | 111450 | 125571 | 14122 | 1p: 286892 - 291767<br>10p: 30149 - 56397<br>18p: 34540 - 42205<br>9q: 73305 - 75051<br>3q: 111837 - 116459<br>16q: 131398 - 136973            | 91.33<br>94.60<br>93.00<br>93.47<br>92.00<br>93.47          | TUBB4q                                                                |
| 9     | 5p             | 4451   | 16125  | 11675 | 4q: 8933 - 14656<br>4p: 19173 - 24814<br>13q: 5070 - 11775<br>2p: 9585 - 16953                                                                 | 92<br>92<br>92.42<br>91.26                                  |                                                                       |
| 10    | 2q             | 42832  | 91779  | 48948 | 8p: 290588 - 328066                                                                                                                            | 97.14                                                       | FBOXO25                                                               |
| 11    | 9q             | 88452  | 124137 | 35686 | 18p: 30838 - 69538<br>10p: 39691 - 74445<br>Xq+Yq: 18812 - 30108<br>16p: 17757 - 26950<br>16q: 138869 - 143475<br>4q: 100856 - 109294          | 95.68<br>95.37<br>92.18<br>91.88<br>94.63<br>91.26          | IL9R                                                                  |
| 12    | 12p            | 27892  | 42389  | 14498 | 20q: 3777 - 18388                                                                                                                              | 97.89                                                       | IQSEC3                                                                |
