# Supplementary material for: Human subtelomeric duplicon structure and organization
Source: PubMed Central journal article supplement (PMC2323237; doi:10.1186/gb-2007-8-7-r151), 2007-07-30
Supplement: gb-2007-8-7-r151-S49.pdf [file gb-2007-8-7-r151-S49.pdf]

Additional Data File 49. Subterminal Duplicons subterm | subtel | non-subtel

| Subterminal block           | Tel   | Size (kb) | Aligned sequences    | %ID   | Named Transcripts       |
|-----------------------------|-------|-----------|----------------------|-------|-------------------------|
| <b>A</b>                    | 2p    | 7         | 1q: 12558 - 9568     | 91.74 | Sim to RPL23AP7, FAM41C |
|                             |       |           | 4p: 15418 - 17140    | 91.78 |                         |
|                             |       |           | 4q: 8782 - 7060      | 92.15 |                         |
|                             |       |           | 16q: 7769 - 5896     | 92.46 |                         |
|                             |       |           | 21q: 19447 - 18443   | 92.35 |                         |
|                             |       |           | 10q: 21273 - 18370   | 92.11 |                         |
|                             |       |           | 22q: 19683 - 16700   | 92    |                         |
|                             |       |           | 19q: 16700 - 13690   | 91.94 |                         |
|                             |       |           | 9q: 25510 - 22502    | 91.98 |                         |
|                             |       |           | 6p: 92174 - 95168    | 91.76 |                         |
|                             |       |           | 11p: 112207 - 115215 | 92.11 |                         |
|                             |       |           | 7p: 72075 - 75083    | 91.98 |                         |
|                             |       |           | 3q: 60967 - 57959    | 92.11 |                         |
|                             |       |           | 19p: 182461 - 185461 | 92.05 |                         |
|                             |       |           | 18p: 91812 - 94731   | 92.22 |                         |
|                             |       |           | 8p: 105346 - 107957  | 92.65 |                         |
|                             |       |           | 16q: 104534 - 102866 | 91.9  |                         |
| 1p: 281971 - 283465         | 91.24 |           |                      |       |                         |
| chr2: 114095565 - 114098261 | 91.8  |           |                      |       |                         |
| <b>B</b>                    | 4p    | 17        | 2p: 3558 - 6584      | 91.88 | Sim to RPL23AP7, FAM41C |
|                             |       |           | 13q: 2230 - 1374     | 93.1  |                         |
|                             |       |           | 10q: 21688 - 12303   | 90.67 |                         |
|                             |       |           | 21q: 18850 - 12378   | 91.12 |                         |
|                             |       |           | 6q: 7194 - 1846      | 91.98 |                         |
|                             |       |           | 17q: 17505 - 12165   | 91.5  |                         |
|                             |       |           | 5q: 13020 - 7681     | 91.48 |                         |
|                             |       |           | 1q: 12572 - 4690     | 92.57 |                         |
|                             |       |           | 16q: 7773 - 1698     | 91.88 |                         |
|                             |       |           | 4q: 8796 - 2760      | 98.39 |                         |
|                             |       |           | 19q: 16730 - 7669    | 92.11 |                         |
|                             |       |           | 22q: 19713 - 10659   | 91.95 |                         |
|                             |       |           | 5p: 622 - 2423       | 91.95 |                         |
|                             |       |           | 9q: 25540 - 22274    | 93.66 |                         |
|                             |       |           | 8p: 120622 - 123052  | 91.01 |                         |
|                             |       |           | 19p: 193578 - 199396 | 91.27 |                         |
|                             |       |           | 6q: 147519 - 145650  | 90.57 |                         |
|                             |       |           | 18p: 88797 - 95146   | 92.65 |                         |
|                             |       |           | 6p: 91533 - 95199    | 92.93 |                         |
|                             |       |           | 1p: 281205 - 283465  | 91.78 |                         |
|                             |       |           | 16q: 104534 - 102638 | 92.94 |                         |
| 3q: 60997 - 57731           | 92.61 |           |                      |       |                         |
| 7p: 71847 - 75113           | 93.66 |           |                      |       |                         |
| 8p: 105118 - 108386         | 91.85 |           |                      |       |                         |
| 11p: 111979 - 115245        | 93.07 |           |                      |       |                         |
| 19p: 182233 - 185487        | 92.9  |           |                      |       |                         |
| chr2: 114089220 - 114097873 | 91.9  |           |                      |       |                         |

|          |     |    |                             |       |                                                |  |                             |       |  |
|----------|-----|----|-----------------------------|-------|------------------------------------------------|--|-----------------------------|-------|--|
| <b>C</b> | 9p  | 10 | 15q: 10068 - 2003           | 98.28 | Sim to MGC13005, Sim to DDX11, CXYorf1-related |  |                             |       |  |
|          |     |    | 19p: 1 - 1448               | 99    |                                                |  |                             |       |  |
|          |     |    | 16p: 1462 - 9529            | 98.28 |                                                |  |                             |       |  |
|          |     |    | Xq: 10578 - 2523            | 98.29 |                                                |  |                             |       |  |
|          |     |    | Yq: 10578 - 2523            | 98.29 |                                                |  |                             |       |  |
|          |     |    | chr2: 114067394 - 114075458 | 98.27 |                                                |  |                             |       |  |
| <b>D</b> | 10q | 22 | 19q: 16716 - 638            | 95.84 | Sim to RPL23AP7, FAM41C                        |  |                             |       |  |
|          |     |    | 4q: 8796 - 2780             | 91.19 |                                                |  |                             |       |  |
|          |     |    | 4p: 7699 - 17154            | 91.39 |                                                |  |                             |       |  |
|          |     |    | 2p: 5115 - 6171             | 90.7  |                                                |  |                             |       |  |
|          |     |    | 6q: 7192 - 0                | 94.95 |                                                |  |                             |       |  |
|          |     |    | 17q: 17503 - 3109           | 95.1  |                                                |  |                             |       |  |
|          |     |    | 5q: 13018 - 1036            | 95.99 |                                                |  |                             |       |  |
|          |     |    | 1q: 12158 - 1763            | 93.51 |                                                |  |                             |       |  |
|          |     |    | 21q: 19447 - 4337           | 96.65 |                                                |  |                             |       |  |
|          |     |    | 16q: 7773 - 1704            | 93.24 |                                                |  |                             |       |  |
|          |     |    | 22q: 19699 - 2132           | 95.85 |                                                |  |                             |       |  |
|          |     |    | 5p: 617 - 2423              | 93.27 |                                                |  |                             |       |  |
|          |     |    | 9q: 25526 - 22272           | 93.82 |                                                |  |                             |       |  |
|          |     |    | 6q: 141079 - 139445         | 91.68 |                                                |  |                             |       |  |
|          |     |    | 19p: 189683 - 199397        | 96.09 |                                                |  |                             |       |  |
|          |     |    | 18p: 88797 - 95146          | 96.03 |                                                |  |                             |       |  |
|          |     |    | 16q: 104534 - 102636        | 94.46 |                                                |  |                             |       |  |
|          |     |    | 19p: 182231 - 185062        | 94.09 |                                                |  |                             |       |  |
|          |     |    | 7p: 71845 - 75099           | 93.56 |                                                |  |                             |       |  |
|          |     |    | 11p: 111977 - 115231        | 93.44 |                                                |  |                             |       |  |
|          |     |    | 3q: 60983 - 57729           | 93.44 |                                                |  |                             |       |  |
|          |     |    | 8p: 105117 - 107957         | 93.97 |                                                |  |                             |       |  |
|          |     |    | 1p: 281205 - 283465         | 94.29 |                                                |  |                             |       |  |
|          |     |    | 6p: 91533 - 94769           | 91.95 |                                                |  |                             |       |  |
|          |     |    | 8p: 112649 - 123052         | 93.71 |                                                |  |                             |       |  |
|          |     |    |                             |       |                                                |  | chr2: 114080795 - 114098277 | 95.8  |  |
|          |     |    |                             |       |                                                |  | chr3: 75756446 - 75760280   | 93.69 |  |
| <b>E</b> | 17p | 21 | 11p: 119534 - 128459        | 96.12 |                                                |  |                             |       |  |
|          |     |    | 16q: 117979 - 111342        | 97.16 |                                                |  |                             |       |  |
|          |     |    | 7p: 81837 - 90234           | 97.16 |                                                |  |                             |       |  |
|          |     |    | 9q: 37992 - 31358           | 97.16 |                                                |  |                             |       |  |
|          |     |    | 3q: 75707 - 67230           | 95.97 |                                                |  |                             |       |  |
| <b>F</b> | 18p | 15 | 10p: 1 - 3292               | 99    |                                                |  |                             |       |  |
|          |     |    | 1p: 283791 - 286519         | 93.58 |                                                |  |                             |       |  |
|          |     |    | chr1: 224029771 - 224035342 | 91.4  |                                                |  |                             |       |  |
|          |     |    | chr2: 132392103 - 132393925 | 94.07 |                                                |  |                             |       |  |
|          |     |    | chr2: 132395267 - 132399115 | 94.27 |                                                |  |                             |       |  |
|          |     |    | chr12: 34153760 - 34159188  | 94.02 |                                                |  |                             |       |  |
|          |     |    | chr14: 18424456 - 18428301  | 91.19 |                                                |  |                             |       |  |
|          |     |    | chr14: 18429691 - 18431501  | 92    |                                                |  |                             |       |  |
|          |     |    | chr22: 14843625 - 14847482  | 91.19 |                                                |  |                             |       |  |
|          |     |    | chr22: 14840436 - 14842245  | 92.24 |                                                |  |                             |       |  |
