# Supplementary material for: Human subtelomeric duplicon structure and organization
Source: PubMed Central journal article supplement (PMC2323237; doi:10.1186/gb-2007-8-7-r151), 2007-07-30
Supplement: gb-2007-8-7-r151-S50.pdf [file gb-2007-8-7-r151-S50.pdf]

| <b>subtel-only block</b> | <b>Trask Block</b> | <b>Coverage of Trask block</b> |
|--------------------------|--------------------|--------------------------------|
| <b>1</b>                 | Block19            | 46%                            |
|                          | Block28            | 85%                            |
| <b>2</b>                 | Block5             | 92%                            |
|                          | Block3             | 97%                            |
| <b>3</b>                 | Block35            | 91%                            |
| <b>3a</b>                | Block34            | 84%                            |
|                          | Block38            | 20%                            |
| <b>3b</b>                | Block36            | 59%                            |
| <b>4</b>                 | Block32            | 46%                            |
|                          | Block39            | 14%                            |
| <b>5</b>                 | Block32            | 46%                            |
|                          | Block39            | 38%                            |
| <b>6</b>                 | Block11            | 95%                            |
|                          | Block12            | 98%                            |
|                          | Block13            | 100%                           |
| <b>6a</b>                | Block29            | 72%                            |
| <b>7</b>                 | --                 | --                             |
| <b>8</b>                 | Block15            | 20%                            |
|                          | Block14            | 13%                            |
| <b>9</b>                 | Block39            | 39%                            |
|                          | Block32            | 25%                            |
| <b>10</b>                | --                 | --                             |
| <b>11</b>                | Block16            | 72%                            |
|                          | Block17            | 93%                            |
| <b>12</b>                | Block27            | 56%                            |
| <b>subterm block</b>     |                    |                                |
|                          |                    |                                |
| <b>A</b>                 | Block25            | 84%                            |
| <b>B</b>                 | Block24            | 45%                            |
|                          | Block25            | 92%                            |
| <b>C</b>                 | Block1             | 96%                            |
| <b>D</b>                 | Block23            | 36%                            |
|                          | Block24            | 100%                           |
|                          | Block25            | 91%                            |
| <b>E</b>                 | Block11            | 76%                            |
| <b>F</b>                 | Block30            | 96%                            |
