# Supplementary material for: Human subtelomeric duplicon structure and organization
Source: PubMed Central journal article supplement (PMC2323237; doi:10.1186/gb-2007-8-7-r151), 2007-07-30
Supplement: gb-2007-8-7-r151-S51.pdf [file gb-2007-8-7-r151-S51.pdf]

| subtel-only block | refseq accession               | description                                                                                                        | Percent ID | coverage |
|-------------------|--------------------------------|--------------------------------------------------------------------------------------------------------------------|------------|----------|
| 1                 | gi 88942280 ref XM_496331.2    | PREDICTED: Homo sapiens hypothetical LOC440551 (LOC440551), mRNA, 1710 bp                                          | 100        | 99       |
| 1                 | gi 88954198 ref XM_932777.1    | PREDICTED: Homo sapiens similar to F-box only protein 25 isoform 2, transcript variant 3 (LOC653224), mRNA, 992 bp | 96.9       | 32       |
| 2                 | gi 88986529 ref XM_929243.1    | PREDICTED: Homo sapiens similar to Olfactory receptor 4F3 (LOC653728), mRNA, 1732 bp                               | 99.1       | 100      |
| 2                 | gi 88942152 ref XM_927013.1    | PREDICTED: Homo sapiens similar to Olfactory receptor 4F3 (LOC653345), mRNA, 1732 bp                               | 99.1       | 100      |
| 2                 | gi 57528065 ref NM_001004195.2 | Homo sapiens olfactory receptor, family 4, subfamily F, member 4 (OR4F4), mRNA, 918 bp                             | 100        | 100      |
| 2                 | gi 52421344 ref NM_001005221.1 | Homo sapiens olfactory receptor, family 4, subfamily F, member 29 (OR4F29), mRNA, 939 bp                           | 99.4       | 100      |
| 2                 | gi 53933273 ref NM_001005504.1 | Homo sapiens olfactory receptor, family 4, subfamily F, member 21 (OR4F21), mRNA, 939 bp                           | 99.4       | 100      |
| 2                 | gi 52421348 ref NM_001005224.1 | Homo sapiens olfactory receptor, family 4, subfamily F, member 3 (OR4F3), mRNA, 939 bp                             | 99.3       | 100      |
| 2                 | gi 52627208 ref NM_001005277.1 | Homo sapiens olfactory receptor, family 4, subfamily F, member 16 (OR4F16), mRNA, 939 bp                           | 99.3       | 100      |
| 2                 | gi 52546738 ref NM_001005240.1 | Homo sapiens olfactory receptor, family 4, subfamily F, member 17 (OR4F17), mRNA, 918 bp                           | 99.7       | 100      |
| 2                 | gi 53828739 ref NM_001005484.1 | Homo sapiens olfactory receptor, family 4, subfamily F, member 5 (OR4F5), mRNA, 918 bp                             | 99.3       | 100      |
| 2                 | gi 88990420 ref XM_496791.2    | PREDICTED: Homo sapiens hypothetical LOC441123, transcript variant 1 (LOC441123), mRNA, 972 bp                     | 99.3       | 27       |
| 2                 | gi 88990418 ref XM_930599.1    | PREDICTED: Homo sapiens hypothetical LOC441123, transcript variant 2 (LOC441123), mRNA, 930 bp                     | 99.3       | 28       |
| 2                 | gi 89027702 ref XM_927320.1    | PREDICTED: Homo sapiens similar to microtubule associated serine/threonine kinase 2 (LOC644091), mRNA, 690 bp      | 95.6       | 83       |
| 3                 | gi 88944470 ref XM_936770.1    | PREDICTED: Homo sapiens hypothetical protein LOC647710 (LOC647710), mRNA, 958 bp                                   | 99.8       | 100      |
| 3                 | gi 88942300 ref XM_927114.1    | PREDICTED: Homo sapiens hypothetical protein LOC643837 (LOC643837), mRNA, 1051 bp                                  | 100        | 100      |
| 3                 | gi 89028471 ref XM_936324.1    | PREDICTED: Homo sapiens hypothetical protein LOC642169 (LOC642169), mRNA, 958 bp                                   | 97.9       | 100      |

|           |                             |                                                                                                           |      |     |
|-----------|-----------------------------|-----------------------------------------------------------------------------------------------------------|------|-----|
| <b>3</b>  | gi 89027710 ref XM_927357.1 | PREDICTED: Homo sapiens hypothetical protein LOC644147 (LOC644147), mRNA, 1105 bp                         | 97.6 | 100 |
| <b>3b</b> | gi 88942298 ref XM_927098.1 | PREDICTED: Homo sapiens family with sequence similarity 87, member B (FAM87B), mRNA, 1935 bp              | 100  | 94  |
| <b>4</b>  | gi 88952946 ref XM_937539.1 | PREDICTED: Homo sapiens hypothetical protein LOC648490 (LOC648490), mRNA, 375 bp                          | 98.4 | 65  |
| <b>4</b>  | gi 88943945 ref XM_925877.1 | PREDICTED: Homo sapiens similar to similar to RPL23AP7 protein (LOC653081), mRNA, 279 bp                  | 97.4 | 54  |
| <b>6</b>  | gi 89030138 ref XM_927024.1 | PREDICTED: Homo sapiens similar to similar to RPL23AP7 protein (LOC653346), mRNA, 916 bp                  | 100  | 45  |
| <b>6</b>  | gi 89026748 ref XM_935631.1 | PREDICTED: Homo sapiens similar to RPL23AP7 protein (MGC70863), mRNA, 913 bp                              | 99.5 | 45  |
| <b>6</b>  | gi 89040554 ref XM_926151.1 | PREDICTED: Homo sapiens similar to similar to RPL23AP7 protein (LOC653138), mRNA, 913 bp                  | 99   | 45  |
| <b>6a</b> | gi 21717813 ref NM_145651.1 | Homo sapiens secretoglobin, family 1C, member 1 (SCGB1C1), mRNA, 431 bp                                   | 99.5 | 100 |
| <b>6a</b> | gi 89042044 ref XM_927639.1 | PREDICTED: Homo sapiens similar to secretoglobin, family 1C, member 1 (LOC653486), mRNA, 424 bp           | 98.1 | 100 |
| <b>8</b>  | gi 55770867 ref NM_020040.3 | Homo sapiens tubulin, beta polypeptide 4, member Q (TUBB4Q), mRNA, 1305 bp                                | 99.9 | 100 |
| <b>8</b>  | gi 88981265 ref XM_945046.1 | PREDICTED: Homo sapiens similar to Tubulin beta-4q chain, transcript variant 3 (LOC649679), mRNA, 2102 bp | 98   | 100 |
| <b>8</b>  | gi 88981262 ref XM_945045.1 | PREDICTED: Homo sapiens similar to Tubulin beta-4q chain, transcript variant 2 (LOC649679), mRNA, 1348 bp | 97.4 | 100 |
| <b>8</b>  | gi 88981268 ref XM_941232.1 | PREDICTED: Homo sapiens similar to Tubulin beta-4q chain, transcript variant 1 (LOC649679), mRNA, 1713 bp | 97.6 | 100 |
| <b>8</b>  | gi 89030119 ref XM_932731.1 | PREDICTED: Homo sapiens similar to tubulin, beta 8, transcript variant 4 (LOC643224), mRNA, 1572 bp       | 95.2 | 100 |
| <b>8</b>  | gi 89030123 ref XM_932740.1 | PREDICTED: Homo sapiens similar to tubulin, beta 8, transcript variant 6 (LOC643224), mRNA, 2199 bp       | 95.3 | 100 |
| <b>8</b>  | gi 89030121 ref XM_932733.1 | PREDICTED: Homo sapiens similar to tubulin, beta 8, transcript variant 5 (LOC643224), mRNA, 1422 bp       | 95.1 | 100 |
| <b>8</b>  | gi 89030115 ref XM_928232.1 | PREDICTED: Homo sapiens similar to tubulin, beta 8, transcript variant 1 (LOC643224), mRNA, 2225 bp       | 95.1 | 100 |
| <b>8</b>  | gi 89030113 ref XM_932717.1 | PREDICTED: Homo sapiens similar to tubulin, beta 8, transcript variant 2 (LOC643224), mRNA, 1786 bp       | 95.5 | 100 |
| <b>8</b>  | gi 42558278 ref NM_177987.1 | Homo sapiens tubulin, beta 8 (TUBB8), mRNA, 1335 bp                                                       | 95.1 | 100 |

|           |                             |                                                                                                                    |      |     |
|-----------|-----------------------------|--------------------------------------------------------------------------------------------------------------------|------|-----|
| <b>8</b>  | gi 89030117 ref XM_932725.1 | PREDICTED: Homo sapiens similar to tubulin, beta 8, transcript variant 3 (LOC643224), mRNA, 1342 bp                | 96   | 100 |
| <b>10</b> | gi 88954194 ref XM_932773.1 | PREDICTED: Homo sapiens similar to F-box only protein 25 isoform 2, transcript variant 2 (LOC653224), mRNA, 545 bp | 100  | 47  |
| <b>12</b> | gi 89057930 ref XM_375928.3 | PREDICTED: Homo sapiens similar to IQ motif and Sec7 domain 3 (LOC400855), mRNA, 2723 bp                           | 99.2 | 100 |
| <b>12</b> | gi 89077212 ref XM_942369.1 | PREDICTED: Homo sapiens IQ motif and Sec7 domain 3 (IQSEC3), mRNA, 558 bp                                          | 99.6 | 100 |
