# Supplementary material for: Human subtelomeric duplicon structure and organization
Source: PubMed Central journal article supplement (PMC2323237; doi:10.1186/gb-2007-8-7-r151), 2007-07-30
Supplement: gb-2007-8-7-r151-S52.pdf [file gb-2007-8-7-r151-S52.pdf]

| Subterm Block | Accession                   | Description                                                                                 | Percent ID | Coverage |
|---------------|-----------------------------|---------------------------------------------------------------------------------------------|------------|----------|
| A             | gi 89050223 ref XM_928041.1 | PREDICTED: Homo sapiens hypothetical protein LOC644964 (LOC644964), mRNA, 531 bp            | 92.1       | 100      |
| A             | gi 88944468 ref XM_936761.1 | PREDICTED: Homo sapiens family with sequence similarity 41, member C (FAM41C), mRNA, 660 bp | 91.6       | 75       |
| A             | gi 88942302 ref XM_496333.2 | PREDICTED: Homo sapiens family with sequence similarity 41, member C (FAM41C), mRNA, 660 bp | 91.6       | 75       |
| A             | gi 89033725 ref XM_925804.1 | PREDICTED: Homo sapiens similar to similar to RPL23AP7 protein (LOC642257), mRNA, 529 bp    | 91.9       | 100      |
| A             | gi 89027706 ref XM_927336.1 | PREDICTED: Homo sapiens hypothetical protein LOC644113 (LOC644113), mRNA, 531 bp            | 91.1       | 100      |
| A             | gi 89026748 ref XM_935631.1 | PREDICTED: Homo sapiens similar to RPL23AP7 protein (MGC70863), mRNA, 913 bp                | 91.2       | 54       |
| A             | gi 89040554 ref XM_926151.1 | PREDICTED: Homo sapiens similar to similar to RPL23AP7 protein (LOC653138), mRNA, 913 bp    | 91.2       | 54       |
| A             | gi 89030138 ref XM_927024.1 | PREDICTED: Homo sapiens similar to similar to RPL23AP7 protein (LOC653346), mRNA, 916 bp    | 91.2       | 54       |
| A             | gi 89024636 ref XM_928275.1 | PREDICTED: Homo sapiens similar to similar to RPL23AP7 protein (LOC645236), mRNA, 526 bp    | 91.3       | 100      |
| A             | gi 89027700 ref XM_927280.1 | PREDICTED: Homo sapiens similar to similar to RPL23AP7 protein (LOC644033), mRNA, 531 bp    | 91         | 100      |
| A             | gi 89066164 ref XM_939197.1 | PREDICTED: Homo sapiens similar to similar to RPL23AP7 protein (LOC650103), mRNA, 531 bp    | 90.8       | 100      |
| A             | gi 89040556 ref XM_926164.1 | PREDICTED: Homo sapiens hypothetical protein LOC642720 (LOC642720), mRNA, 531 bp            | 90.6       | 100      |
| A             | gi 88952946 ref XM_937539.1 | PREDICTED: Homo sapiens hypothetical protein LOC648490 (LOC648490), mRNA, 375 bp            | 94.3       | 37       |
| A             | gi 88943945 ref XM_925877.1 | PREDICTED: Homo sapiens similar to similar to RPL23AP7 protein (LOC653081), mRNA, 279 bp    | 94.3       | 50       |
| B             | gi 89027700 ref XM_927280.1 | PREDICTED: Homo sapiens similar to similar to RPL23AP7 protein (LOC644033), mRNA, 531 bp    | 94.6       | 55       |
| B             | gi 89066164 ref XM_939197.1 | PREDICTED: Homo sapiens similar to similar to RPL23AP7 protein (LOC650103), mRNA, 531 bp    | 94.2       | 55       |
| B             | gi 89050223 ref XM_928041.1 | PREDICTED: Homo sapiens hypothetical protein LOC644964 (LOC644964), mRNA, 531 bp            | 93.1       | 59       |
| B             | gi 89040556 ref XM_926164.1 | PREDICTED: Homo sapiens hypothetical protein LOC642720 (LOC642720), mRNA, 531 bp            | 93.9       | 55       |
| B             | gi 89033725 ref XM_925804.1 | PREDICTED: Homo sapiens similar to similar to RPL23AP7 protein (LOC642257), mRNA, 529 bp    | 93.4       | 60       |

|          |                             |                                                                                                              |      |     |
|----------|-----------------------------|--------------------------------------------------------------------------------------------------------------|------|-----|
| <b>B</b> | gi 88944468 ref XM_936761.1 | PREDICTED: Homo sapiens family with sequence similarity 41, member C (FAM41C), mRNA, 660 bp                  | 94   | 48  |
| <b>B</b> | gi 88942302 ref XM_496333.2 | PREDICTED: Homo sapiens family with sequence similarity 41, member C (FAM41C), mRNA, 660 bp                  | 94   | 48  |
| <b>B</b> | gi 89027706 ref XM_927336.1 | PREDICTED: Homo sapiens hypothetical protein LOC644113 (LOC644113), mRNA, 531 bp                             | 92.1 | 59  |
| <b>B</b> | gi 89026748 ref XM_935631.1 | PREDICTED: Homo sapiens similar to RPL23AP7 protein (MGC70863), mRNA, 913 bp                                 | 92.4 | 34  |
| <b>B</b> | gi 89040554 ref XM_926151.1 | PREDICTED: Homo sapiens similar to similar to RPL23AP7 protein (LOC653138), mRNA, 913 bp                     | 92.4 | 34  |
| <b>B</b> | gi 89030138 ref XM_927024.1 | PREDICTED: Homo sapiens similar to similar to RPL23AP7 protein (LOC653346), mRNA, 916 bp                     | 92.4 | 34  |
| <b>B</b> | gi 89024636 ref XM_928275.1 | PREDICTED: Homo sapiens similar to similar to RPL23AP7 protein (LOC645236), mRNA, 526 bp                     | 92.4 | 59  |
| <b>C</b> | gi 89029107 ref XM_931012.1 | PREDICTED: Homo sapiens CXYorf1-related protein, transcript variant 43 (FLJ00038), mRNA, 10198 bp            | 100  | 48  |
| <b>C</b> | gi 89029081 ref XM_930913.1 | PREDICTED: Homo sapiens CXYorf1-related protein, transcript variant 31 (FLJ00038), mRNA, 10957 bp            | 100  | 52  |
| <b>C</b> | gi 89029067 ref XM_930858.1 | PREDICTED: Homo sapiens CXYorf1-related protein, transcript variant 24 (FLJ00038), mRNA, 10467 bp            | 100  | 54  |
| <b>C</b> | gi 89029065 ref XM_930847.1 | PREDICTED: Homo sapiens CXYorf1-related protein, transcript variant 23 (FLJ00038), mRNA, 10553 bp            | 100  | 54  |
| <b>C</b> | gi 89029063 ref XM_930839.1 | PREDICTED: Homo sapiens CXYorf1-related protein, transcript variant 22 (FLJ00038), mRNA, 10338 bp            | 100  | 49  |
| <b>C</b> | gi 89029053 ref XM_930782.1 | PREDICTED: Homo sapiens CXYorf1-related protein, transcript variant 17 (FLJ00038), mRNA, 10147 bp            | 100  | 48  |
| <b>C</b> | gi 89029051 ref XM_930773.1 | PREDICTED: Homo sapiens CXYorf1-related protein, transcript variant 16 (FLJ00038), mRNA, 10238 bp            | 100  | 48  |
| <b>C</b> | gi 89029049 ref XM_930763.1 | PREDICTED: Homo sapiens CXYorf1-related protein, transcript variant 15 (FLJ00038), mRNA, 9383 bp             | 100  | 60  |
| <b>C</b> | gi 89029077 ref XM_930901.1 | PREDICTED: Homo sapiens CXYorf1-related protein, transcript variant 29 (FLJ00038), mRNA, 11093 bp            | 100  | 52  |
| <b>C</b> | gi 89029155 ref XM_376814.3 | PREDICTED: Homo sapiens hypothetical protein MGC13005 (MGC13005), mRNA, 3992 bp                              | 100  | 100 |
| <b>C</b> | gi 89060451 ref XM_933164.1 | PREDICTED: Homo sapiens similar to CXYorf1-related protein, transcript variant 27 (LOC653440), mRNA, 4919 bp | 98.3 | 100 |
| <b>C</b> | gi 89060449 ref XM_933161.1 | PREDICTED: Homo sapiens similar to CXYorf1-related protein, transcript variant 26 (LOC653440), mRNA, 4260 bp | 98.3 | 100 |

|          |                             |                                                                                                                         |      |     |
|----------|-----------------------------|-------------------------------------------------------------------------------------------------------------------------|------|-----|
| <b>C</b> | gi 89060437 ref XM_933136.1 | PREDICTED: Homo sapiens similar to CXYorf1-related protein, transcript variant 20 (LOC653440), mRNA, 5678 bp            | 98.4 | 100 |
| <b>C</b> | gi 89060419 ref XM_933090.1 | PREDICTED: Homo sapiens similar to CXYorf1-related protein, transcript variant 11 (LOC653440), mRNA, 5059 bp            | 98.3 | 100 |
| <b>C</b> | gi 89060415 ref XM_933073.1 | PREDICTED: Homo sapiens similar to CXYorf1-related protein, transcript variant 9 (LOC653440), mRNA, 5159 bp             | 98.3 | 100 |
| <b>C</b> | gi 89060413 ref XM_933069.1 | PREDICTED: Homo sapiens similar to CXYorf1-related protein, transcript variant 8 (LOC653440), mRNA, 4868 bp             | 98.3 | 100 |
| <b>C</b> | gi 89060409 ref XM_933062.1 | PREDICTED: Homo sapiens similar to CXYorf1-related protein, transcript variant 6 (LOC653440), mRNA, 4959 bp             | 98.3 | 100 |
| <b>C</b> | gi 89060401 ref XM_933053.1 | PREDICTED: Homo sapiens similar to CXYorf1-related protein, transcript variant 2 (LOC653440), mRNA, 3435 bp             | 98.6 | 100 |
| <b>C</b> | gi 88942112 ref XM_926939.1 | PREDICTED: Homo sapiens similar to DEAD/H (Asp-Glu-Ala-Asp/His) box polypeptide 11 isoform 1 (LOC643635), mRNA, 4032 bp | 98.5 | 100 |
| <b>C</b> | gi 89038711 ref XM_928159.1 | PREDICTED: Homo sapiens similar to DEAD/H (Asp-Glu-Ala-Asp/His) box polypeptide 11 isoform 1 (LOC645128), mRNA, 4001 bp | 98.4 | 100 |
| <b>C</b> | gi 89029109 ref XM_931018.1 | PREDICTED: Homo sapiens CXYorf1-related protein, transcript variant 44 (FLJ00038), mRNA, 9365 bp                        | 100  | 44  |
| <b>C</b> | gi 89029087 ref XM_930941.1 | PREDICTED: Homo sapiens CXYorf1-related protein, transcript variant 34 (FLJ00038), mRNA, 10776 bp                       | 100  | 51  |
| <b>C</b> | gi 89060453 ref XM_933171.1 | PREDICTED: Homo sapiens similar to CXYorf1-related protein, transcript variant 28 (LOC653440), mRNA, 4083 bp            | 98.2 | 100 |
| <b>C</b> | gi 89060439 ref XM_933140.1 | PREDICTED: Homo sapiens similar to CXYorf1-related protein, transcript variant 21 (LOC653440), mRNA, 5501 bp            | 98.3 | 100 |
| <b>C</b> | gi 89029099 ref XM_930979.1 | PREDICTED: Homo sapiens CXYorf1-related protein, transcript variant 39 (FLJ00038), mRNA, 10159 bp                       | 100  | 48  |
| <b>C</b> | gi 89029097 ref XM_930971.1 | PREDICTED: Homo sapiens CXYorf1-related protein, transcript variant 38 (FLJ00038), mRNA, 10299 bp                       | 100  | 49  |
| <b>C</b> | gi 89029093 ref XM_930957.1 | PREDICTED: Homo sapiens CXYorf1-related protein, transcript variant 36 (FLJ00038), mRNA, 10398 bp                       | 100  | 49  |
| <b>C</b> | gi 89029079 ref XM_930907.1 | PREDICTED: Homo sapiens CXYorf1-related protein, transcript variant 30 (FLJ00038), mRNA, 10023 bp                       | 100  | 47  |
| <b>C</b> | gi 89029075 ref XM_930896.1 | PREDICTED: Homo sapiens CXYorf1-related protein, transcript variant 28 (FLJ00038), mRNA, 10405 bp                       | 100  | 49  |

|          |                             |                                                                                                              |      |     |
|----------|-----------------------------|--------------------------------------------------------------------------------------------------------------|------|-----|
| <b>C</b> | gi 89029071 ref XM_930877.1 | PREDICTED: Homo sapiens CXYorf1-related protein, transcript variant 26 (FLJ00038), mRNA, 10036 bp            | 100  | 47  |
| <b>C</b> | gi 89029039 ref XM_930711.1 | PREDICTED: Homo sapiens CXYorf1-related protein, transcript variant 10 (FLJ00038), mRNA, 4038 bp             | 100  | 96  |
| <b>C</b> | gi 89029037 ref XM_930700.1 | PREDICTED: Homo sapiens CXYorf1-related protein, transcript variant 9 (FLJ00038), mRNA, 3533 bp              | 100  | 95  |
| <b>C</b> | gi 89029031 ref XM_930659.1 | PREDICTED: Homo sapiens CXYorf1-related protein, transcript variant 6 (FLJ00038), mRNA, 3360 bp              | 100  | 95  |
| <b>C</b> | gi 89029157 ref XM_928555.1 | PREDICTED: Homo sapiens similar to hypothetical protein MGC13005 (LOC645536), mRNA, 2888 bp                  | 100  | 100 |
| <b>C</b> | gi 89029085 ref XM_930933.1 | PREDICTED: Homo sapiens CXYorf1-related protein, transcript variant 33 (FLJ00038), mRNA, 9643 bp             | 100  | 45  |
| <b>C</b> | gi 89029111 ref XM_931024.1 | PREDICTED: Homo sapiens CXYorf1-related protein, transcript variant 45 (FLJ00038), mRNA, 9126 bp             | 100  | 42  |
| <b>C</b> | gi 89029101 ref XM_930989.1 | PREDICTED: Homo sapiens CXYorf1-related protein, transcript variant 40 (FLJ00038), mRNA, 9646 bp             | 100  | 45  |
| <b>C</b> | gi 89060445 ref XM_933153.1 | PREDICTED: Homo sapiens similar to CXYorf1-related protein, transcript variant 24 (LOC653440), mRNA, 4347 bp | 98.5 | 100 |
| <b>C</b> | gi 89060435 ref XM_933132.1 | PREDICTED: Homo sapiens similar to CXYorf1-related protein, transcript variant 19 (LOC653440), mRNA, 4487 bp | 98.4 | 100 |
| <b>C</b> | gi 89060433 ref XM_933128.1 | PREDICTED: Homo sapiens similar to CXYorf1-related protein, transcript variant 18 (LOC653440), mRNA, 4743 bp | 98.4 | 100 |
| <b>C</b> | gi 89060431 ref XM_933121.1 | PREDICTED: Homo sapiens similar to CXYorf1-related protein, transcript variant 17 (LOC653440), mRNA, 5126 bp | 98.2 | 100 |
| <b>C</b> | gi 89060429 ref XM_933115.1 | PREDICTED: Homo sapiens similar to CXYorf1-related protein, transcript variant 16 (LOC653440), mRNA, 4753 bp | 98.5 | 100 |
| <b>C</b> | gi 89060421 ref XM_933094.1 | PREDICTED: Homo sapiens similar to CXYorf1-related protein, transcript variant 12 (LOC653440), mRNA, 3102 bp | 98.2 | 99  |
| <b>C</b> | gi 88942114 ref XM_926948.1 | PREDICTED: Homo sapiens similar to hypothetical protein MGC13005 (LOC643643), mRNA, 2928 bp                  | 98.5 | 100 |
| <b>C</b> | gi 89038709 ref XM_928155.1 | PREDICTED: Homo sapiens similar to hypothetical protein MGC13005 (LOC645124), mRNA, 2897 bp                  | 98.2 | 100 |
| <b>C</b> | gi 89060459 ref XM_933185.1 | PREDICTED: Homo sapiens similar to CXYorf1-related protein, transcript variant 31 (LOC653440), mRNA, 3844 bp | 98.2 | 100 |

|          |                             |                                                                                                              |      |     |
|----------|-----------------------------|--------------------------------------------------------------------------------------------------------------|------|-----|
| <b>C</b> | gi 89060455 ref XM_933177.1 | PREDICTED: Homo sapiens similar to CXYorf1-related protein, transcript variant 29 (LOC653440), mRNA, 3708 bp | 98.1 | 100 |
| <b>C</b> | gi 89029069 ref XM_930868.1 | PREDICTED: Homo sapiens CXYorf1-related protein, transcript variant 25 (FLJ00038), mRNA, 8888 bp             | 100  | 41  |
| <b>C</b> | gi 89029057 ref XM_930803.1 | PREDICTED: Homo sapiens CXYorf1-related protein, transcript variant 19 (FLJ00038), mRNA, 9123 bp             | 100  | 42  |
| <b>C</b> | gi 89029095 ref XM_930965.1 | PREDICTED: Homo sapiens CXYorf1-related protein, transcript variant 37 (FLJ00038), mRNA, 9863 bp             | 100  | 46  |
| <b>C</b> | gi 89029027 ref XM_930631.1 | PREDICTED: Homo sapiens CXYorf1-related protein, transcript variant 4 (FLJ00038), mRNA, 2289 bp              | 100  | 99  |
| <b>C</b> | gi 89029105 ref XM_931007.1 | PREDICTED: Homo sapiens CXYorf1-related protein, transcript variant 42 (FLJ00038), mRNA, 9264 bp             | 100  | 43  |
| <b>C</b> | gi 89029073 ref XM_930885.1 | PREDICTED: Homo sapiens CXYorf1-related protein, transcript variant 27 (FLJ00038), mRNA, 9440 bp             | 100  | 44  |
| <b>C</b> | gi 89029033 ref XM_930674.1 | PREDICTED: Homo sapiens CXYorf1-related protein, transcript variant 7 (FLJ00038), mRNA, 2049 bp              | 100  | 92  |
| <b>C</b> | gi 89029113 ref XM_931031.1 | PREDICTED: Homo sapiens CXYorf1-related protein, transcript variant 46 (FLJ00038), mRNA, 8215 bp             | 100  | 36  |
| <b>C</b> | gi 89029103 ref XM_930998.1 | PREDICTED: Homo sapiens CXYorf1-related protein, transcript variant 41 (FLJ00038), mRNA, 8608 bp             | 100  | 39  |
| <b>C</b> | gi 89029091 ref XM_926088.1 | PREDICTED: Homo sapiens CXYorf1-related protein, transcript variant 1 (FLJ00038), mRNA, 2473 bp              | 100  | 83  |
| <b>C</b> | gi 89029089 ref XM_930947.1 | PREDICTED: Homo sapiens CXYorf1-related protein, transcript variant 35 (FLJ00038), mRNA, 9507 bp             | 100  | 44  |
| <b>C</b> | gi 89029083 ref XM_930924.1 | PREDICTED: Homo sapiens CXYorf1-related protein, transcript variant 32 (FLJ00038), mRNA, 8595 bp             | 100  | 39  |
| <b>C</b> | gi 89029061 ref XM_930826.1 | PREDICTED: Homo sapiens CXYorf1-related protein, transcript variant 21 (FLJ00038), mRNA, 8983 bp             | 100  | 41  |
| <b>C</b> | gi 89029059 ref XM_930816.1 | PREDICTED: Homo sapiens CXYorf1-related protein, transcript variant 20 (FLJ00038), mRNA, 2411 bp             | 100  | 94  |
| <b>C</b> | gi 89029055 ref XM_930792.1 | PREDICTED: Homo sapiens CXYorf1-related protein, transcript variant 18 (FLJ00038), mRNA, 7388 bp             | 100  | 29  |
| <b>C</b> | gi 89029047 ref XM_930756.1 | PREDICTED: Homo sapiens CXYorf1-related protein, transcript variant 14 (FLJ00038), mRNA, 8494 bp             | 100  | 38  |
| <b>C</b> | gi 89029045 ref XM_930746.1 | PREDICTED: Homo sapiens CXYorf1-related protein, transcript variant 13 (FLJ00038), mRNA, 8437 bp             | 100  | 37  |
| <b>C</b> | gi 89029043 ref XM_930734.1 | PREDICTED: Homo sapiens CXYorf1-related protein, transcript variant 12 (FLJ00038), mRNA, 2442 bp             | 100  | 93  |

|          |                             |                                                                                                              |      |     |
|----------|-----------------------------|--------------------------------------------------------------------------------------------------------------|------|-----|
| <b>C</b> | gi 89029041 ref XM_930724.1 | PREDICTED: Homo sapiens CXYorf1-related protein, transcript variant 11 (FLJ00038), mRNA, 1931 bp             | 100  | 92  |
| <b>C</b> | gi 89029035 ref XM_930687.1 | PREDICTED: Homo sapiens CXYorf1-related protein, transcript variant 8 (FLJ00038), mRNA, 2442 bp              | 100  | 93  |
| <b>C</b> | gi 89029025 ref XM_930619.1 | PREDICTED: Homo sapiens CXYorf1-related protein, transcript variant 3 (FLJ00038), mRNA, 8259 bp              | 100  | 36  |
| <b>C</b> | gi 89060411 ref XM_933065.1 | PREDICTED: Homo sapiens similar to CXYorf1-related protein, transcript variant 7 (LOC653440), mRNA, 2282 bp  | 97.9 | 99  |
| <b>C</b> | gi 89060425 ref XM_933104.1 | PREDICTED: Homo sapiens similar to CXYorf1-related protein, transcript variant 14 (LOC653440), mRNA, 3828 bp | 98.4 | 100 |
| <b>C</b> | gi 89060417 ref XM_933080.1 | PREDICTED: Homo sapiens similar to CXYorf1-related protein, transcript variant 10 (LOC653440), mRNA, 3628 bp | 98.4 | 100 |
| <b>C</b> | gi 89029029 ref XM_930643.1 | PREDICTED: Homo sapiens CXYorf1-related protein, transcript variant 5 (FLJ00038), mRNA, 7909 bp              | 100  | 33  |
| <b>C</b> | gi 89060461 ref XM_377073.2 | PREDICTED: Homo sapiens similar to CXYorf1-related protein, transcript variant 1 (LOC653440), mRNA, 2929 bp  | 98.4 | 100 |
| <b>C</b> | gi 89060457 ref XM_933181.1 | PREDICTED: Homo sapiens similar to CXYorf1-related protein, transcript variant 30 (LOC653440), mRNA, 3325 bp | 98.3 | 100 |
| <b>C</b> | gi 89060447 ref XM_933157.1 | PREDICTED: Homo sapiens similar to CXYorf1-related protein, transcript variant 25 (LOC653440), mRNA, 3696 bp | 98.4 | 100 |
| <b>C</b> | gi 89060441 ref XM_933144.1 | PREDICTED: Homo sapiens similar to CXYorf1-related protein, transcript variant 22 (LOC653440), mRNA, 3208 bp | 98.5 | 100 |
| <b>C</b> | gi 89060427 ref XM_933107.1 | PREDICTED: Homo sapiens similar to CXYorf1-related protein, transcript variant 15 (LOC653440), mRNA, 3688 bp | 98.5 | 100 |
| <b>C</b> | gi 89060423 ref XM_933099.1 | PREDICTED: Homo sapiens similar to CXYorf1-related protein, transcript variant 13 (LOC653440), mRNA, 2776 bp | 98.4 | 100 |
| <b>C</b> | gi 89060407 ref XM_933060.1 | PREDICTED: Homo sapiens similar to CXYorf1-related protein, transcript variant 5 (LOC653440), mRNA, 3836 bp  | 98.3 | 100 |
| <b>C</b> | gi 89060405 ref XM_933059.1 | PREDICTED: Homo sapiens similar to CXYorf1-related protein, transcript variant 4 (LOC653440), mRNA, 3151 bp  | 98.4 | 100 |
| <b>C</b> | gi 89060403 ref XM_933055.1 | PREDICTED: Homo sapiens similar to CXYorf1-related protein, transcript variant 3 (LOC653440), mRNA, 2104 bp  | 99   | 100 |
| <b>C</b> | gi 89060443 ref XM_933149.1 | PREDICTED: Homo sapiens similar to CXYorf1-related protein, transcript variant 23 (LOC653440), mRNA, 1523 bp | 97.5 | 99  |

|          |                             |                                                                                                 |      |     |
|----------|-----------------------------|-------------------------------------------------------------------------------------------------|------|-----|
| <b>C</b> | gi 40353752 ref NM_199163.2 | Homo sapiens CXYorf1-related protein (FLJ25222), mRNA, 2579 bp                                  | 98.3 | 61  |
| <b>C</b> | gi 39573729 ref NM_198943.1 | Homo sapiens CXYorf1-related protein (MGC52000), mRNA, 1748 bp                                  | 97.1 | 90  |
| <b>C</b> | gi 89029023 ref XM_930604.1 | PREDICTED: Homo sapiens CXYorf1-related protein, transcript variant 2 (FLJ00038), mRNA, 1585 bp | 100  | 73  |
| <b>C</b> | gi 39573706 ref NM_182905.1 | Homo sapiens CXYorf1-related protein (LOC349338), mRNA, 795 bp                                  | 98.7 | 100 |
| <b>D</b> | gi 89056981 ref XM_929847.1 | PREDICTED: Homo sapiens similar to 60S ribosomal protein L23a (LOC653789), mRNA, 885 bp         | 99   | 100 |
| <b>D</b> | gi 45238850 ref NM_203477.1 | Homo sapiens similar to RPL23AP7 protein (MGC70863), transcript variant 1, mRNA, 1389 bp        | 96.6 | 70  |
| <b>D</b> | gi 45238852 ref NM_203302.2 | Homo sapiens similar to RPL23AP7 protein (MGC70863), transcript variant 2, mRNA, 1249 bp        | 98.7 | 68  |
| <b>D</b> | gi 89042049 ref XM_371204.4 | PREDICTED: Homo sapiens similar to 60S ribosomal protein L23a (LOC388574), mRNA, 4062 bp        | 95.9 | 73  |
| <b>D</b> | gi 25141250 ref NR_000029.1 | Homo sapiens ribosomal protein L23a pseudogene 7 (RPL23AP7) on chromosome 2, 969 bp             | 98.3 | 80  |
| <b>D</b> | gi 88942148 ref XM_926984.1 | PREDICTED: Homo sapiens similar to 60S ribosomal protein L23a (LOC653341), mRNA, 823 bp         | 98.5 | 100 |
| <b>D</b> | gi 89027708 ref XM_927344.1 | PREDICTED: Homo sapiens hypothetical protein LOC644128 (LOC644128), mRNA, 4440 bp               | 94.1 | 65  |
| <b>D</b> | gi 89037197 ref XM_939563.1 | PREDICTED: Homo sapiens similar to 60S ribosomal protein L23a (LOC650472), mRNA, 805 bp         | 95.4 | 100 |
| <b>D</b> | gi 88969474 ref XM_936392.1 | PREDICTED: Homo sapiens similar to RPL23AP7 protein (MGC70863), mRNA, 704 bp                    | 95.3 | 100 |
| <b>D</b> | gi 78190460 ref NM_000984.5 | Homo sapiens ribosomal protein L23a (RPL23A), mRNA, 979 bp                                      | 91   | 52  |
| <b>D</b> | gi 88971265 ref XM_941396.1 | PREDICTED: Homo sapiens similar to 60S ribosomal protein L23a (LOC652071), mRNA, 582 bp         | 90.8 | 88  |
| <b>D</b> | gi 88965928 ref XM_930113.1 | PREDICTED: Homo sapiens similar to 60S ribosomal protein L23a (LOC647099), mRNA, 582 bp         | 90.8 | 88  |
| <b>D</b> | gi 89057256 ref XM_937620.1 | PREDICTED: Homo sapiens similar to 60S ribosomal protein L23a (LOC401904), mRNA, 960 bp         | 90.9 | 50  |
| <b>D</b> | gi 89052442 ref XM_377521.3 | PREDICTED: Homo sapiens similar to 60S ribosomal protein L23a (LOC401904), mRNA, 960 bp         | 90.9 | 50  |
| <b>D</b> | gi 89033725 ref XM_925804.1 | PREDICTED: Homo sapiens similar to similar to RPL23AP7 protein (LOC642257), mRNA, 529 bp        | 95.1 | 100 |
| <b>D</b> | gi 89050223 ref XM_928041.1 | PREDICTED: Homo sapiens hypothetical protein LOC644964 (LOC644964), mRNA, 531 bp                | 94.9 | 100 |
| <b>D</b> | gi 88944468 ref XM_936761.1 | PREDICTED: Homo sapiens family with sequence similarity 41, member C (FAM41C), mRNA, 660 bp     | 95.2 | 76  |

|          |                             |                                                                                             |      |     |
|----------|-----------------------------|---------------------------------------------------------------------------------------------|------|-----|
| <b>D</b> | gi 88942302 ref XM_496333.2 | PREDICTED: Homo sapiens family with sequence similarity 41, member C (FAM41C), mRNA, 660 bp | 95.2 | 76  |
| <b>D</b> | gi 89030138 ref XM_927024.1 | PREDICTED: Homo sapiens similar to similar to RPL23AP7 protein (LOC653346), mRNA, 916 bp    | 95.2 | 55  |
| <b>D</b> | gi 89027706 ref XM_927336.1 | PREDICTED: Homo sapiens hypothetical protein LOC644113 (LOC644113), mRNA, 531 bp            | 94.4 | 100 |
| <b>D</b> | gi 89027700 ref XM_927280.1 | PREDICTED: Homo sapiens similar to similar to RPL23AP7 protein (LOC644033), mRNA, 531 bp    | 94.4 | 100 |
| <b>D</b> | gi 89026748 ref XM_935631.1 | PREDICTED: Homo sapiens similar to RPL23AP7 protein (MGC70863), mRNA, 913 bp                | 95.2 | 54  |
| <b>D</b> | gi 89040554 ref XM_926151.1 | PREDICTED: Homo sapiens similar to similar to RPL23AP7 protein (LOC653138), mRNA, 913 bp    | 95.2 | 54  |
| <b>D</b> | gi 89024636 ref XM_928275.1 | PREDICTED: Homo sapiens similar to similar to RPL23AP7 protein (LOC645236), mRNA, 526 bp    | 95.1 | 100 |
| <b>D</b> | gi 89066164 ref XM_939197.1 | PREDICTED: Homo sapiens similar to similar to RPL23AP7 protein (LOC650103), mRNA, 531 bp    | 94.2 | 100 |
| <b>D</b> | gi 89040556 ref XM_926164.1 | PREDICTED: Homo sapiens hypothetical protein LOC642720 (LOC642720), mRNA, 531 bp            | 94   | 100 |
| <b>F</b> | gi 88957849 ref XM_943168.1 | PREDICTED: Homo sapiens hypothetical protein LOC647989 (LOC647989), mRNA, 726 bp            | 93.2 | 96  |
| <b>F</b> | gi 47551355 ref NM_214461.1 | Homo sapiens MGC50273 protein (MGC50273), mRNA, 1429 bp                                     | 93.3 | 40  |
